# Supplementary material for: Diversity-oriented routes to thiopeptide antibiotics: total synthesis and biological evaluation of micrococcin P2
Source: Royal Society of Chemistry journal article supplement (doi:10.1039/d1ob02145a), 2021-12-02
Supplement: d1ob02145a2.pdf [file d1ob02145a2.pdf]

**Diversity-Oriented Routes to Thiopeptide Antibiotics: Total Synthesis and Biological Evaluation of Micrococcin P2.**

Hee-Jong Hwang,<sup>\*†a,b</sup> Young-Jin Son,<sup>†a,c</sup> Dahyun Kim,<sup>a</sup> Jusuk Lee,<sup>a</sup> Yun-Jeong Shin,<sup>c</sup> Yonghoon Kwon,<sup>\*c</sup> Marco A. Ciufolini<sup>\*b</sup>

<sup>a</sup>A&J Science Co., Ltd., 80 Chumbok Ro, Dong Gu, Daegu, 41061, Republic of Korea.

<sup>b</sup>Department of Chemistry, University of British Columbia, 2036 Main Mall, Vancouver, BC V6K 1Z1, Canada.

<sup>c</sup>Department of Agricultural Biotechnology, Seoul National University, 1 Gwanak-ro, Gwanak-gu, Seoul, 08826, Republic of Korea

# Supporting Information

## *<sup>1</sup>H and <sup>13</sup>C NMR Spectra*

**Table of Contents**

|                                                    |       |
|----------------------------------------------------|-------|
| <sup>1</sup> H NMR Spectrum of compound <b>8</b>   | p. 5  |
| <sup>13</sup> C NMR Spectrum of compound <b>8</b>  | p. 6  |
| <sup>1</sup> H NMR Spectrum of compound <b>9</b>   | p. 7  |
| <sup>13</sup> C NMR Spectrum of compound <b>9</b>  | p. 8  |
| <sup>1</sup> H NMR Spectrum of compound <b>10</b>  | p. 9  |
| <sup>13</sup> C NMR Spectrum of compound <b>10</b> | p. 10 |
| <sup>1</sup> H NMR Spectrum of compound <b>12</b>  | p. 11 |
| <sup>13</sup> C NMR Spectrum of compound <b>12</b> | p. 12 |
| <sup>1</sup> H NMR Spectrum of compound <b>15</b>  | p. 13 |
| <sup>13</sup> C NMR Spectrum of compound <b>15</b> | p. 14 |
| <sup>1</sup> H NMR Spectrum of compound <b>16</b>  | p. 15 |
| <sup>13</sup> C NMR Spectrum of compound <b>16</b> | p. 16 |
| HSQC Spectrum of compound <b>16</b>                | p. 17 |
| HMBC Spectrum of compound <b>16</b>                | p. 18 |
| <sup>1</sup> H NMR Spectrum of compound <b>17</b>  | p. 19 |
| <sup>13</sup> C NMR Spectrum of compound <b>17</b> | p. 20 |
| <sup>1</sup> H NMR Spectrum of compound <b>18</b>  | p. 21 |
| <sup>13</sup> C NMR Spectrum of compound <b>18</b> | p. 22 |
| <sup>1</sup> H NMR Spectrum of compound <b>6</b>   | p. 23 |
| <sup>13</sup> C NMR Spectrum of compound <b>6</b>  | p. 24 |
| <sup>1</sup> H NMR Spectrum of compound <b>20</b>  | p. 25 |
| <sup>13</sup> C NMR Spectrum of compound <b>20</b> | p. 26 |
| <sup>1</sup> H NMR Spectrum of compound <b>3</b>   | p. 27 |
| <sup>13</sup> C NMR Spectrum of compound <b>3</b>  | p. 28 |
| <sup>1</sup> H NMR Spectrum of compound <b>22a</b> | p. 29 |

|                                                     |       |
|-----------------------------------------------------|-------|
| <sup>13</sup> C NMR Spectrum of compound <b>22a</b> | p. 30 |
| <sup>1</sup> H NMR Spectrum of compound <b>22b</b>  | p. 31 |
| <sup>13</sup> C NMR Spectrum of compound <b>22b</b> | p. 32 |
| <sup>1</sup> H NMR Spectrum of compound <b>22c</b>  | p. 33 |
| <sup>13</sup> C NMR Spectrum of compound <b>22c</b> | p. 34 |
| <sup>1</sup> H NMR Spectrum of compound <b>22d</b>  | p. 35 |
| <sup>13</sup> C NMR Spectrum of compound <b>22d</b> | p. 36 |
| <sup>1</sup> H NMR Spectrum of compound <b>22e</b>  | p. 37 |
| <sup>13</sup> C NMR Spectrum of compound <b>22e</b> | p. 38 |
| HSQC Spectrum of compound <b>22e</b>                | p. 39 |
| HMBC Spectrum of compound <b>22e</b>                | p. 40 |
| <sup>1</sup> H NMR Spectrum of compound <b>22f</b>  | p. 41 |
| <sup>13</sup> C NMR Spectrum of compound <b>22f</b> | p. 42 |
| HSQC Spectrum of compound <b>22f</b>                | p. 43 |
| HMBC Spectrum of compound <b>22f</b>                | p. 44 |
| <sup>1</sup> H NMR Spectrum of compound <b>22g</b>  | p. 45 |
| <sup>13</sup> C NMR Spectrum of compound <b>22g</b> | p. 46 |
| <sup>1</sup> H NMR Spectrum of compound <b>22h</b>  | p. 47 |
| <sup>13</sup> C NMR Spectrum of compound <b>22h</b> | p. 48 |
| <sup>1</sup> H NMR Spectrum of compound <b>27</b>   | p. 49 |
| <sup>13</sup> C NMR Spectrum of compound <b>27</b>  | p. 50 |
| <sup>1</sup> H NMR Spectrum of compound <b>28</b>   | p. 51 |
| <sup>13</sup> C NMR Spectrum of compound <b>28</b>  | p. 52 |
| HSQC Spectrum of compound <b>28</b>                 | p. 53 |
| <sup>1</sup> H NMR Spectrum of compound <b>29</b>   | p. 54 |
| <sup>13</sup> C NMR Spectrum of compound <b>29</b>  | p. 55 |
| HSQC Spectrum of compound <b>29</b>                 | p. 56 |

|                                                                                                  |       |
|--------------------------------------------------------------------------------------------------|-------|
| <sup>1</sup> H NMR Spectrum of compound <b>24</b>                                                | p. 57 |
| <sup>13</sup> C NMR Spectrum of compound <b>24</b>                                               | p. 58 |
| HSQC Spectrum of compound <b>24</b>                                                              | p. 59 |
| <sup>1</sup> H NMR Spectrum of compound <b>25</b>                                                | p. 60 |
| <sup>13</sup> C NMR Spectrum of compound <b>25</b>                                               | p. 61 |
| <sup>1</sup> H NMR Spectrum of synthetic micrococcin P2                                          | p. 62 |
| <sup>13</sup> C NMR Spectrum of synthetic micrococcin P2                                         | p. 63 |
| <sup>1</sup> H NMR Spectrum of synthetic micrococcin P1                                          | p. 64 |
| <sup>1</sup> H NMR Spectrum of authentic micrococcin P1                                          | p. 65 |
| <sup>1</sup> H NMR Spectral comparison of reduced MP2 vs. MP1                                    | p. 66 |
| <sup>1</sup> H NMR Spectrum of reduced MP2 in DMSO- <i>d</i> <sub>6</sub> : epimers not resolved | p. 67 |
| <sup>1</sup> H NMR Spectrum of reduced MP2 in CDCl <sub>3</sub> : epimers resolved               | p. 68 |
| <sup>1</sup> H NMR Spectrum of compound <b>30</b>                                                | p. 69 |
| <sup>13</sup> C NMR Spectrum of compound <b>30</b>                                               | p. 70 |
| <sup>1</sup> H NMR Spectra of synthetic vs. fermented MP2                                        | p. 71 |
| <sup>13</sup> C NMR Spectra of synthetic vs. fermented MP2                                       | p. 72 |

SYJ070220.1.fid  
SYJ-02-029-001  
1H NMR  
CDCl3

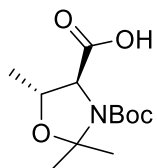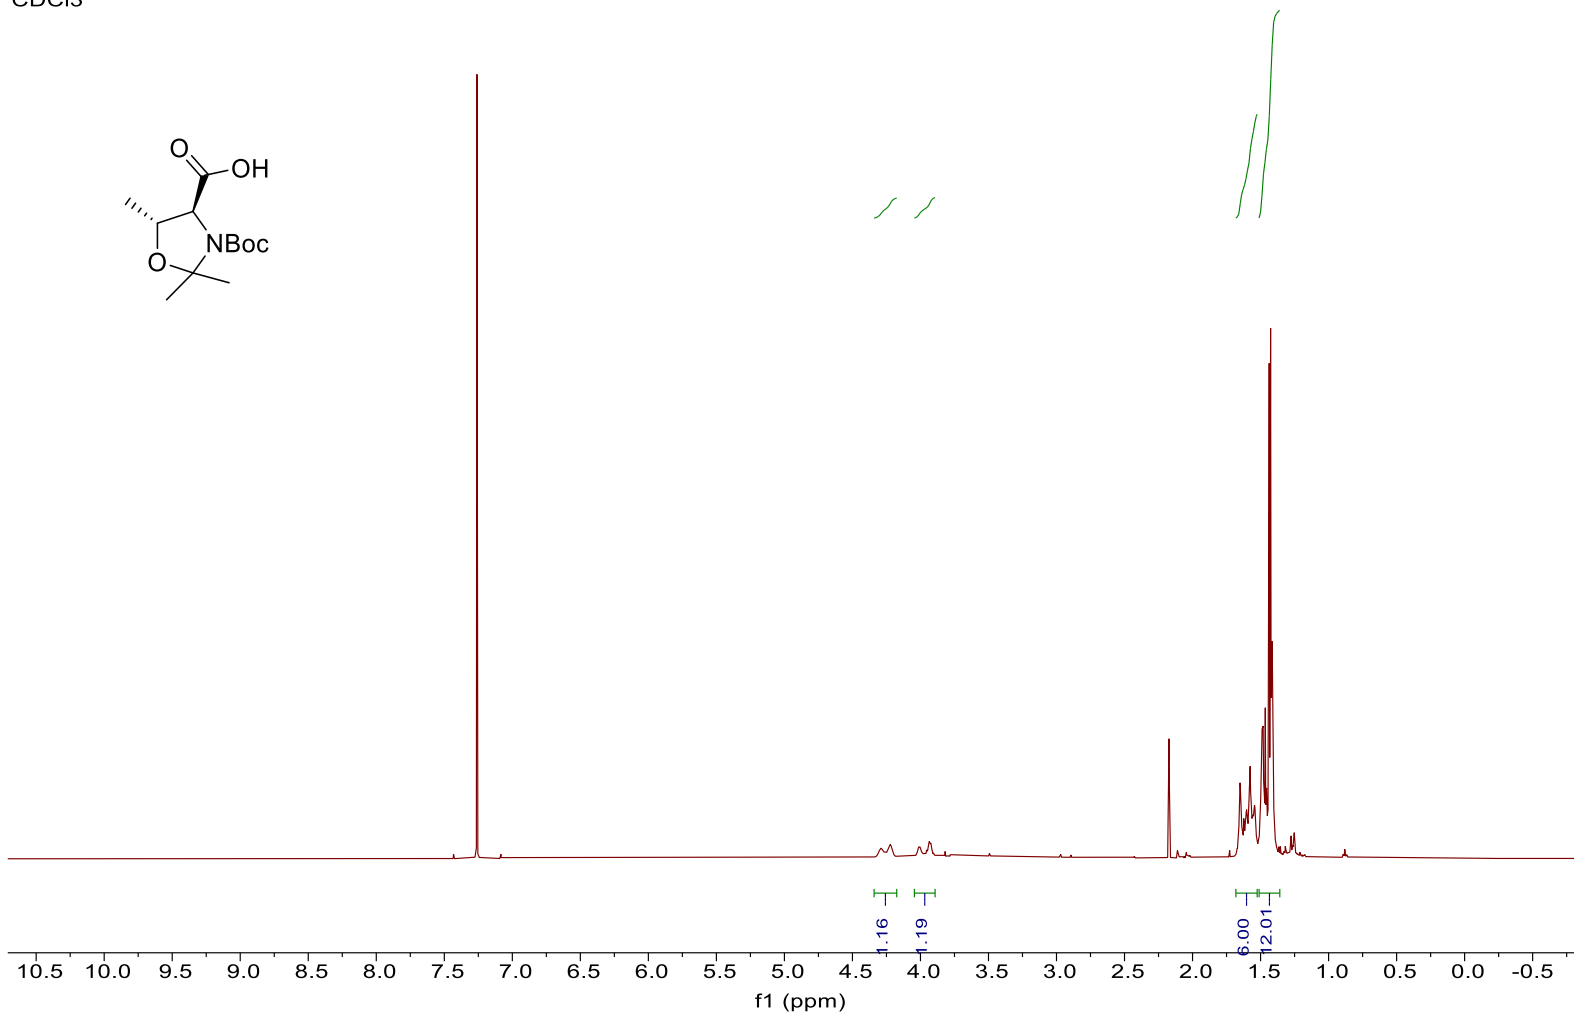

**<sup>1</sup>H-NMR Spectrum of Compound 8 (600 MHz, CDCl<sub>3</sub>)**

SYJ070220.50.fid  
SYJ-02-029-001  
13C NMR  
CDCl3

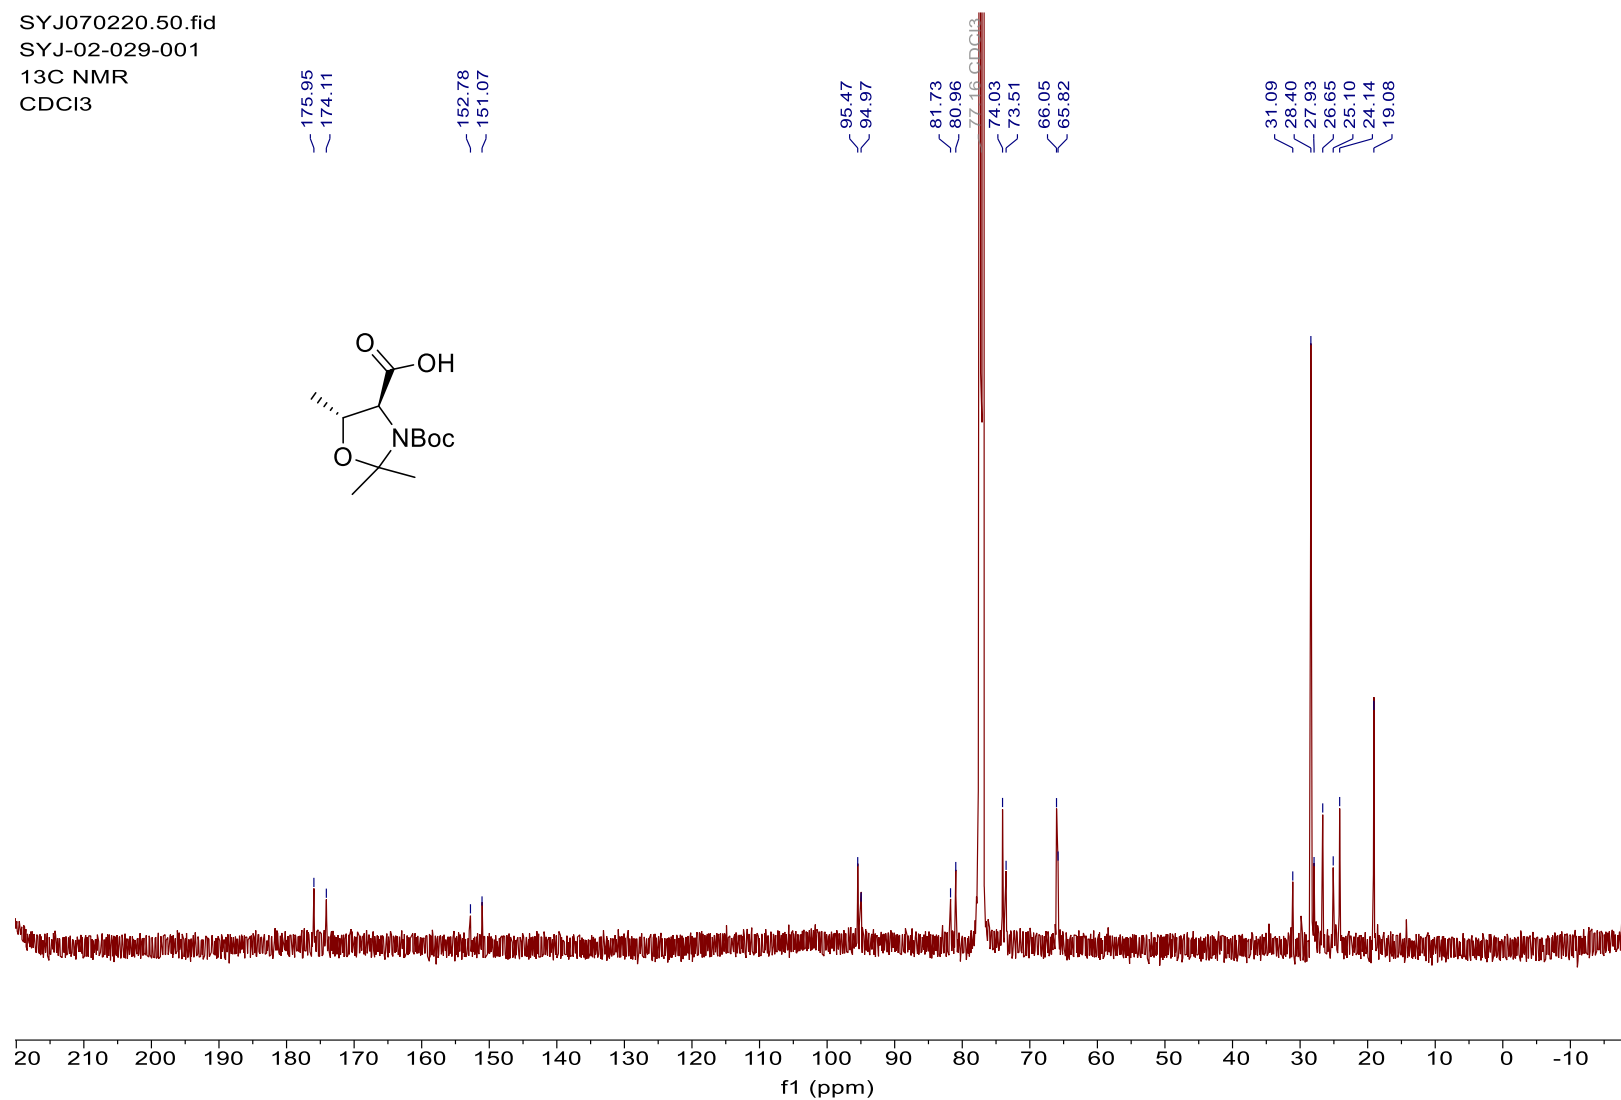

**<sup>13</sup>C NMR Spectrum of Compound 8 (151 MHz, CDCl<sub>3</sub>)**

SYJ070220.10.fid  
SYJ-02-029-002  
1H NMR  
CDCl<sub>3</sub>

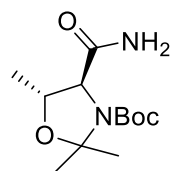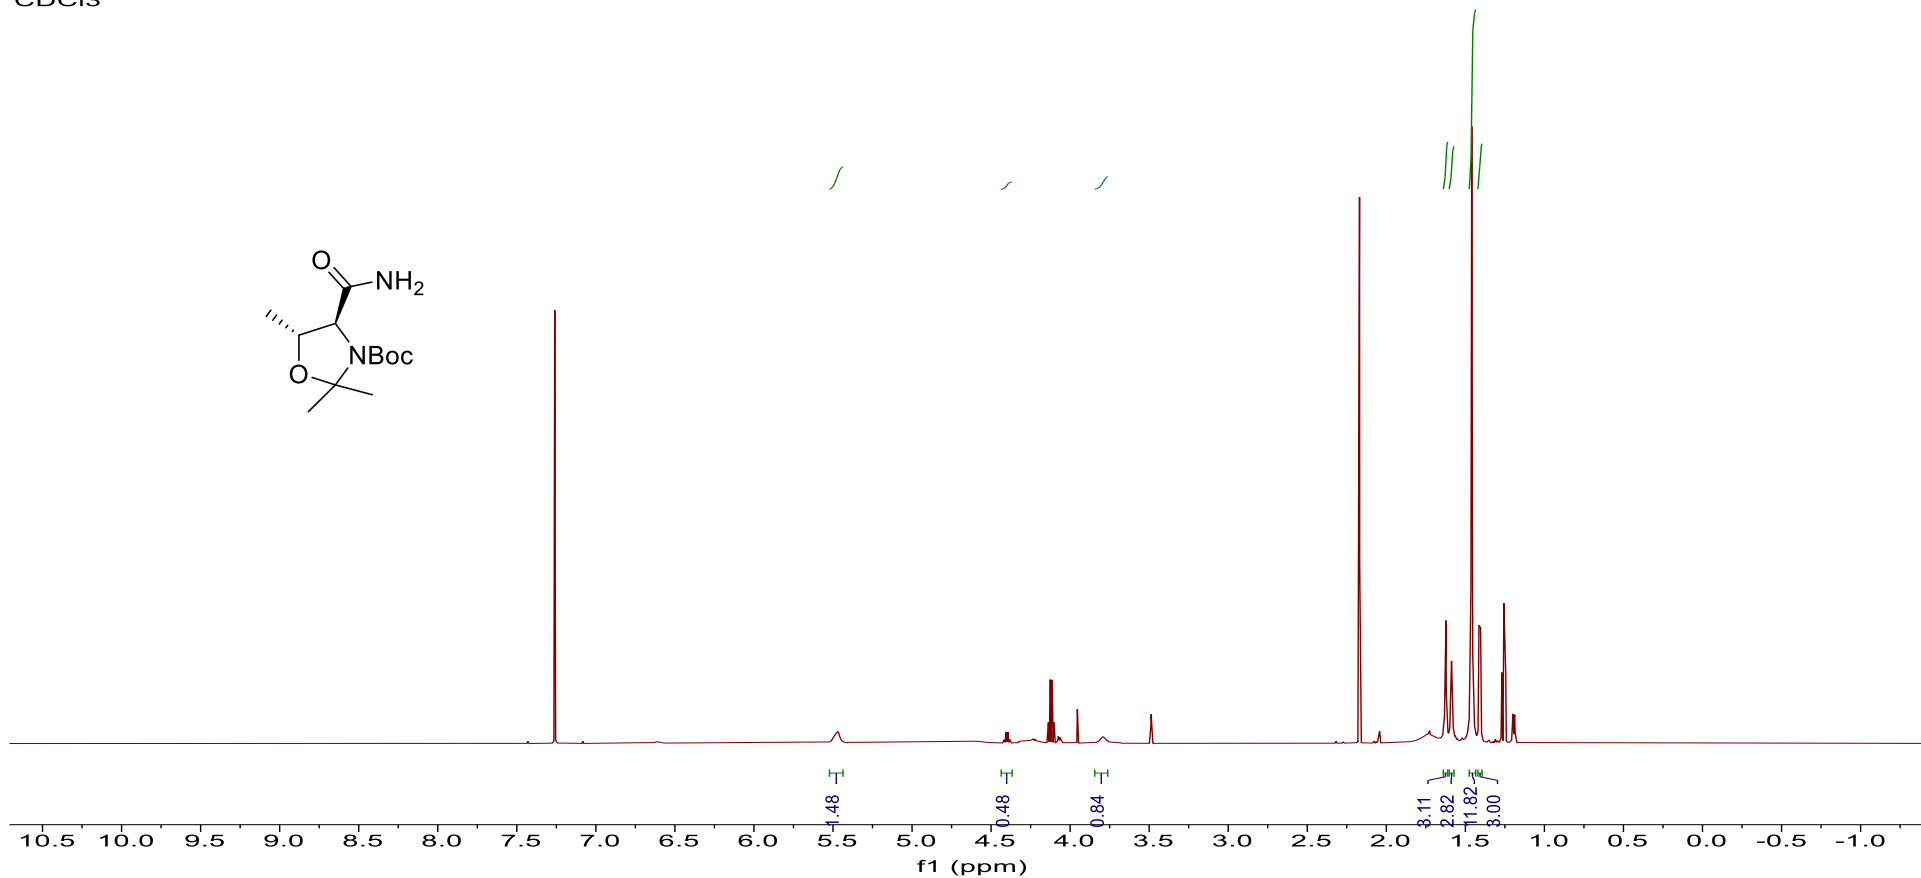

**<sup>1</sup>H-NMR Spectrum of Compound 9 (600 MHz, CDCl<sub>3</sub>)**

SYJ070220.51.fid  
SYJ-02-029-002  
13C NMR  
CDCl<sub>3</sub>

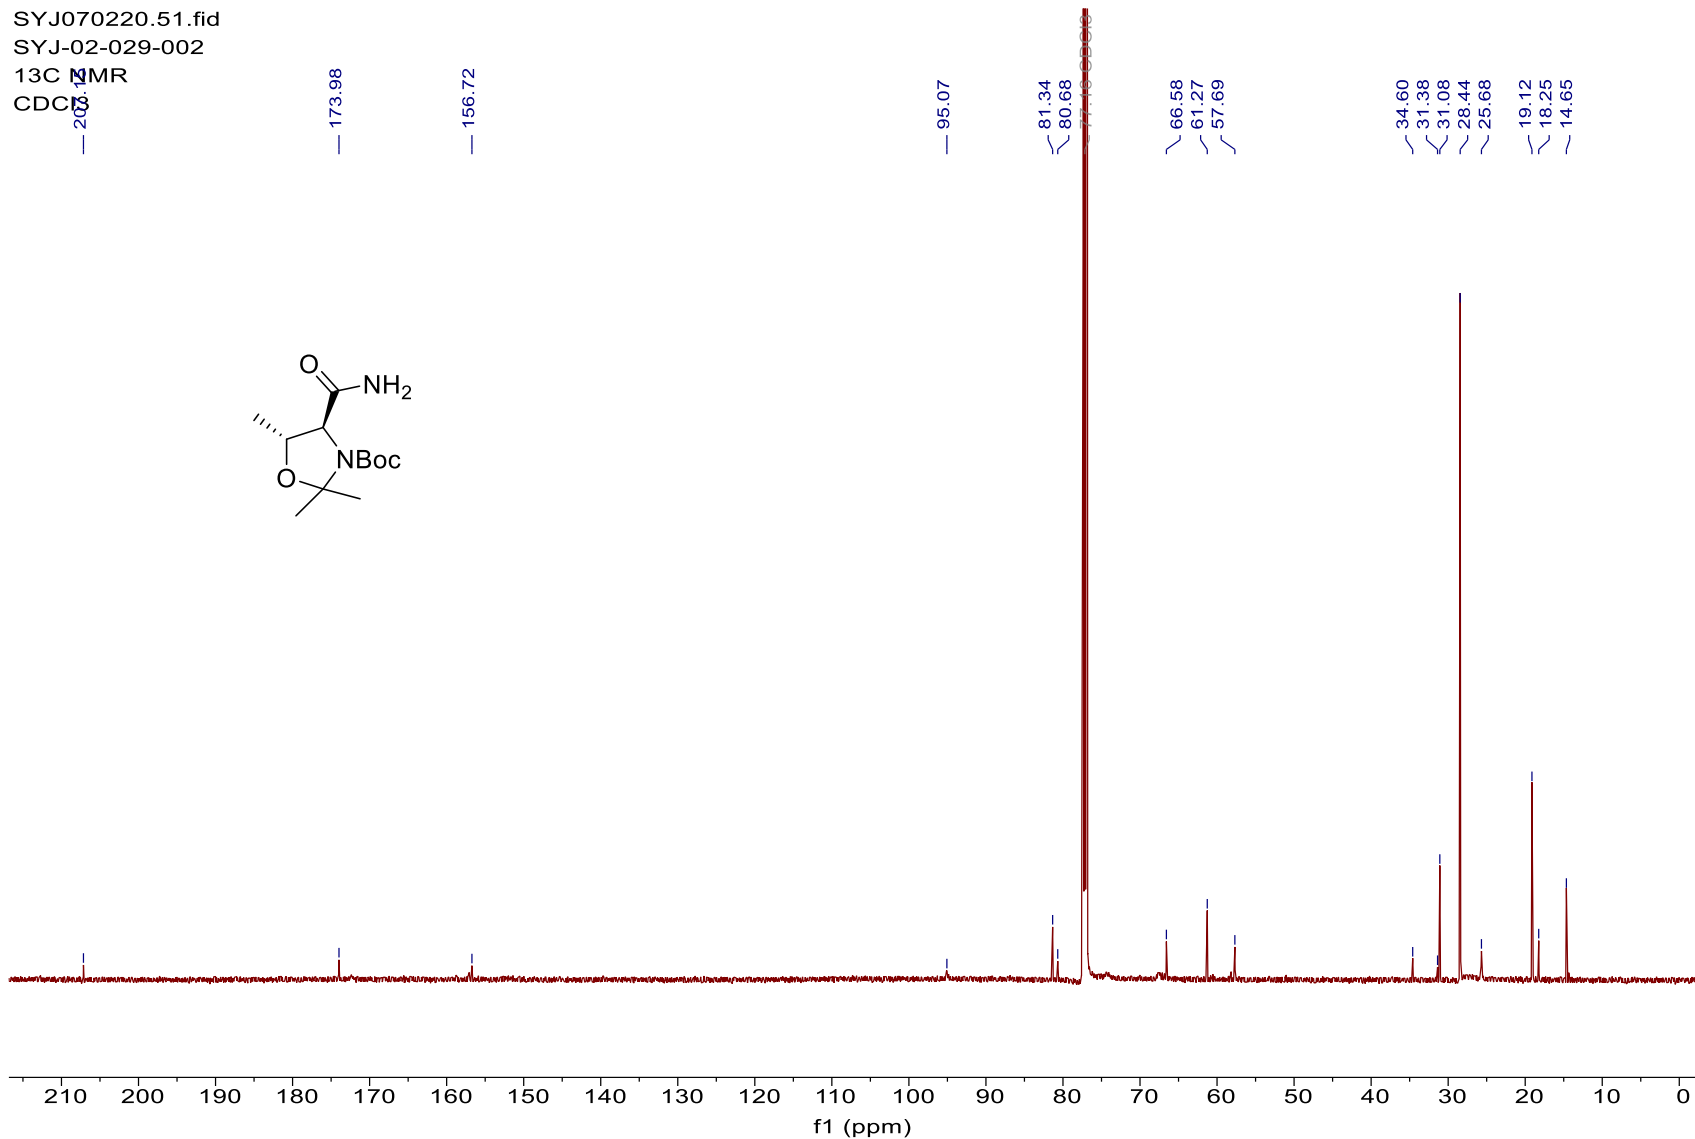

**<sup>13</sup>C-NMR Spectrum of Compound 9 (151 MHz, CDCl<sub>3</sub>)**



SYJ070220.20.fid  
SYJ-02-029-003  
1H NMR  
CDCl3

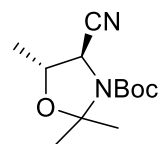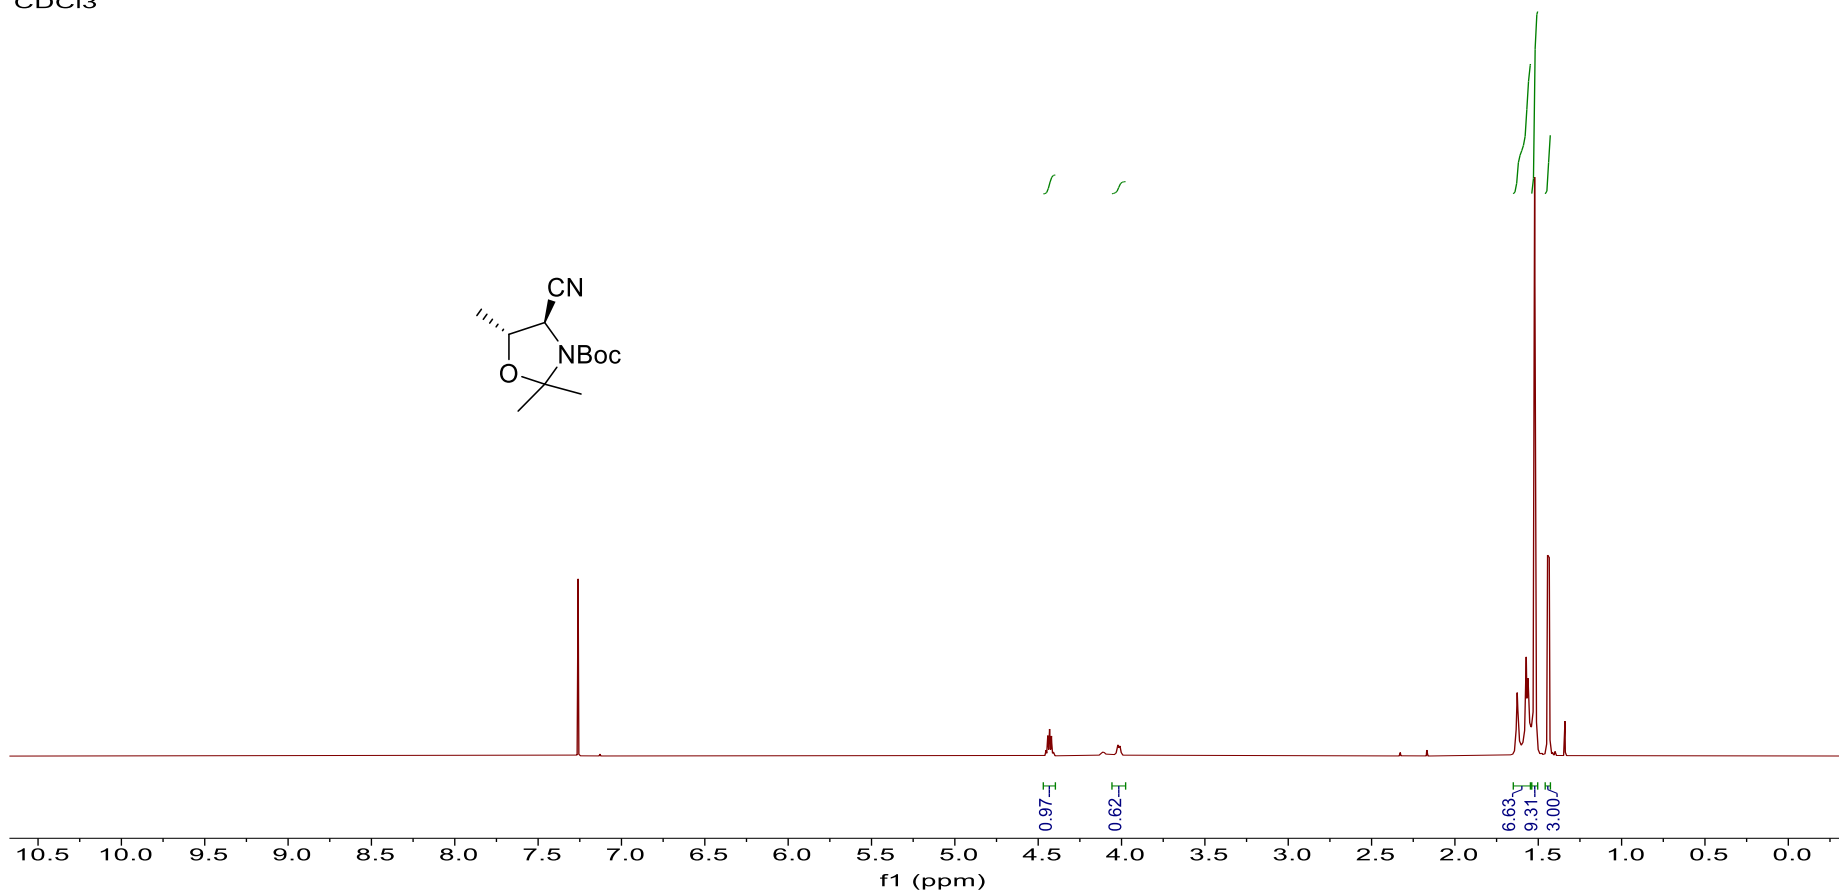

**<sup>1</sup>H-NMR Spectrum of Compound 10 (600 MHz, CDCl<sub>3</sub>)**

SYJ070220.53.fid  
SYJ-02-029-003  
13C NMR  
CDCl3

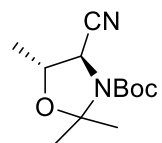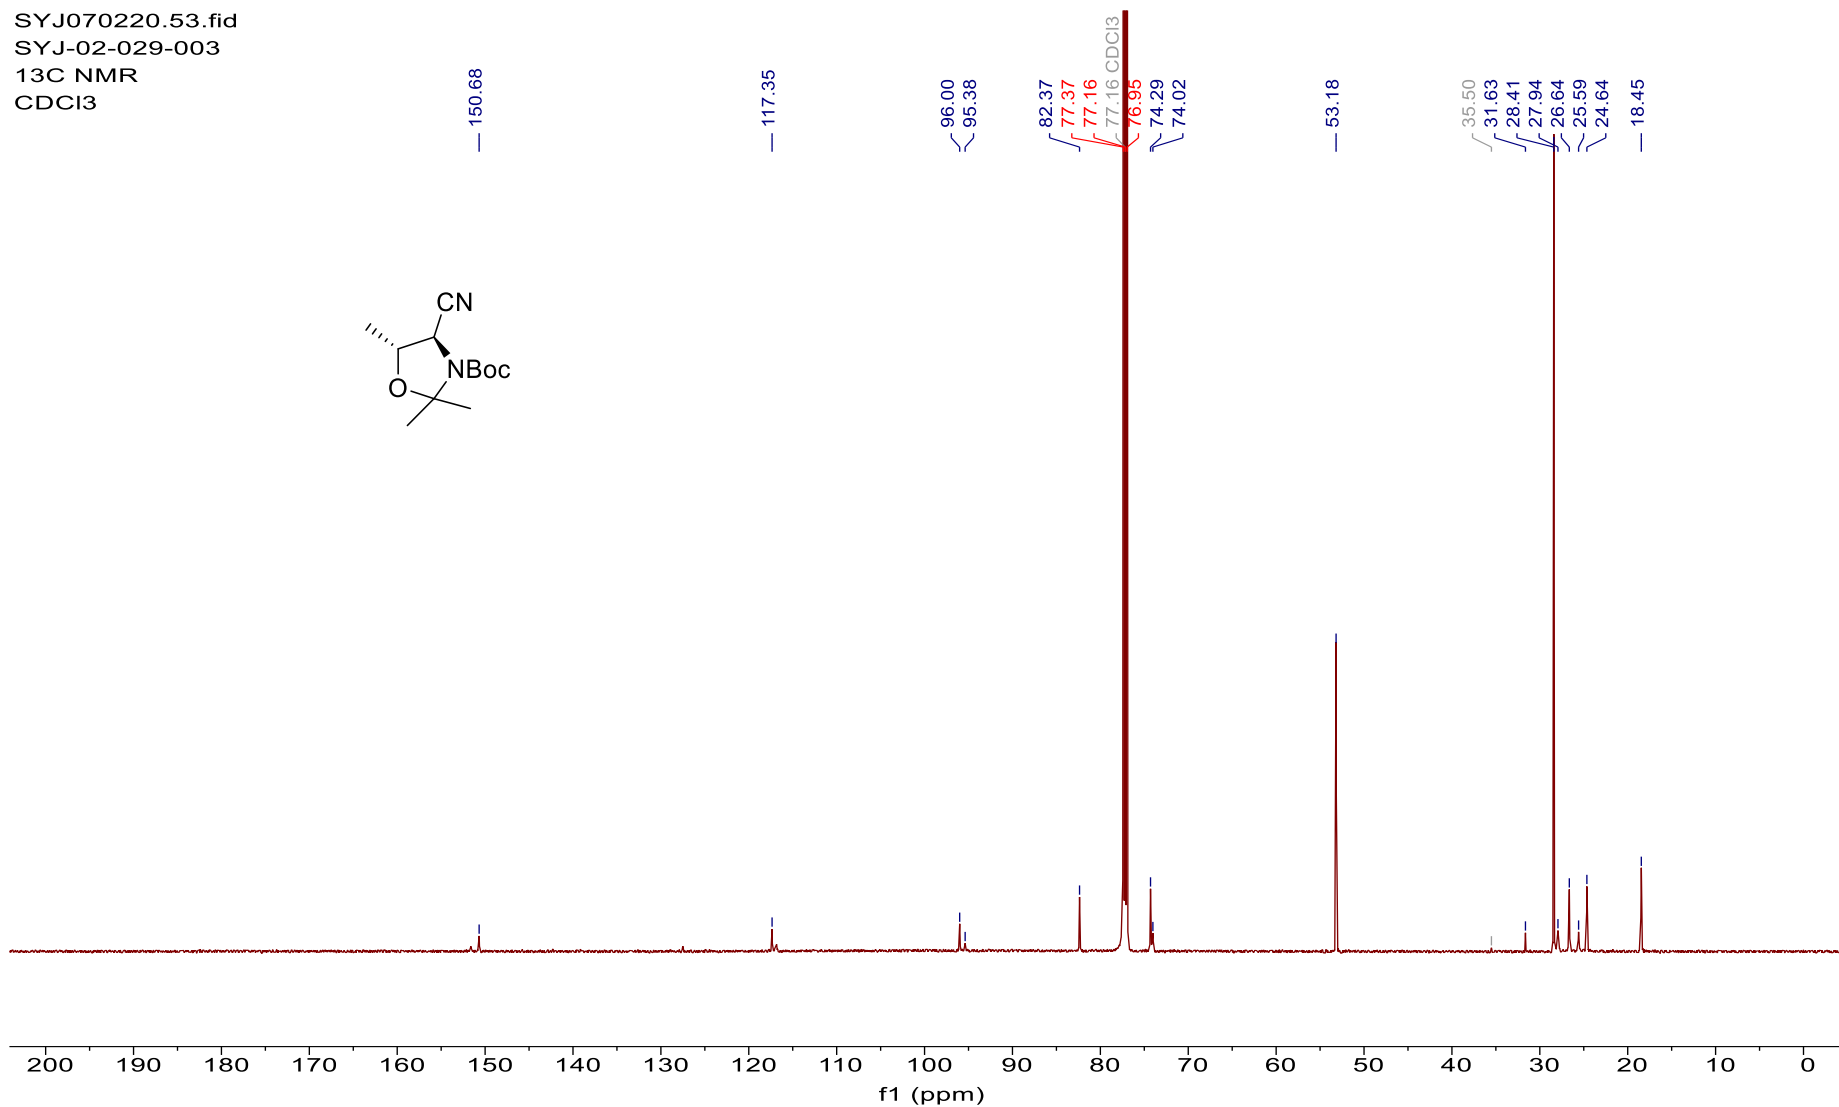

**13C-NMR Spectrum of Compound 10 (151 MHz, CDCl3)**

SYJ080620.30.fid  
SYJ-02-029-004  
1H NMR  
CDCl3

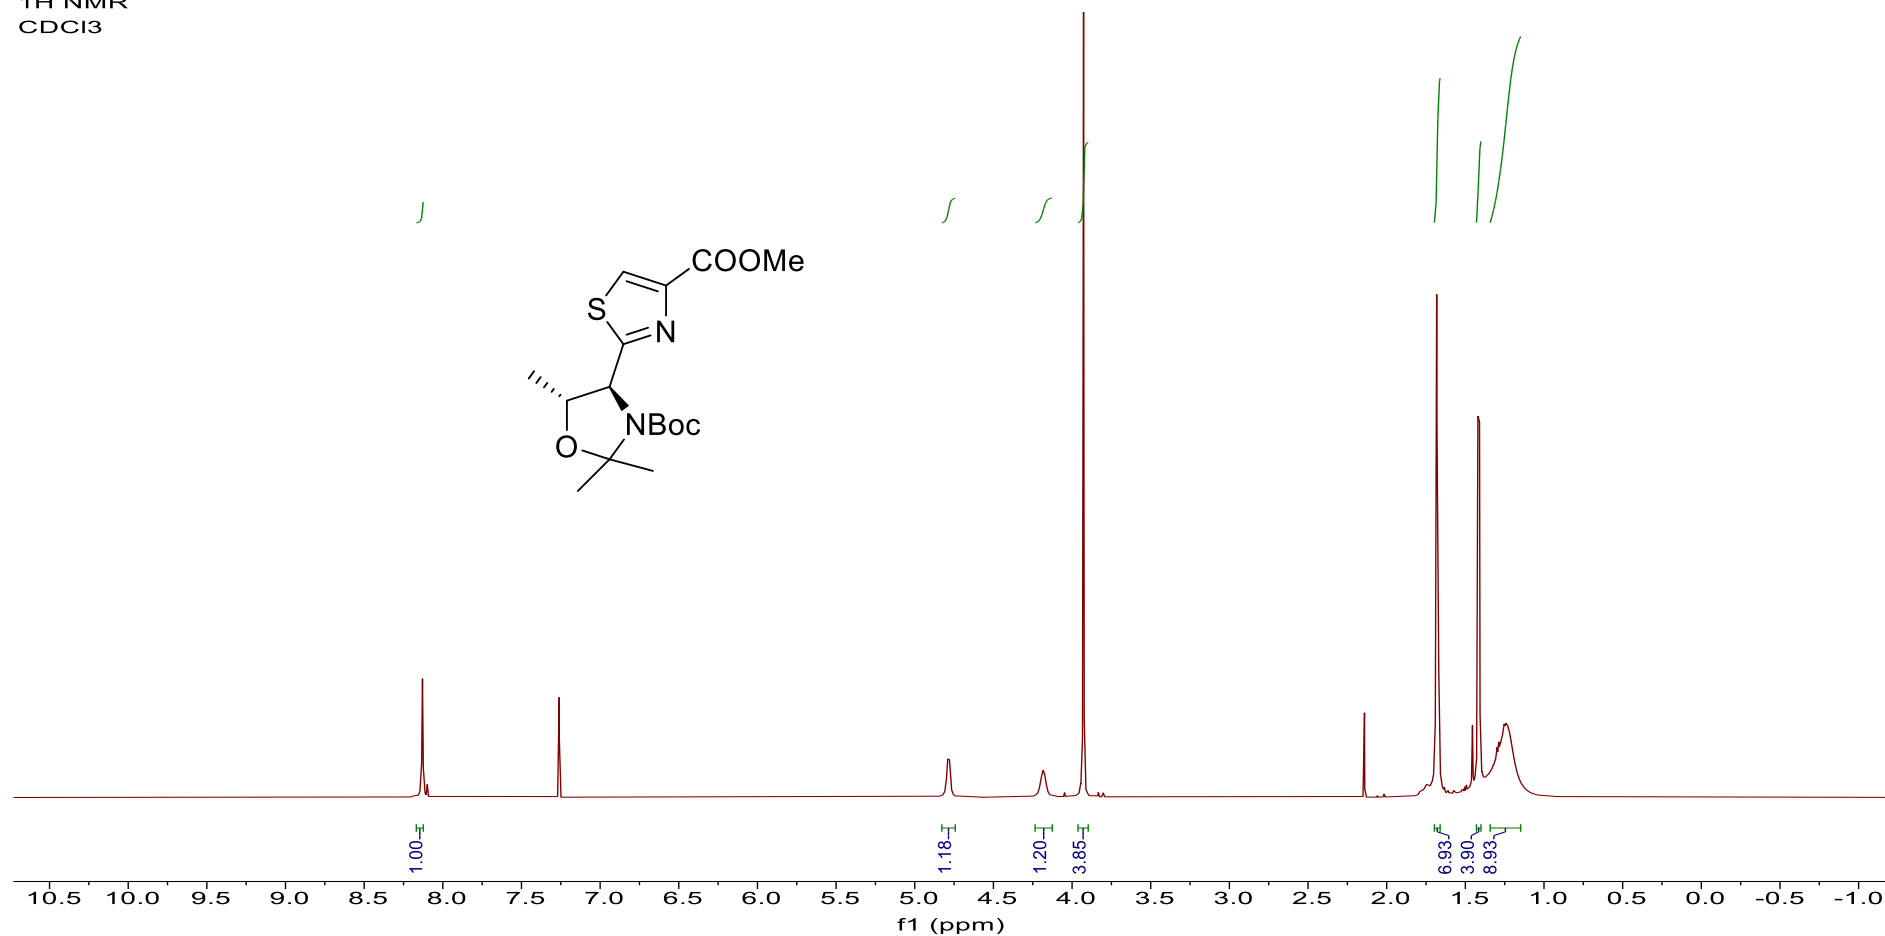

**<sup>1</sup>H-NMR Spectrum of Compound 12 (600 MHz, CDCl<sub>3</sub>, 50 °C)**

SYJ080620.31.fid  
SYJ-02-029-004  
13C NMR  
CDCl3

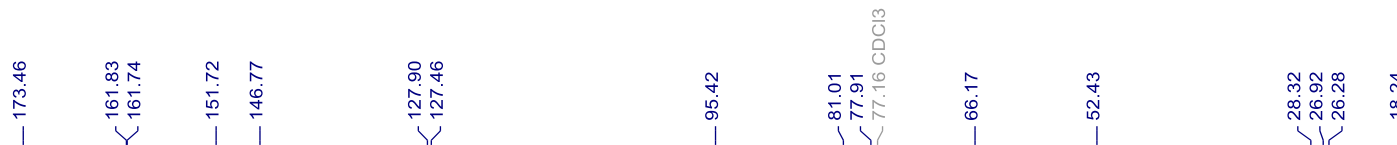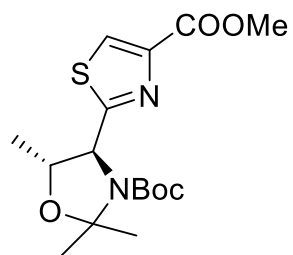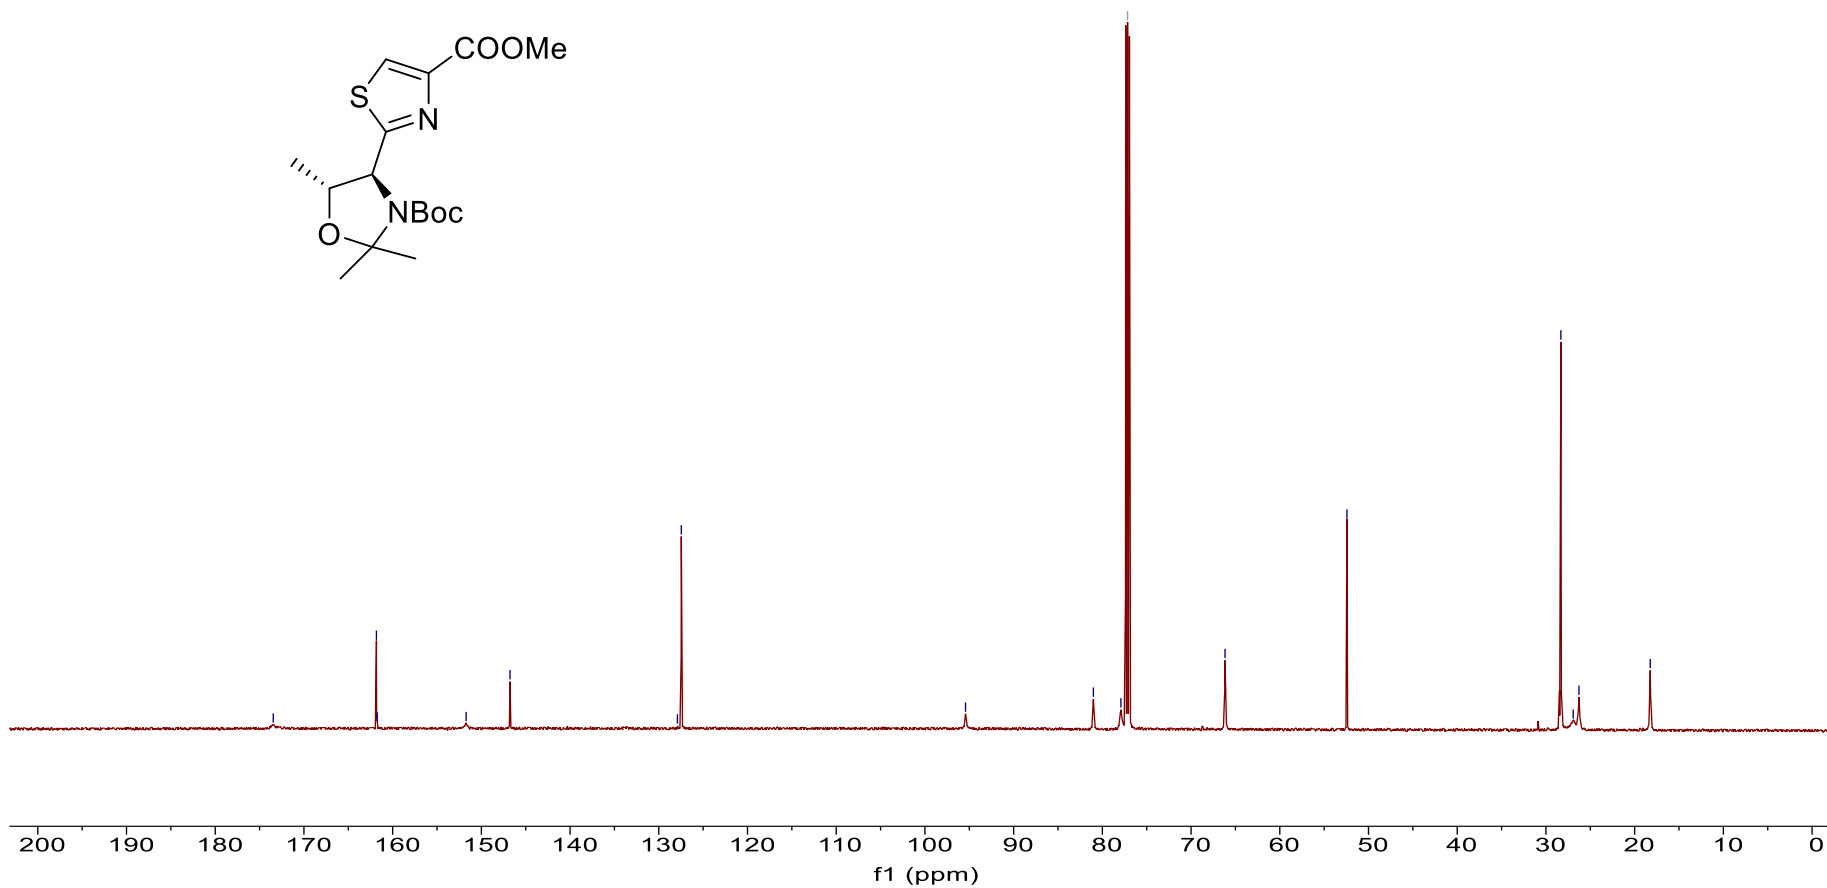

**<sup>13</sup>C-NMR Spectrum of Compound 12 (151 MHz, CDCl<sub>3</sub>, 50 °C)**

SYJ070220.60.fid  
SYJ-02-029-006  
1H NMR  
CDCl3

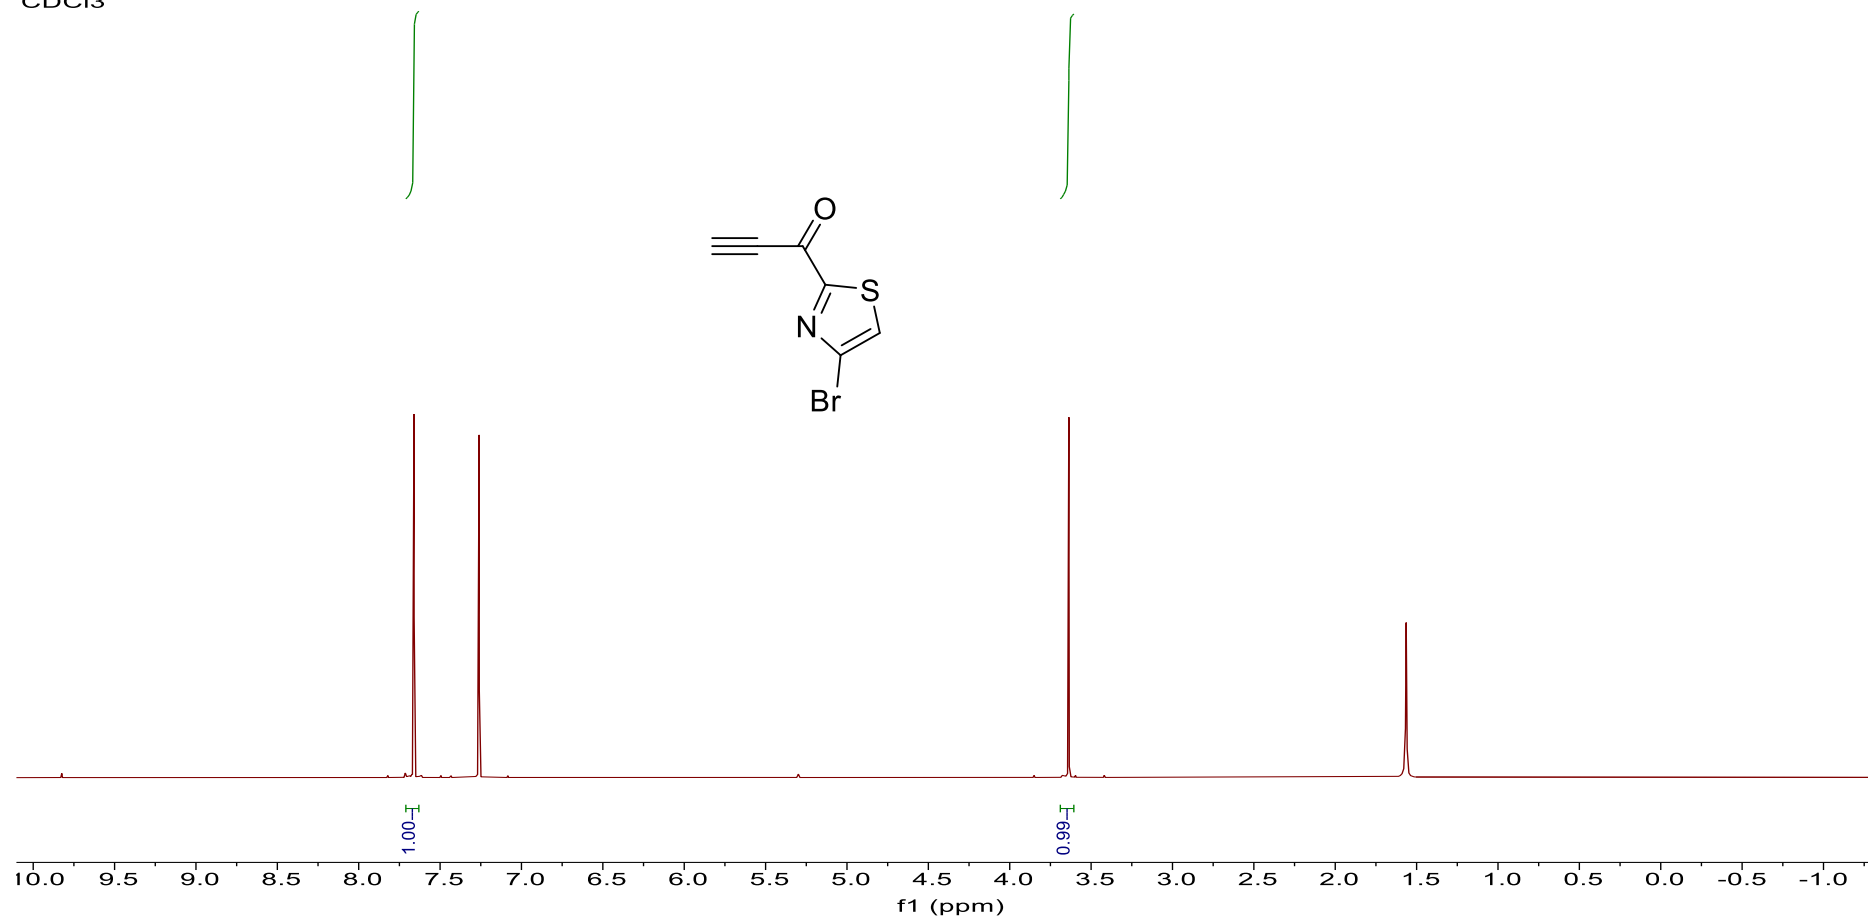

**<sup>1</sup>H-NMR Spectrum of Compound 15 (600 MHz, CDCl<sub>3</sub>)**

SYJ070220.61.fid  
SYJ-02-029-006  
13C NMR  
CDCl3

168.10  
165.84

128.70  
125.94

84.48  
78.94

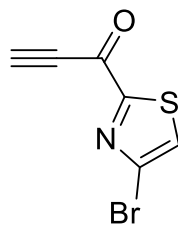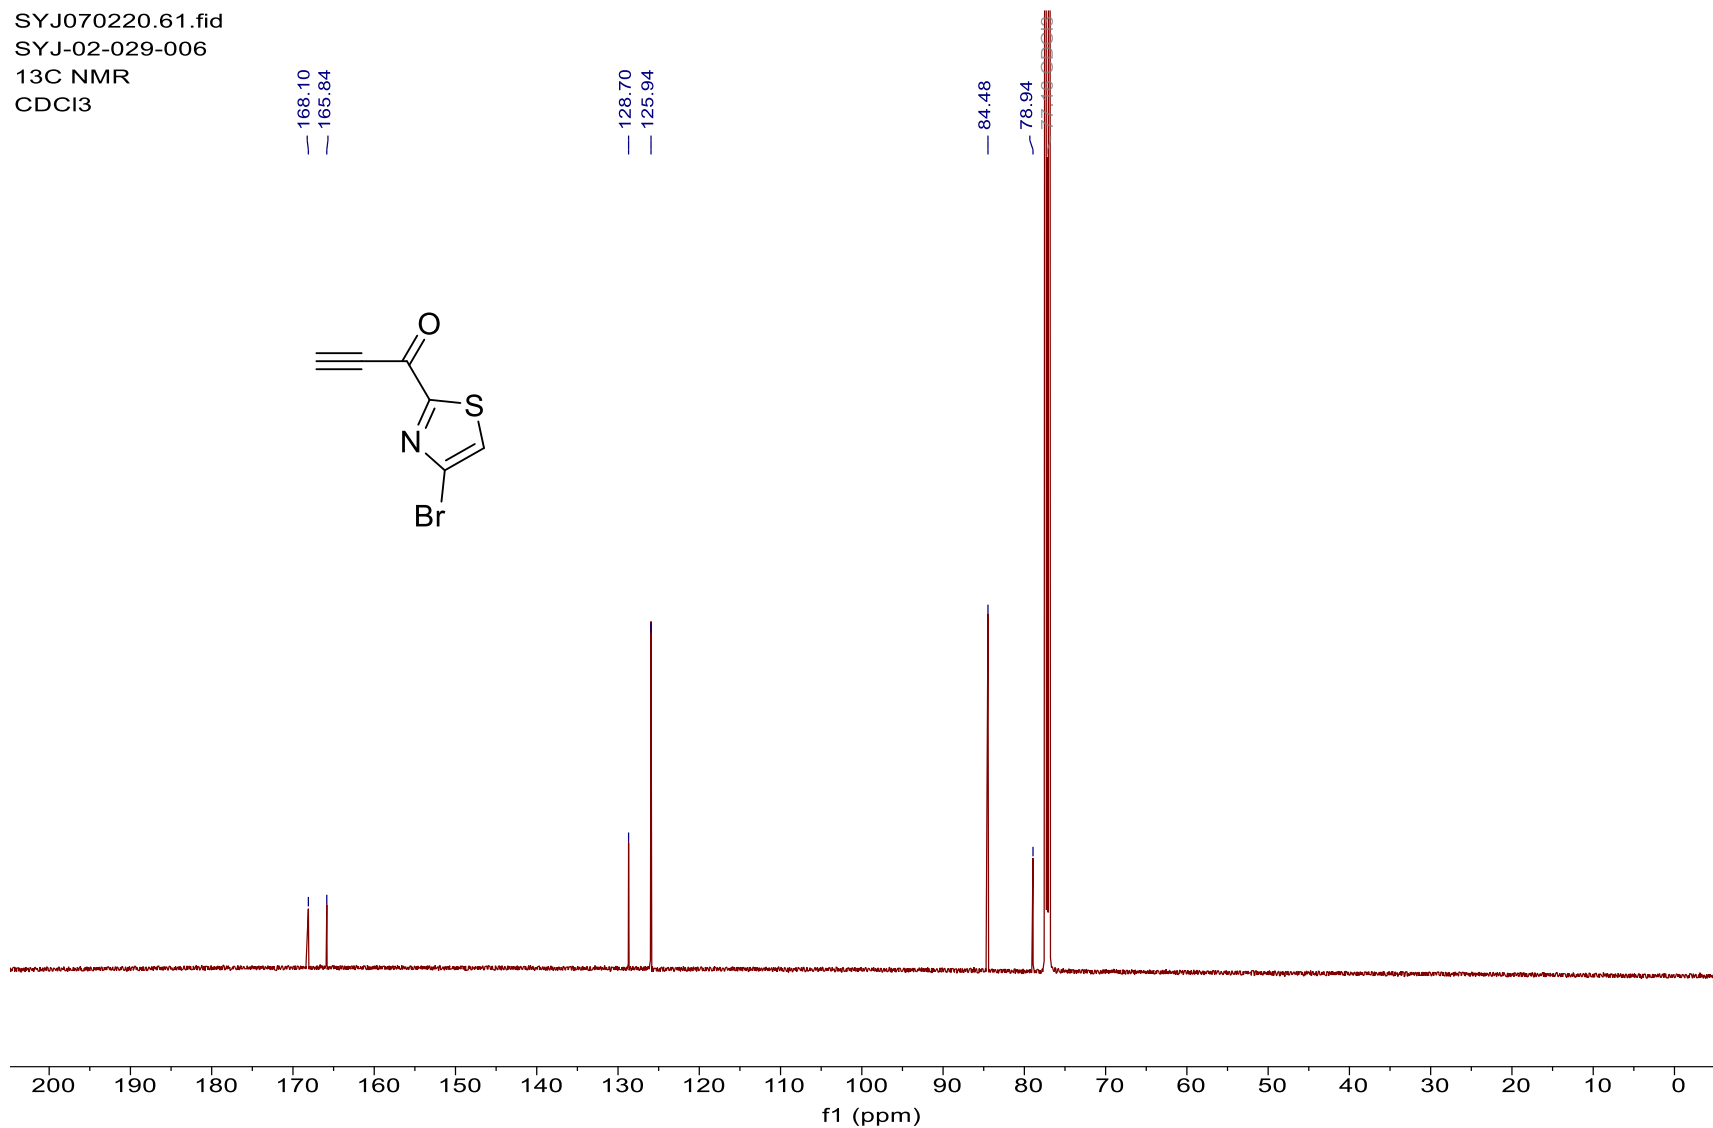

**<sup>13</sup>C-NMR Spectrum of Compound 15 (151 MHz, CDCl<sub>3</sub>)**

SYJ091620.10.fid  
SYJ-02-029-005  
1H NMR  
CDCl<sub>3</sub>

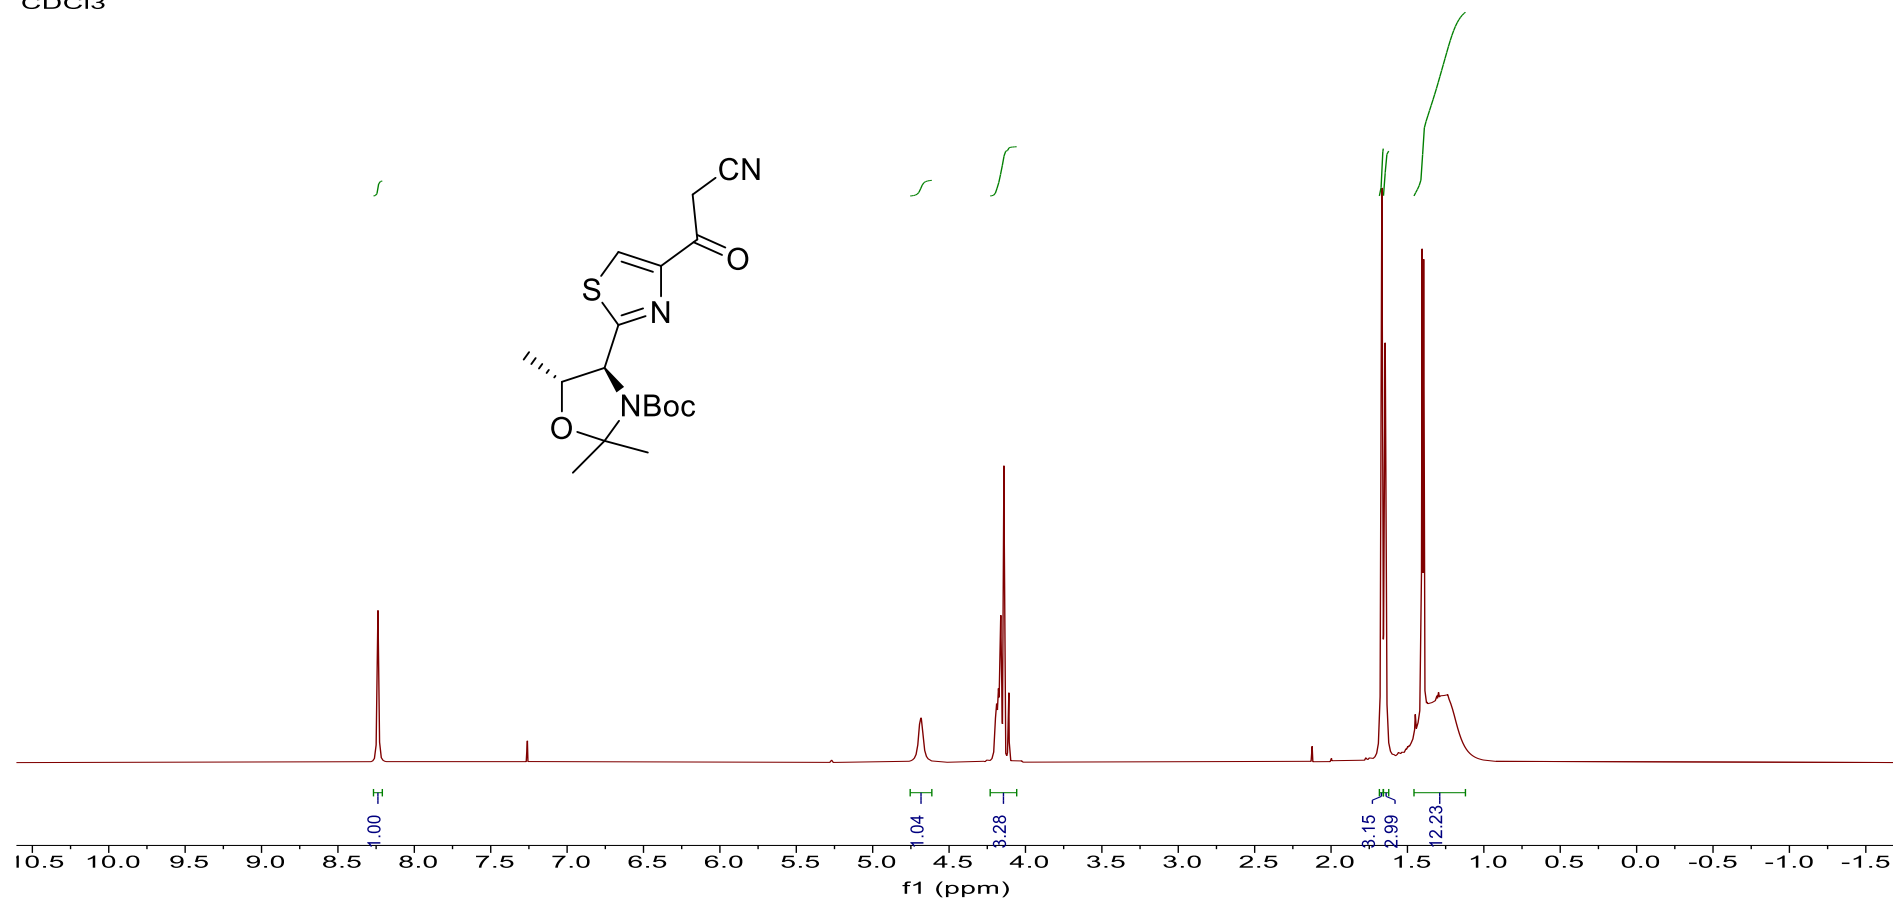

<sup>1</sup>H-NMR Spectrum of Compound 16 (600 MHz, CDCl<sub>3</sub>, 50 °C)

FPKBmGAmSt6XwmCMzTrFiw.12.fid

SYJ-02-029-005

13C NMR

CDCl<sub>3</sub>

206.48 182.17 173.22 151.64 127.27 113.74 95.38 81.15 77.16 CDCl<sub>3</sub> 68.62 65.87 30.40 28.27 26.03 18.04

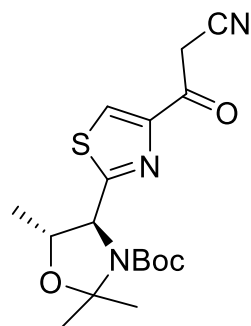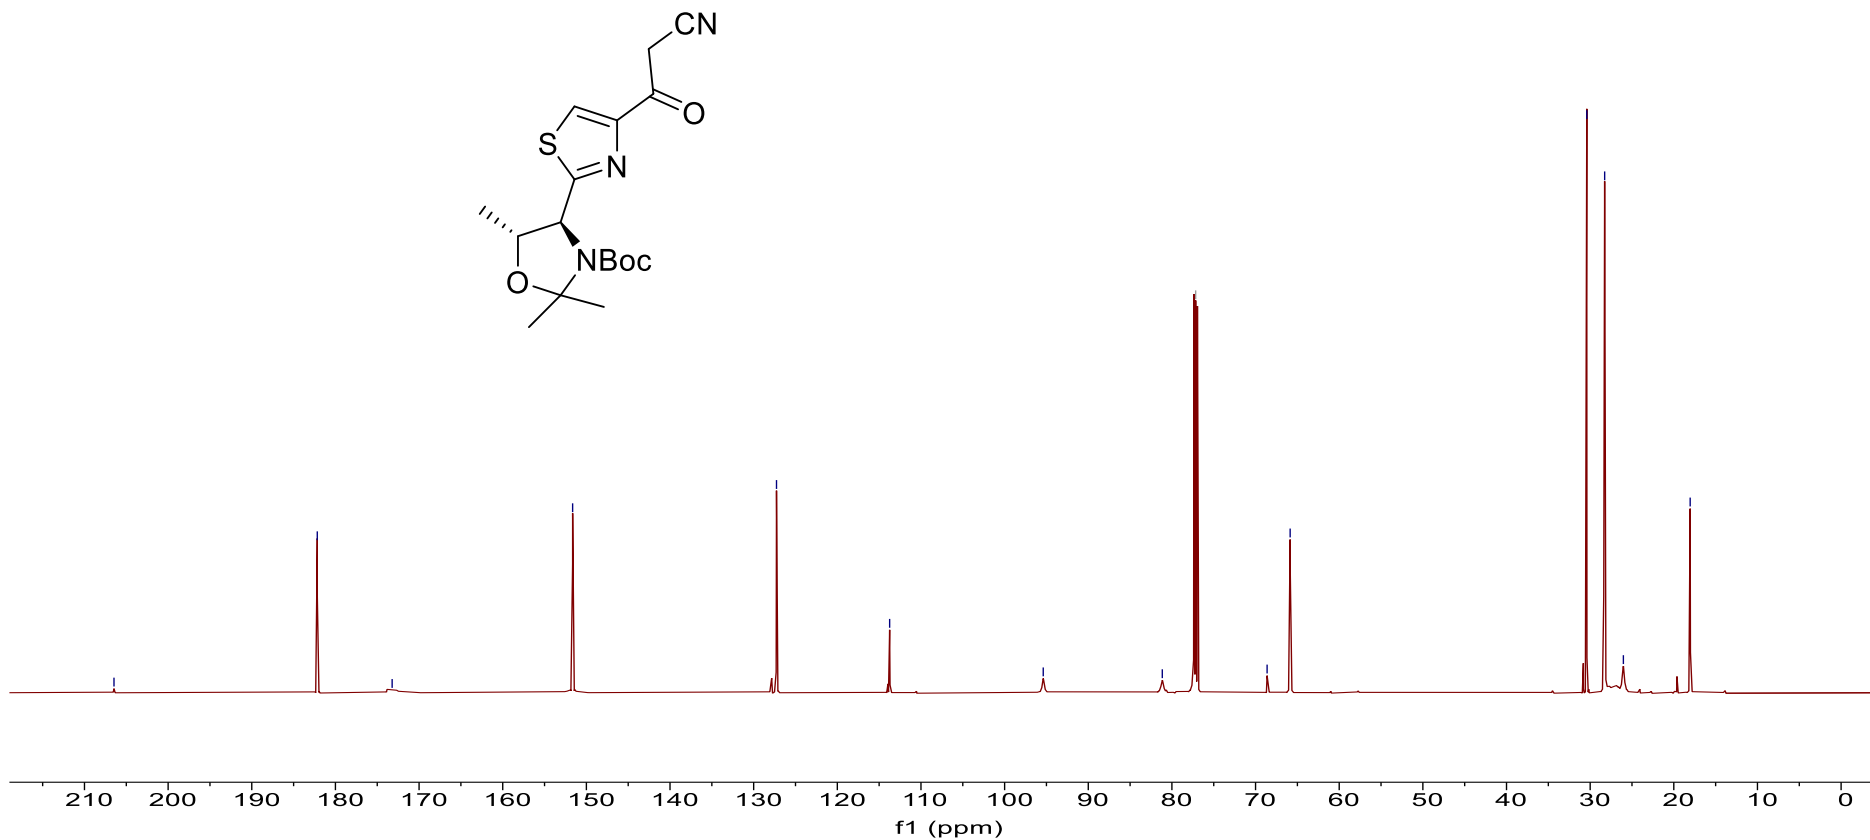

<sup>13</sup>C-NMR Spectrum of Compound 16 (151 MHz, CDCl<sub>3</sub>, 50 °C)



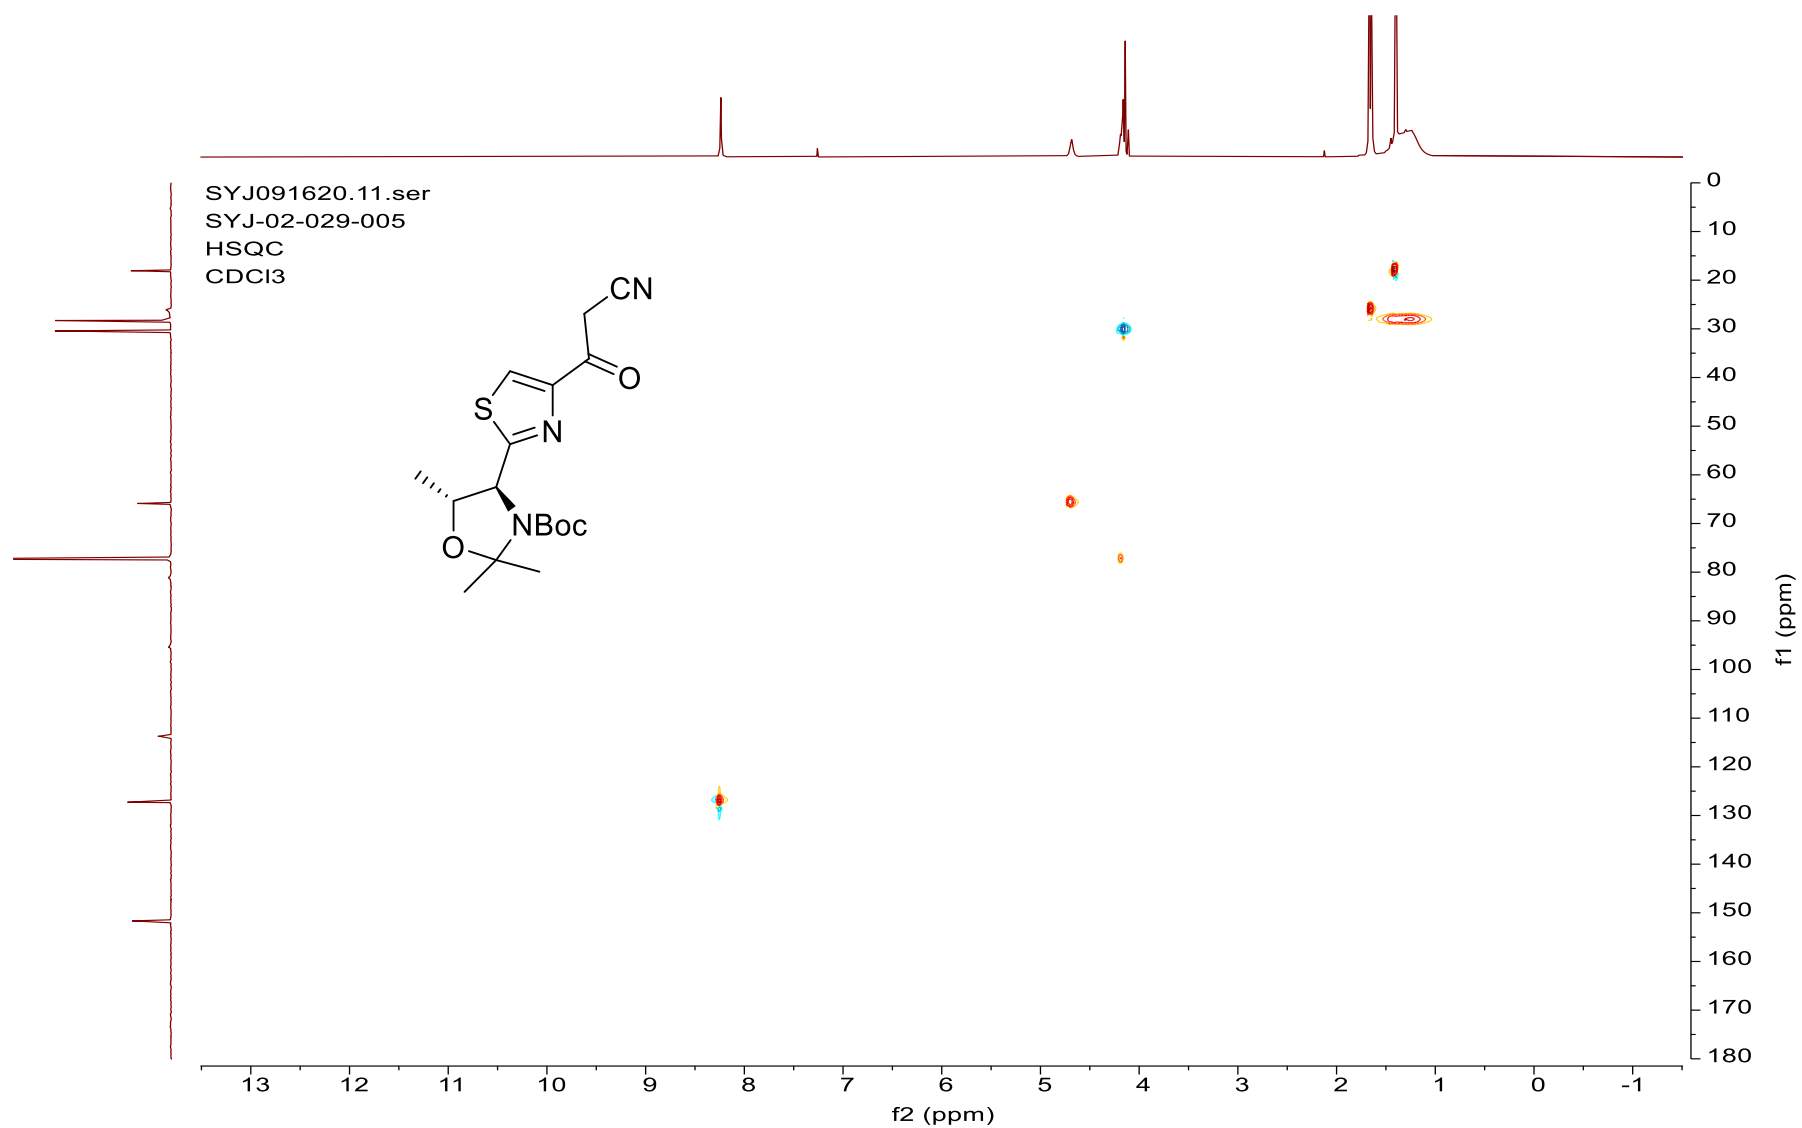**HSQC Spectrum of Compound 16 (600 MHz, CDCl<sub>3</sub>)**

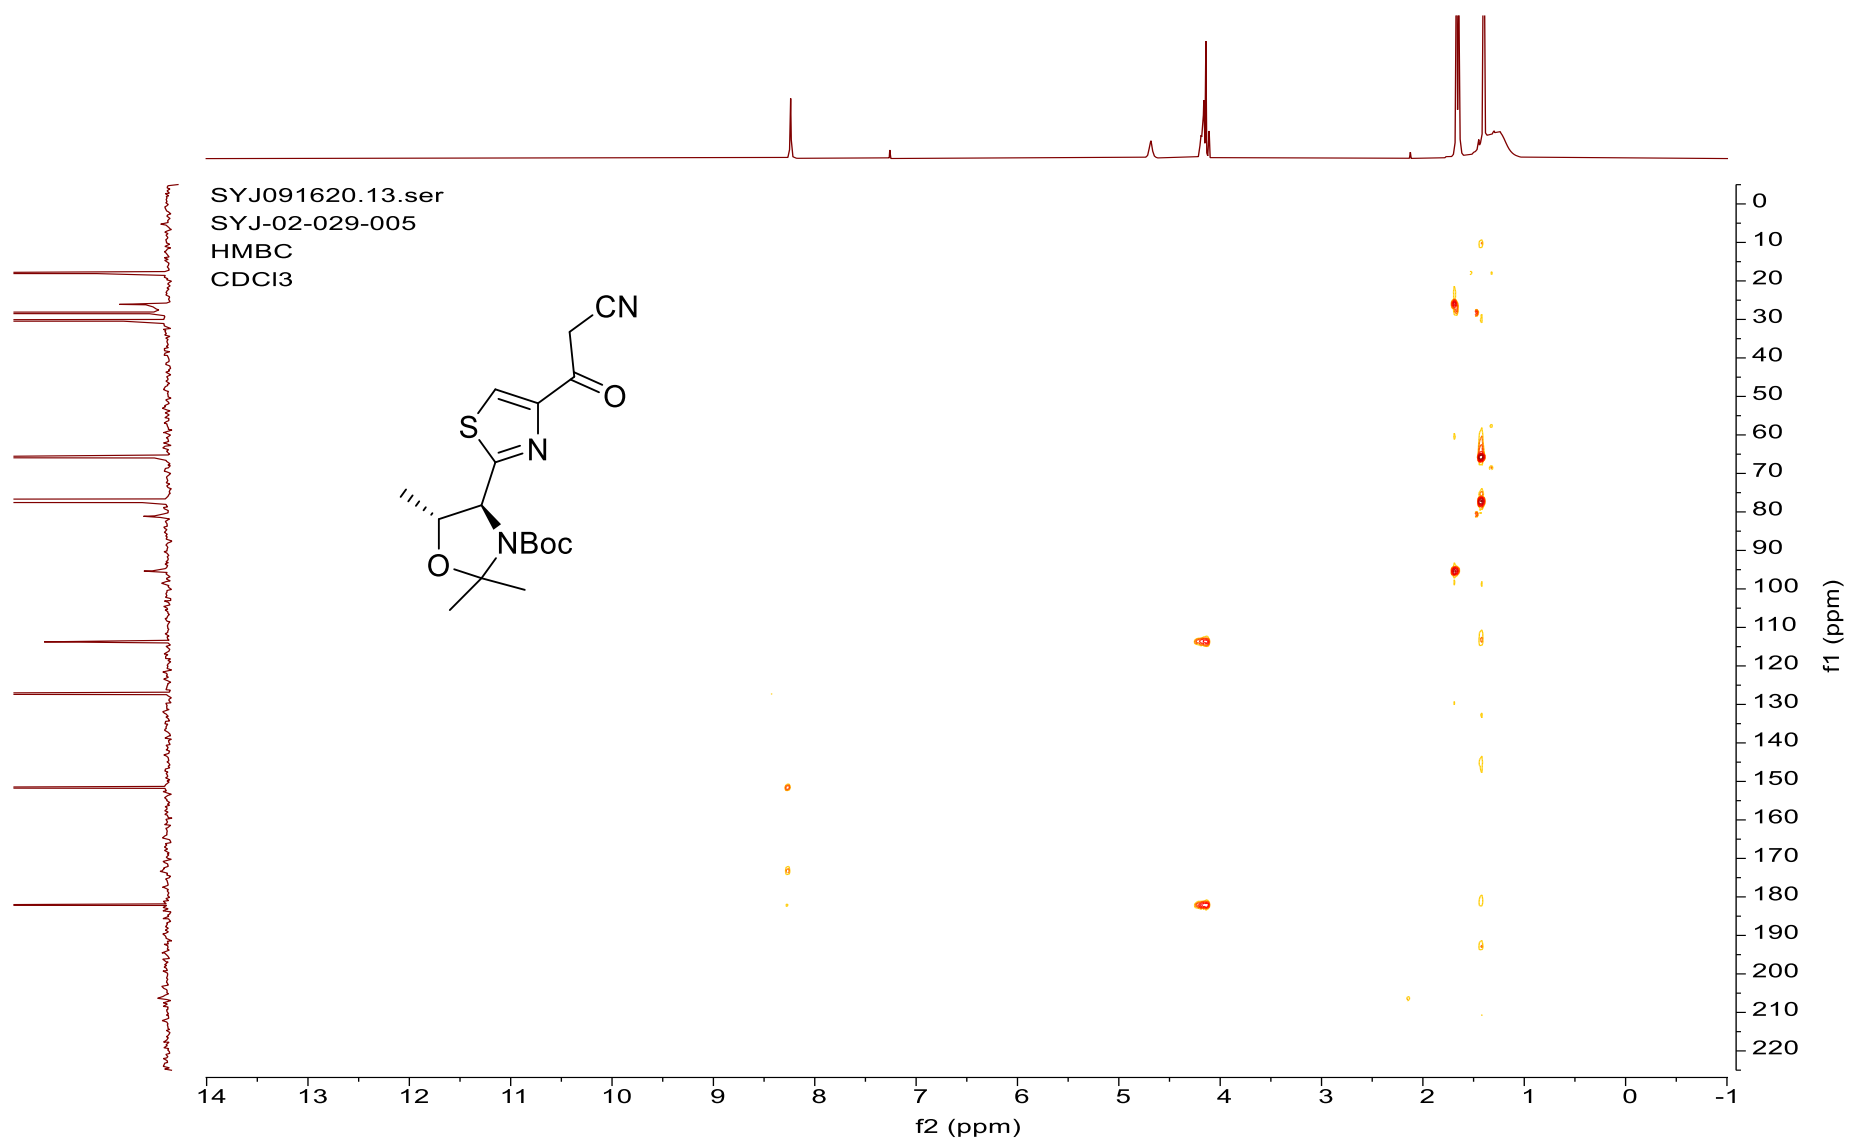HMBC Spectrum of Compound 16 (600 MHz, CDCl<sub>3</sub>)

SYJ080620.62.fid  
SYJ-02-032-002  
1H NMR  
CDCl3

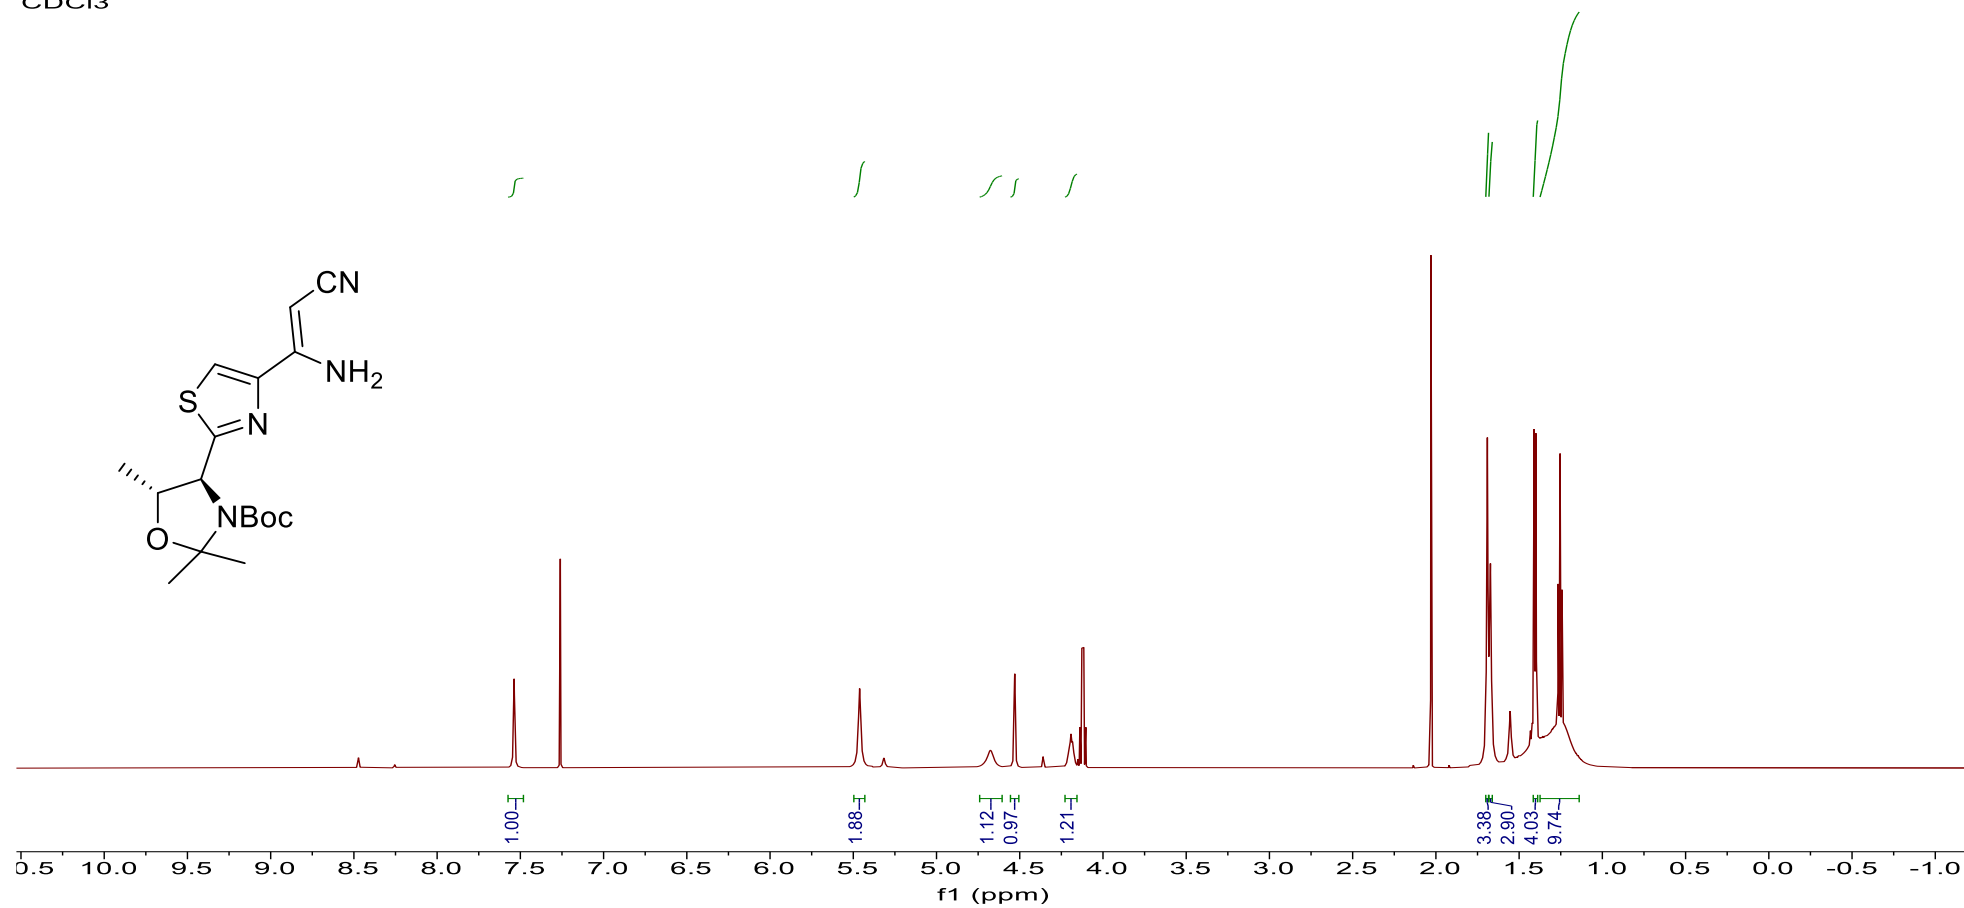

**<sup>1</sup>H-NMR Spectrum of Compound 17 (600 MHz, CDCl<sub>3</sub>, 50 °C)**

SYJ080620.61.fid  
SYJ-02-032-002  
13C NMR  
CDCl3

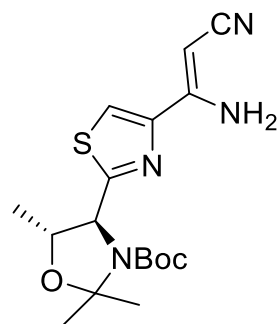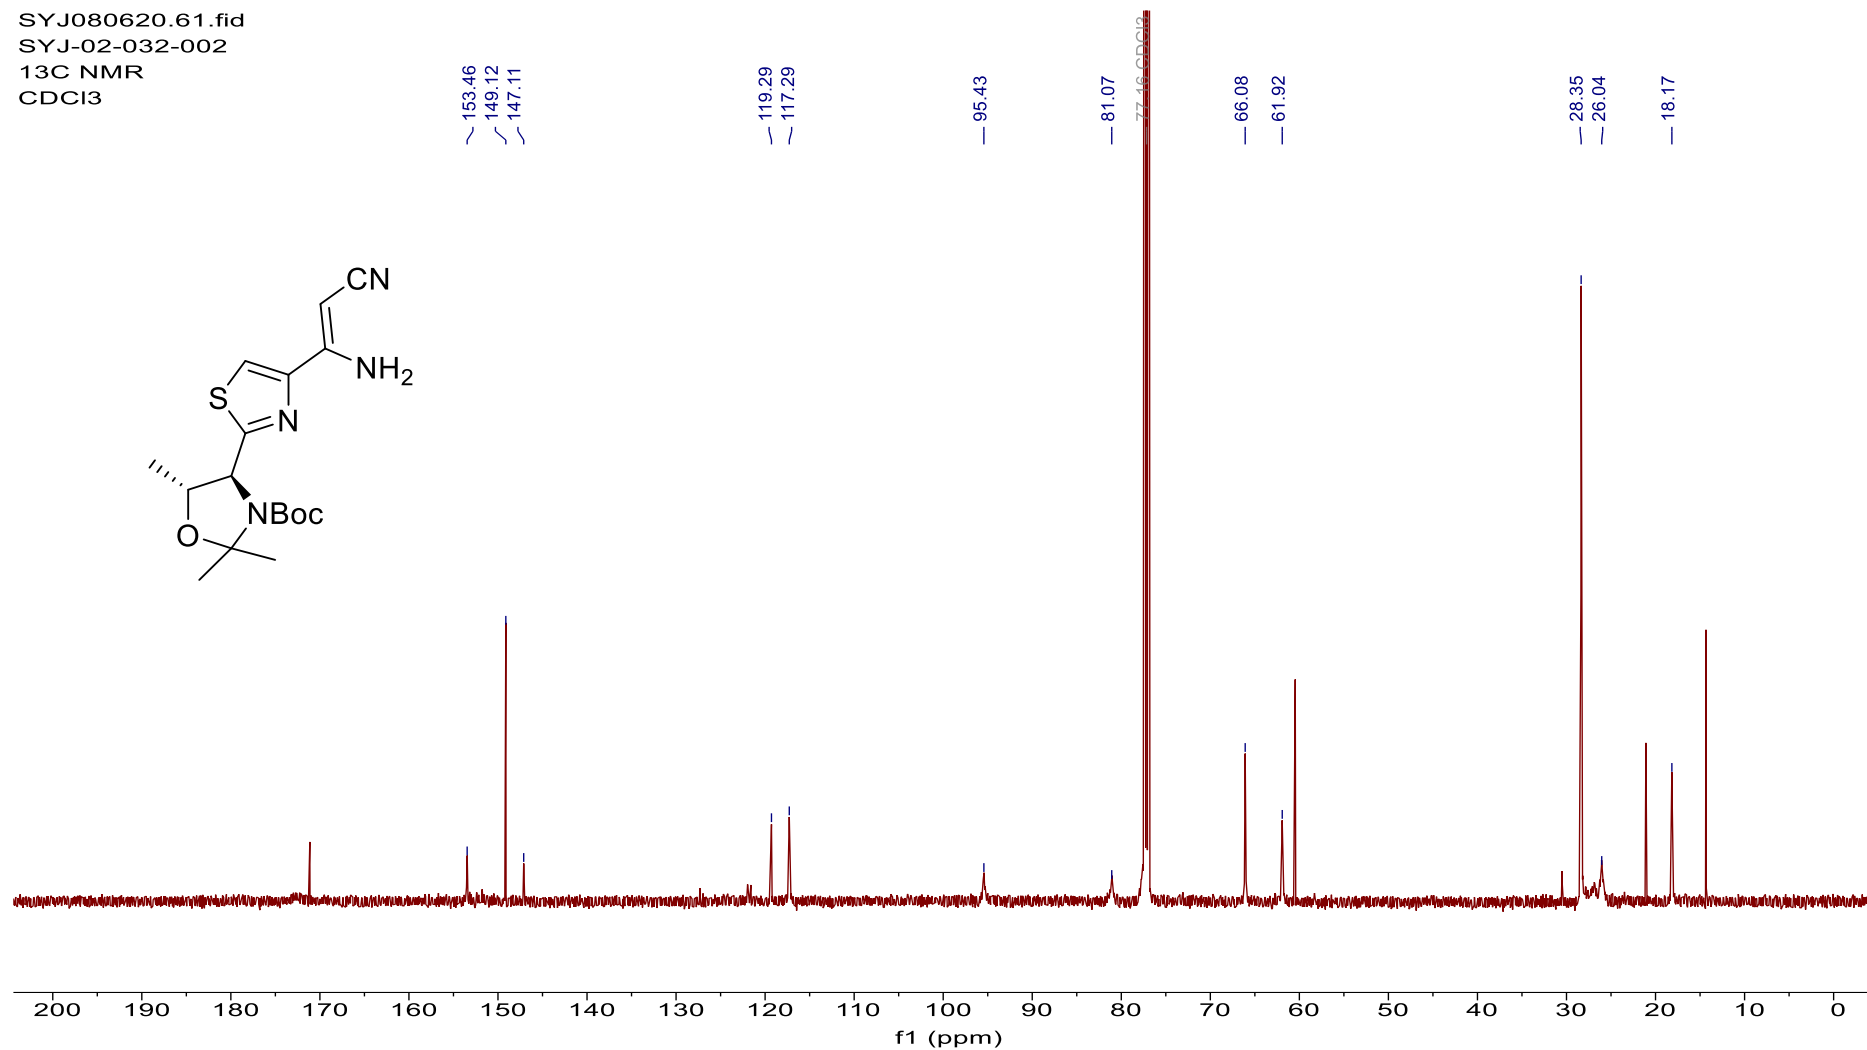

<sup>13</sup>C-NMR Spectrum of Compound 17 (151 MHz, CDCl<sub>3</sub>, 50 °C)

SYJ080620.52.fid  
SYJ-02-029-007  
1H NMR  
CDCl3

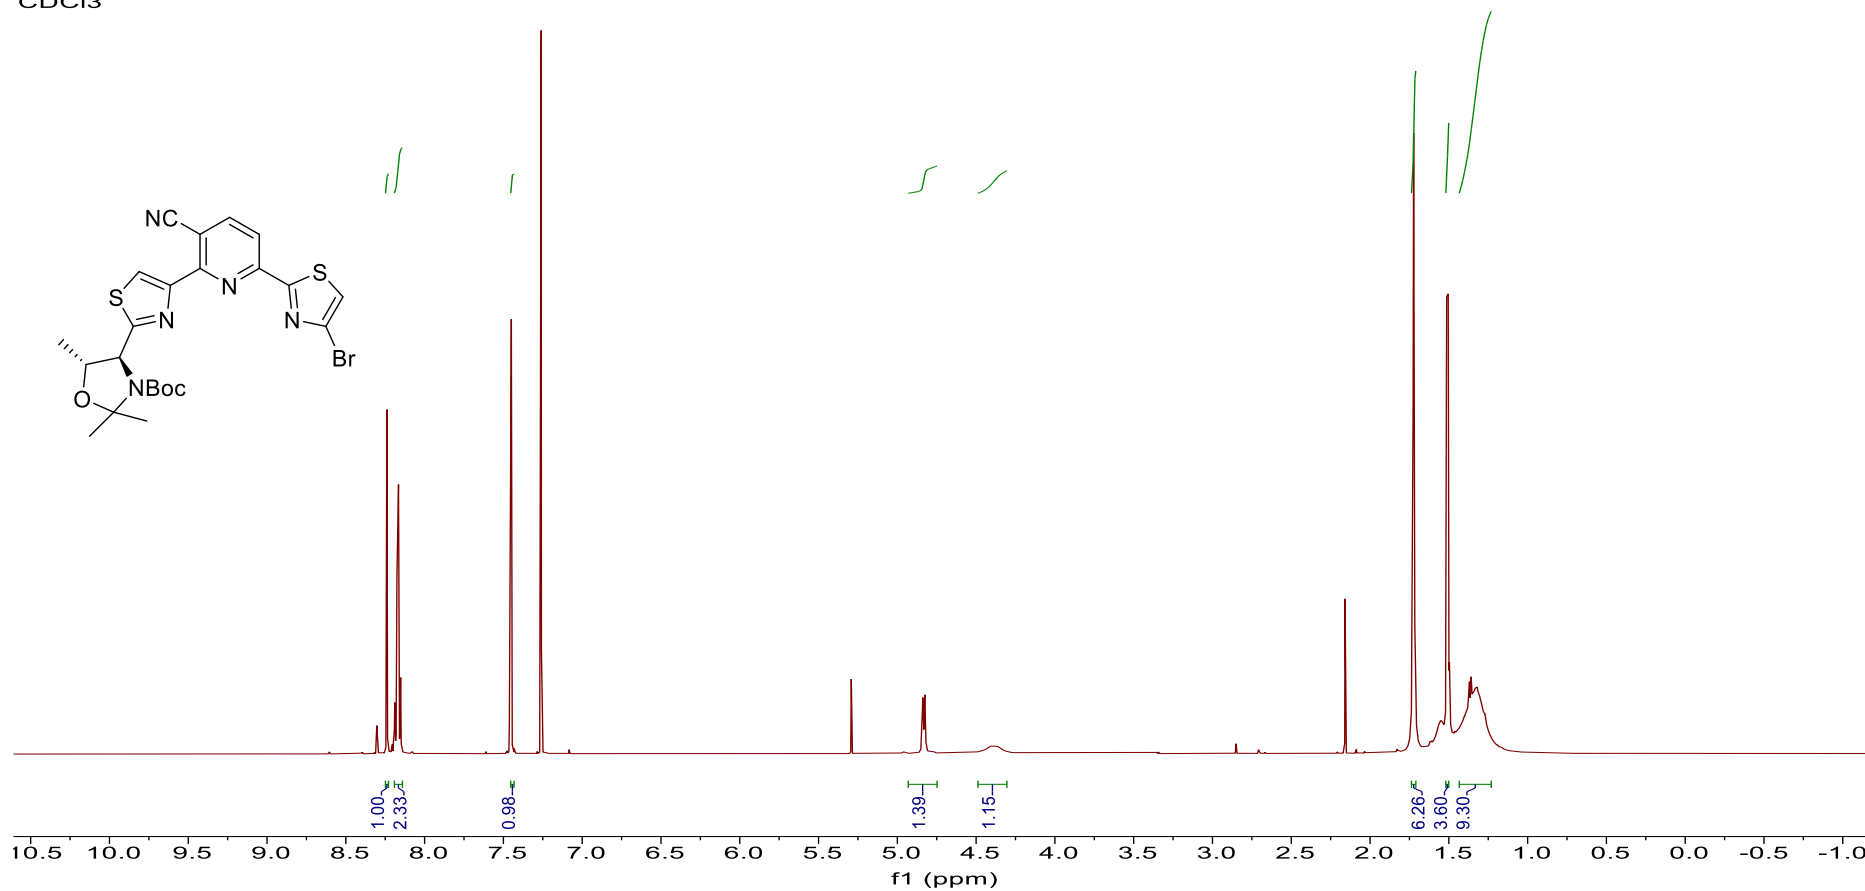

**<sup>1</sup>H-NMR Spectrum of Compound 18 (600 MHz, CDCl<sub>3</sub>, 50 °C)**

SYJ080620.53.fid  
 SYJ-02-029-007  
 13C NMR  
 CDCl3

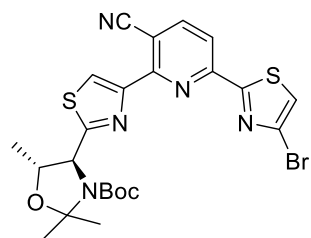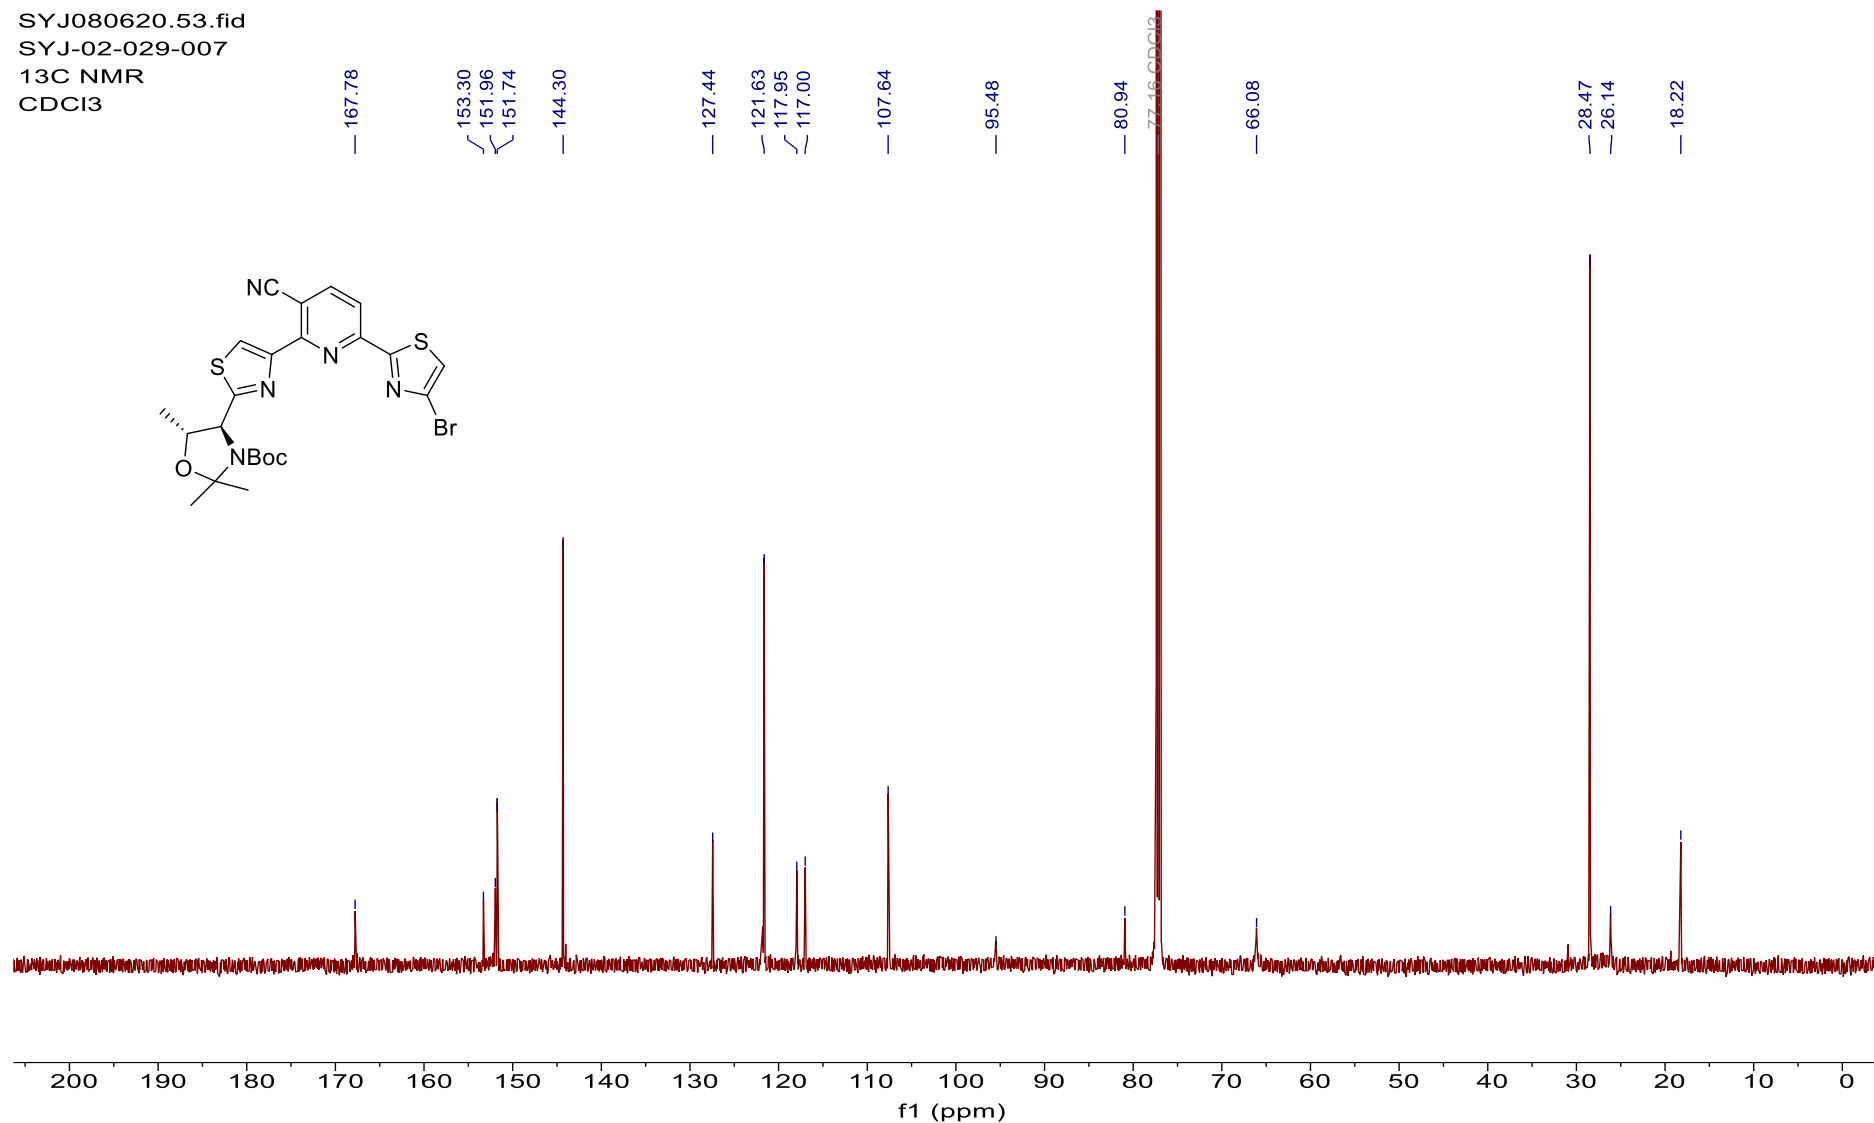

**<sup>13</sup>C-NMR Spectrum of Compound 18 (151 MHz, CDCl<sub>3</sub>, 50 °C)**

00623

ROTUN CDCI3 {C:\wdata\WLS} nmrsun6

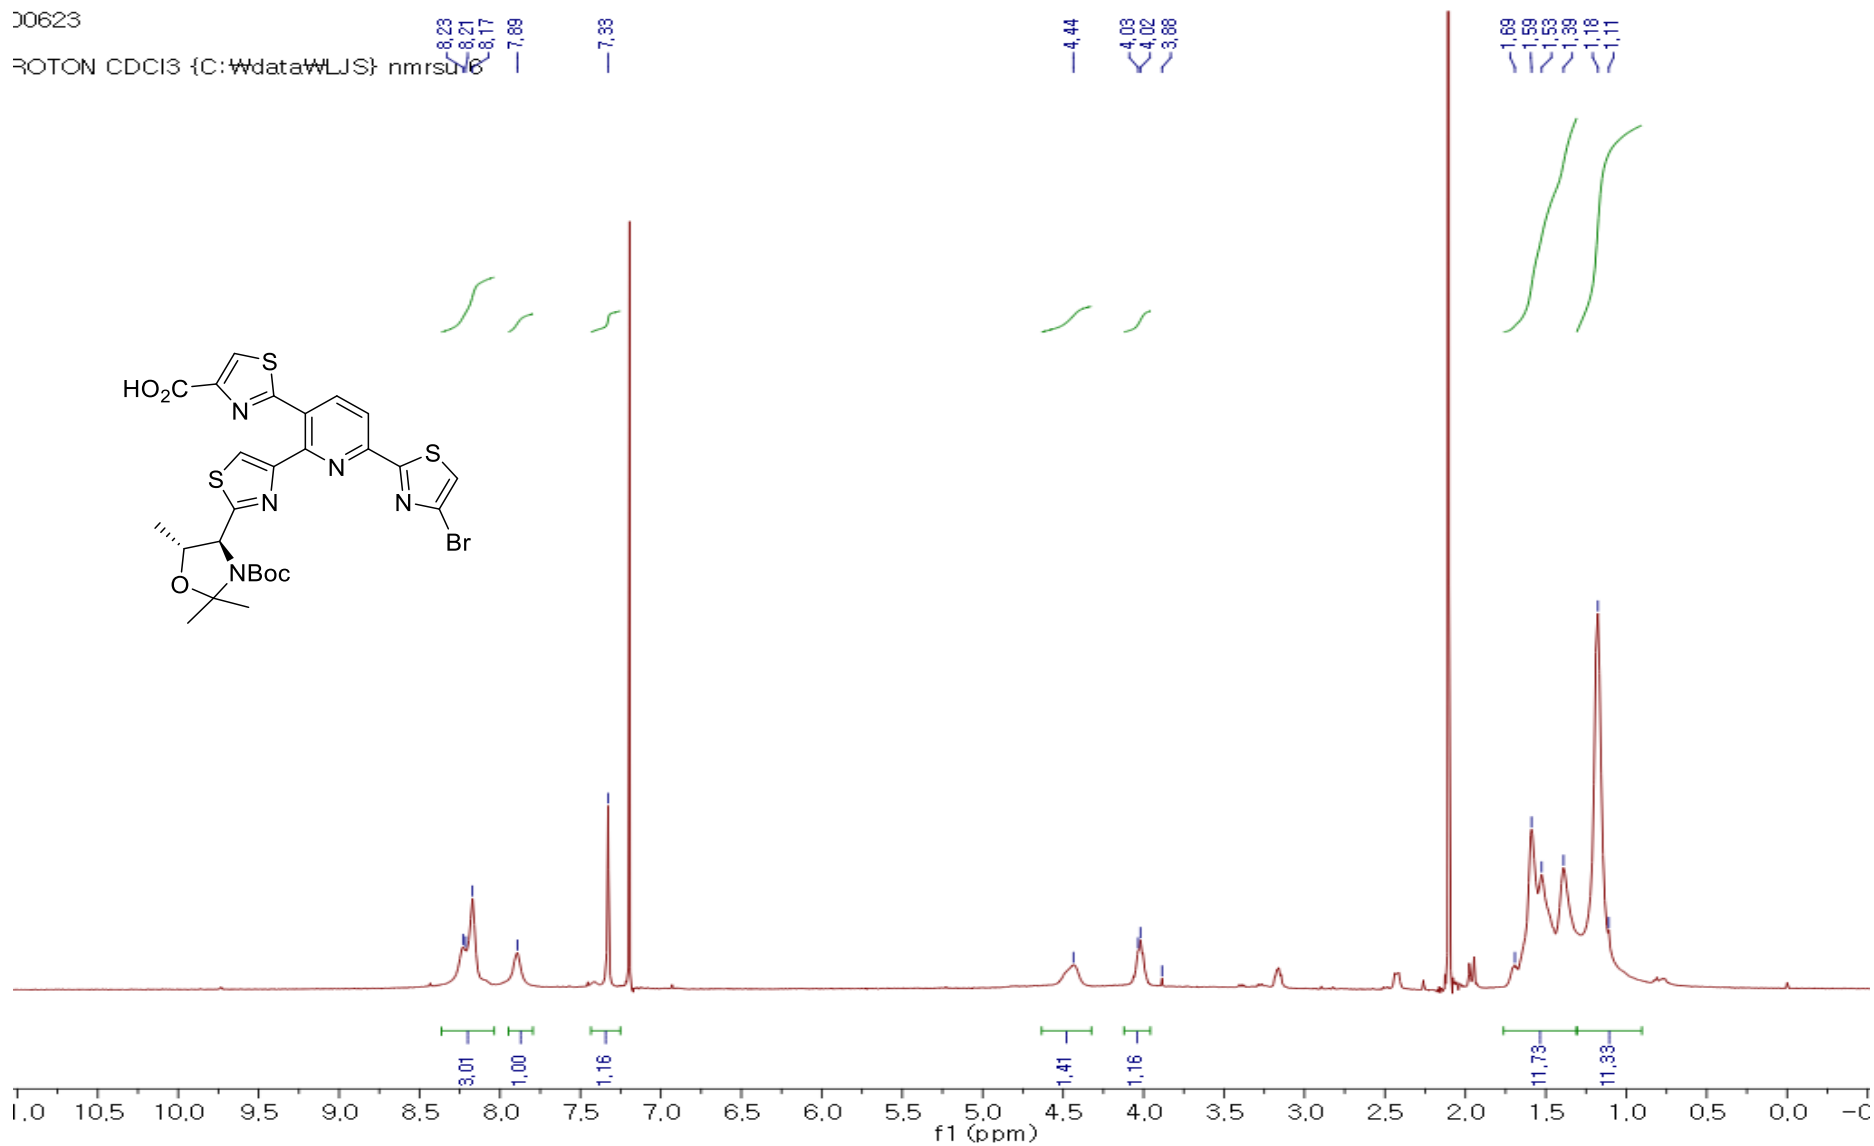

**<sup>1</sup>H-NMR Spectrum of Compound 6 (400 MHz, CDCl<sub>3</sub>)**

compound 6

C13CPD CDCl3 (C: wdata-whip1 nmr su 12

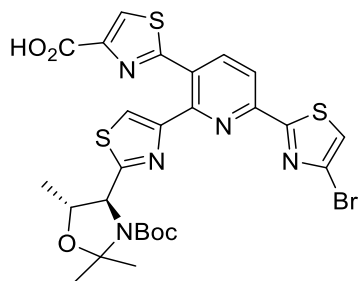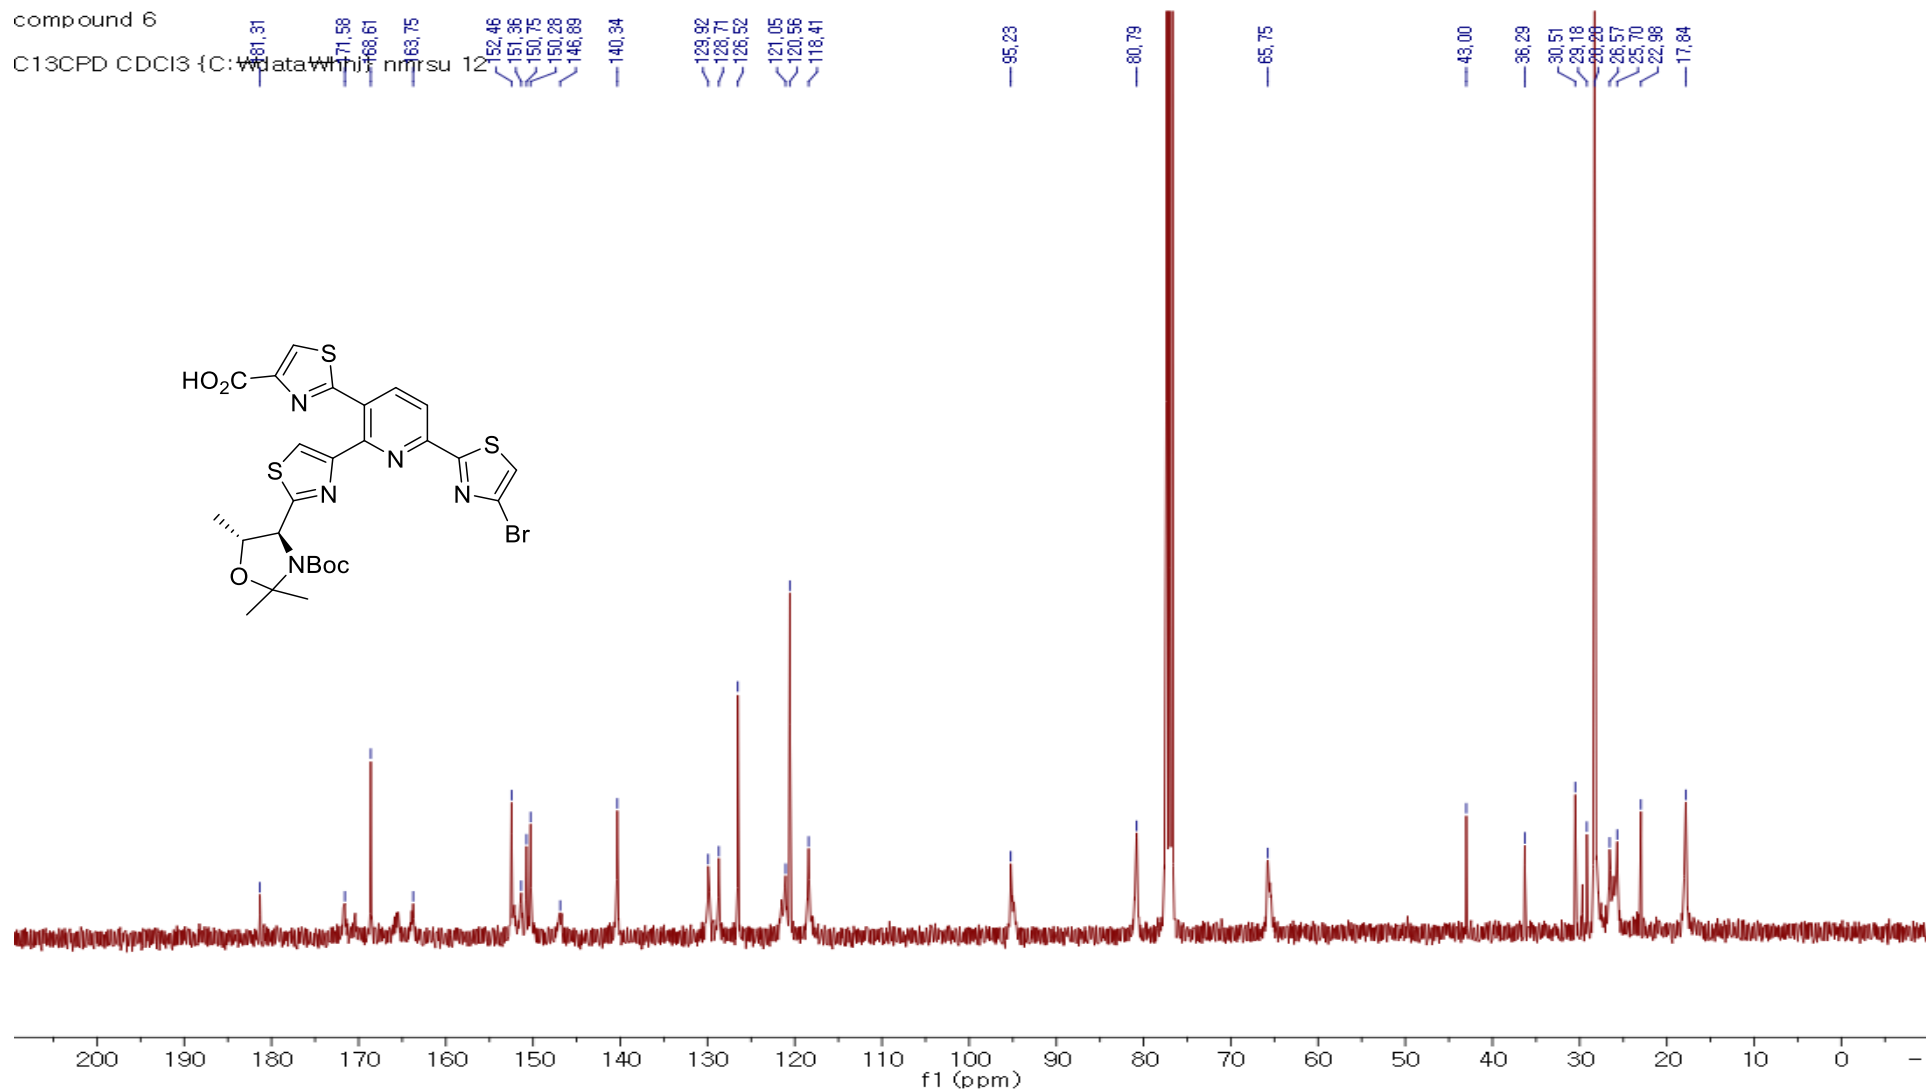

**<sup>13</sup>C-NMR Spectrum of Compound 6 (100 MHz, CDCl<sub>3</sub>)**



SYJ080620.10.fid  
 SYJ-02-045-002  
 1H NMR  
 CDCl3

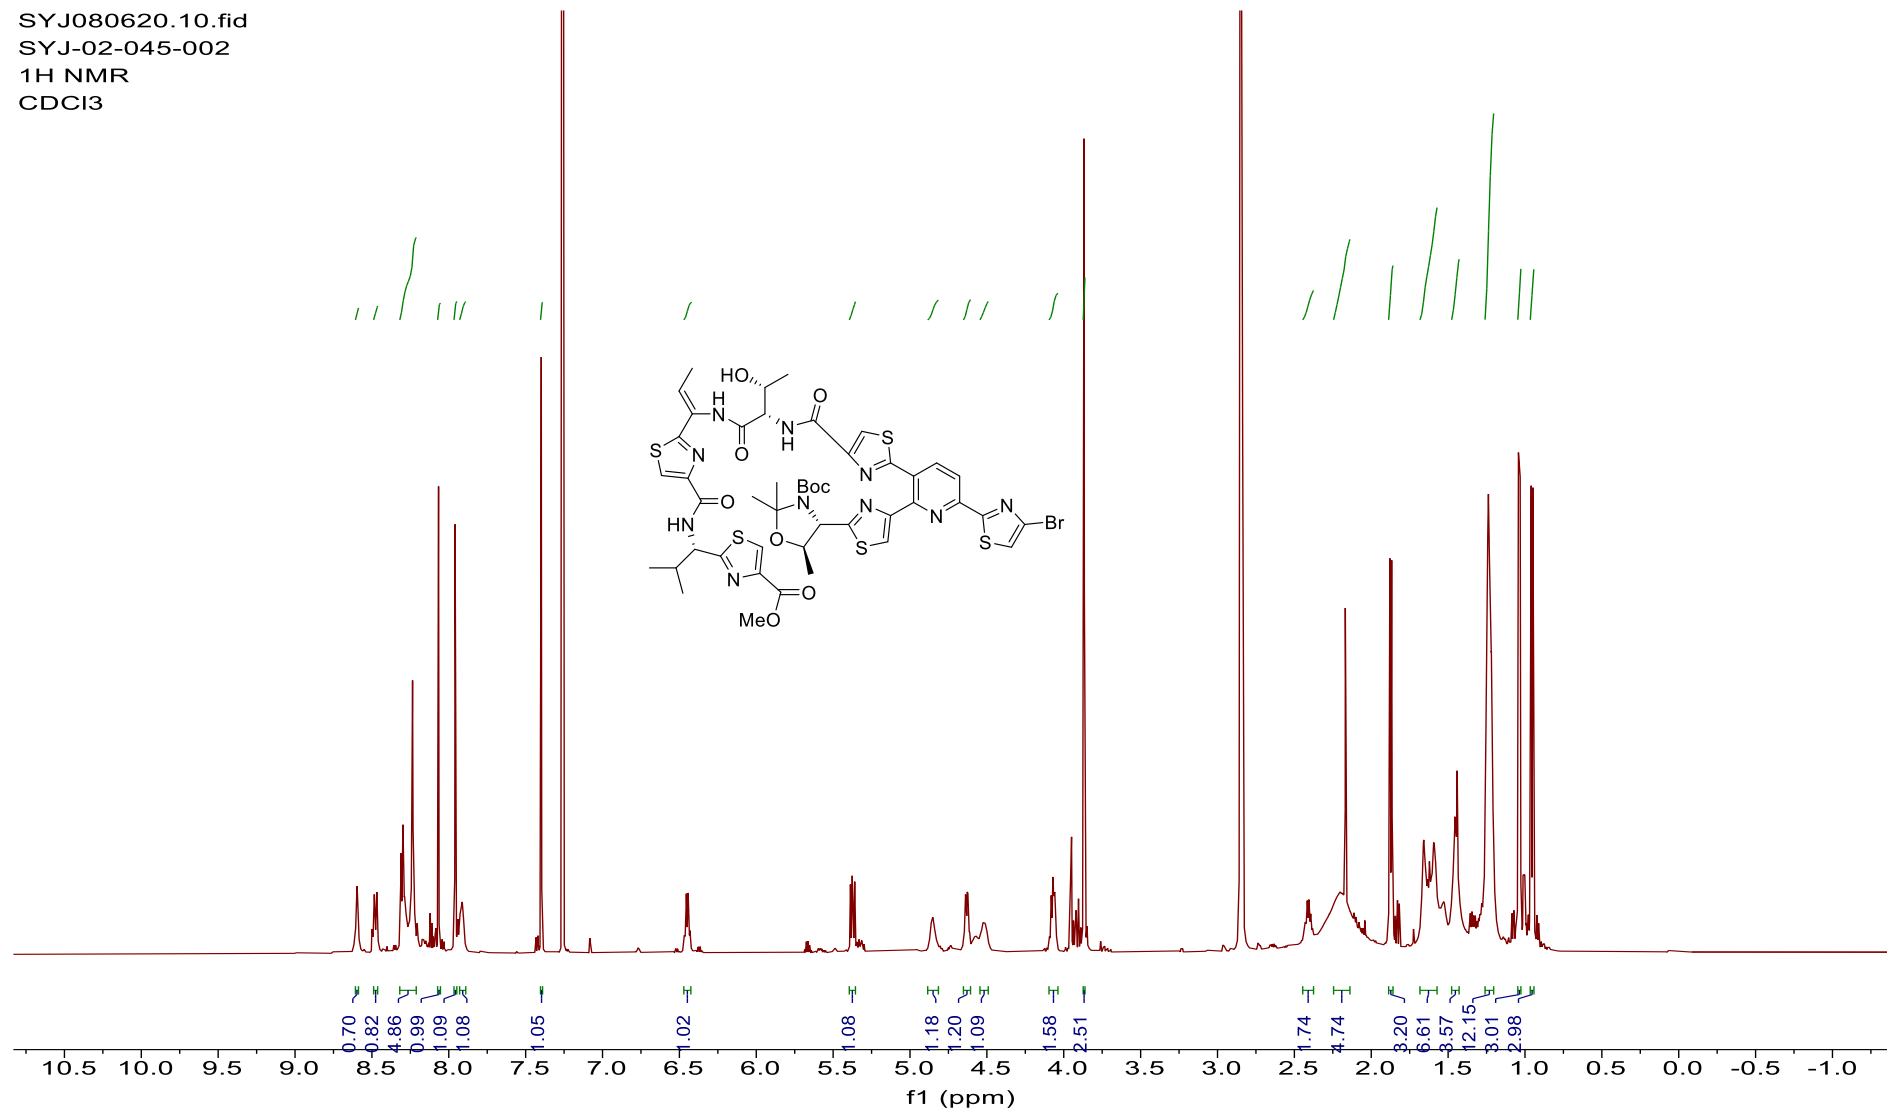

<sup>1</sup>H-NMR Spectrum of Compound 20 (600 MHz, CDCl<sub>3</sub>)

200706

C13CPD CDCI3 {C:\wdata\WLI

171.01  
168.00  
168.57  
166.24  
165.72  
161.57  
161.22  
160.49  
160.37  
152.51  
150.95  
150.22  
149.44  
148.87  
146.73  
139.95  
128.92  
128.99  
127.16  
127.01  
126.54  
125.81  
123.22  
120.62  
118.45

95.15  
80.72  
67.40  
65.63  
58.13  
56.03  
52.45  
38.59  
34.10  
28.24  
26.38  
25.69  
19.32  
18.69  
18.39  
17.87  
14.71

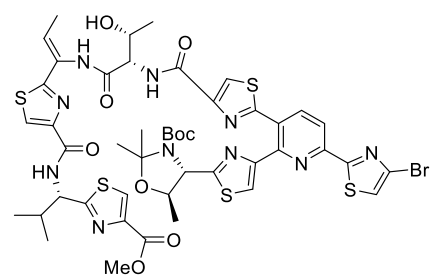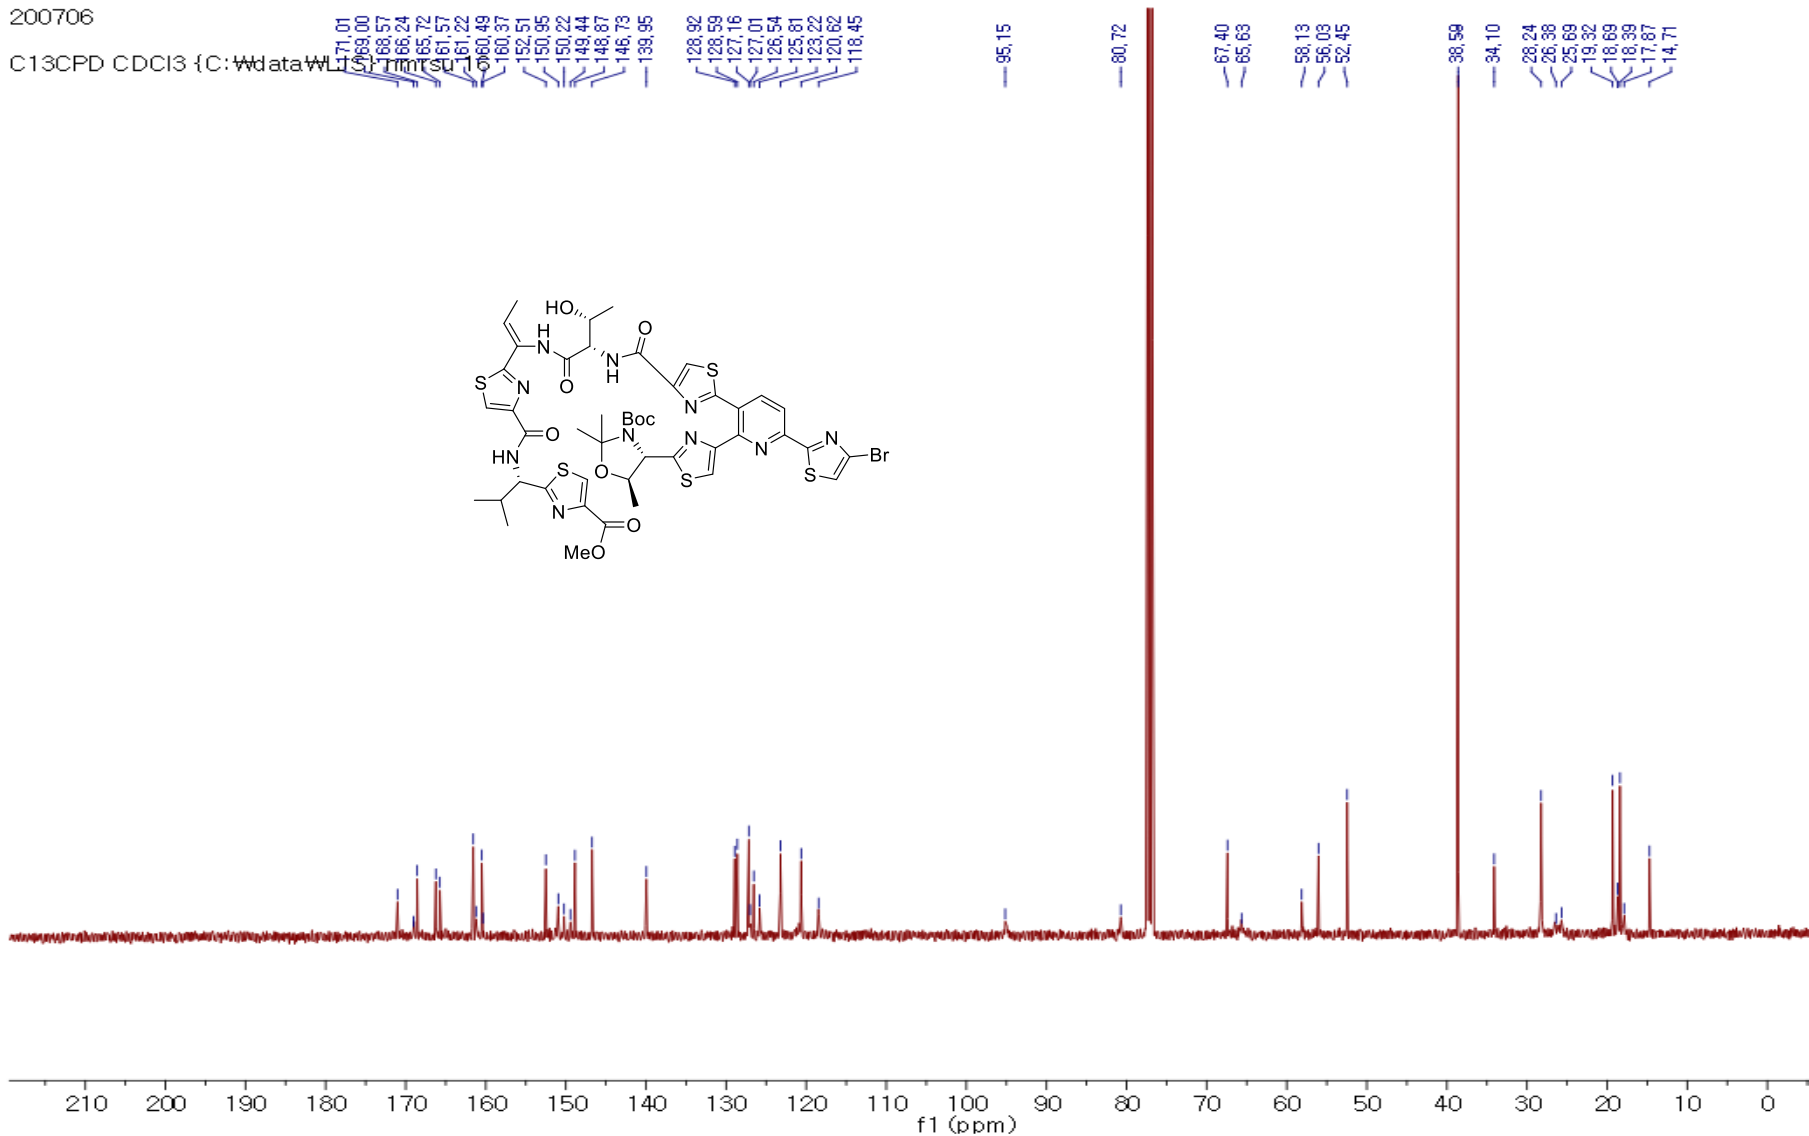

<sup>13</sup>C-NMR Spectrum of Compound 20 (100 MHz, CDCl<sub>3</sub>)

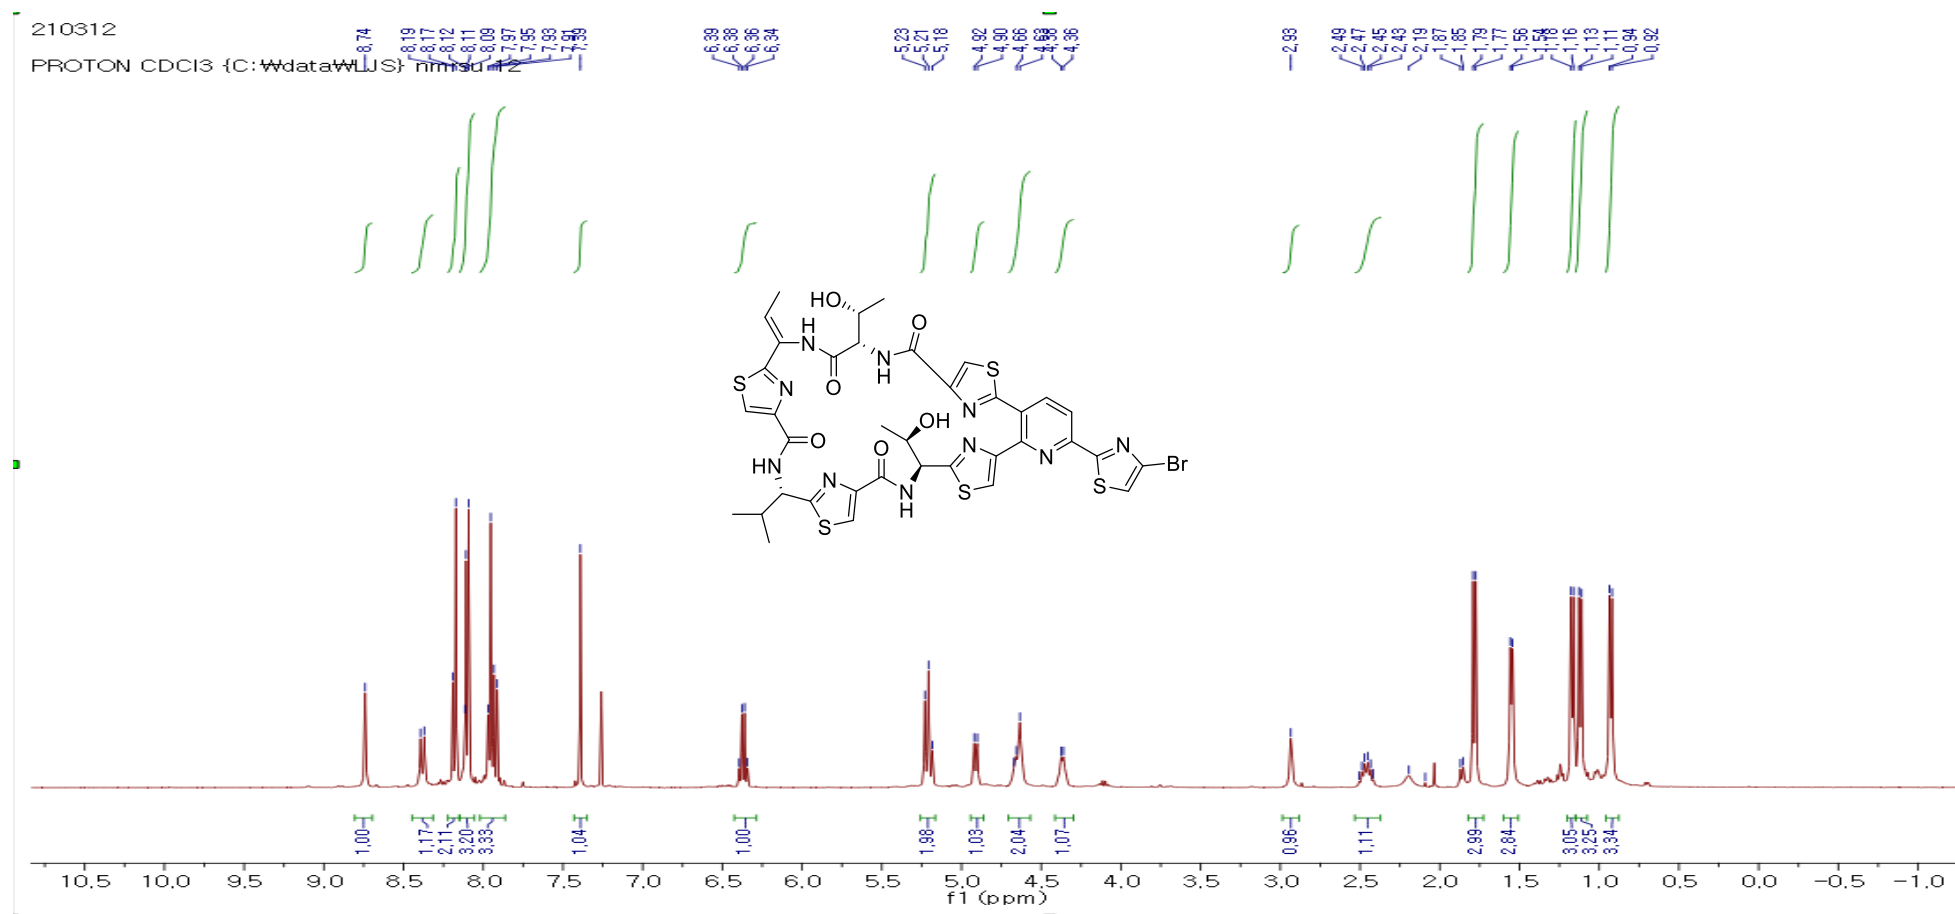

**<sup>1</sup>H-NMR Spectrum of Compound 3 (400 MHz, CDCl<sub>3</sub>)**

SYJ080620.2.fid  
 SYJ-02-045-003  
 13c NMR  
 CDCl3

170.60 169.99 168.75 168.45 166.54 166.34 161.35 161.02 160.52 153.04 150.59 150.43 150.16 149.54 149.01 141.21 129.01 128.42 127.86 126.81 125.06 124.01 123.86 122.65 120.91 118.30 77.16 CDCl3 69.01 67.79 58.48 55.81 54.75 33.94 20.07 19.90 19.22 18.88 14.63

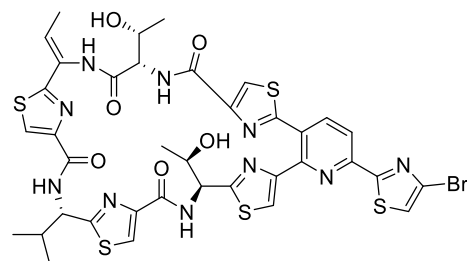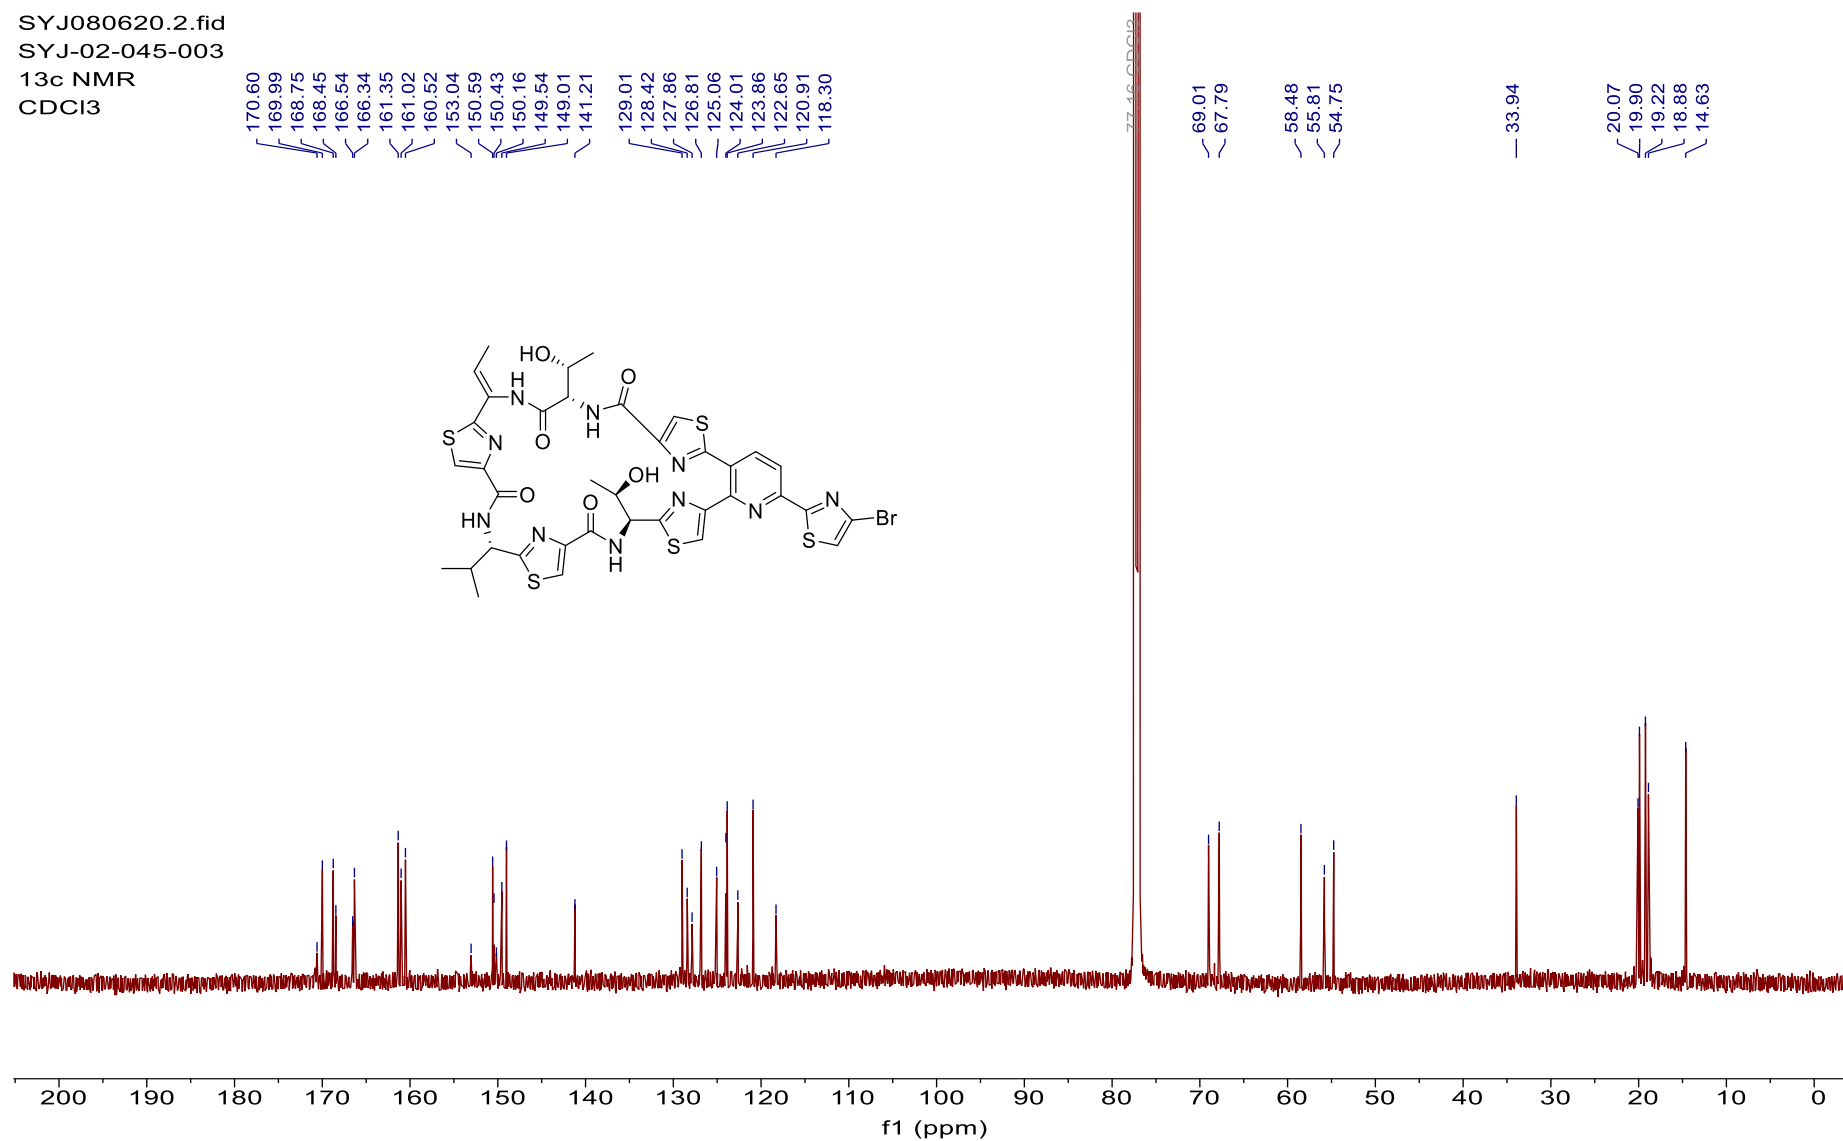

**<sup>13</sup>C-NMR Spectrum of Compound 3 (151 MHz, CDCl<sub>3</sub>)**

SYJ122920.1.fid  
E1  
1H NMR  
CDCl<sub>3</sub>

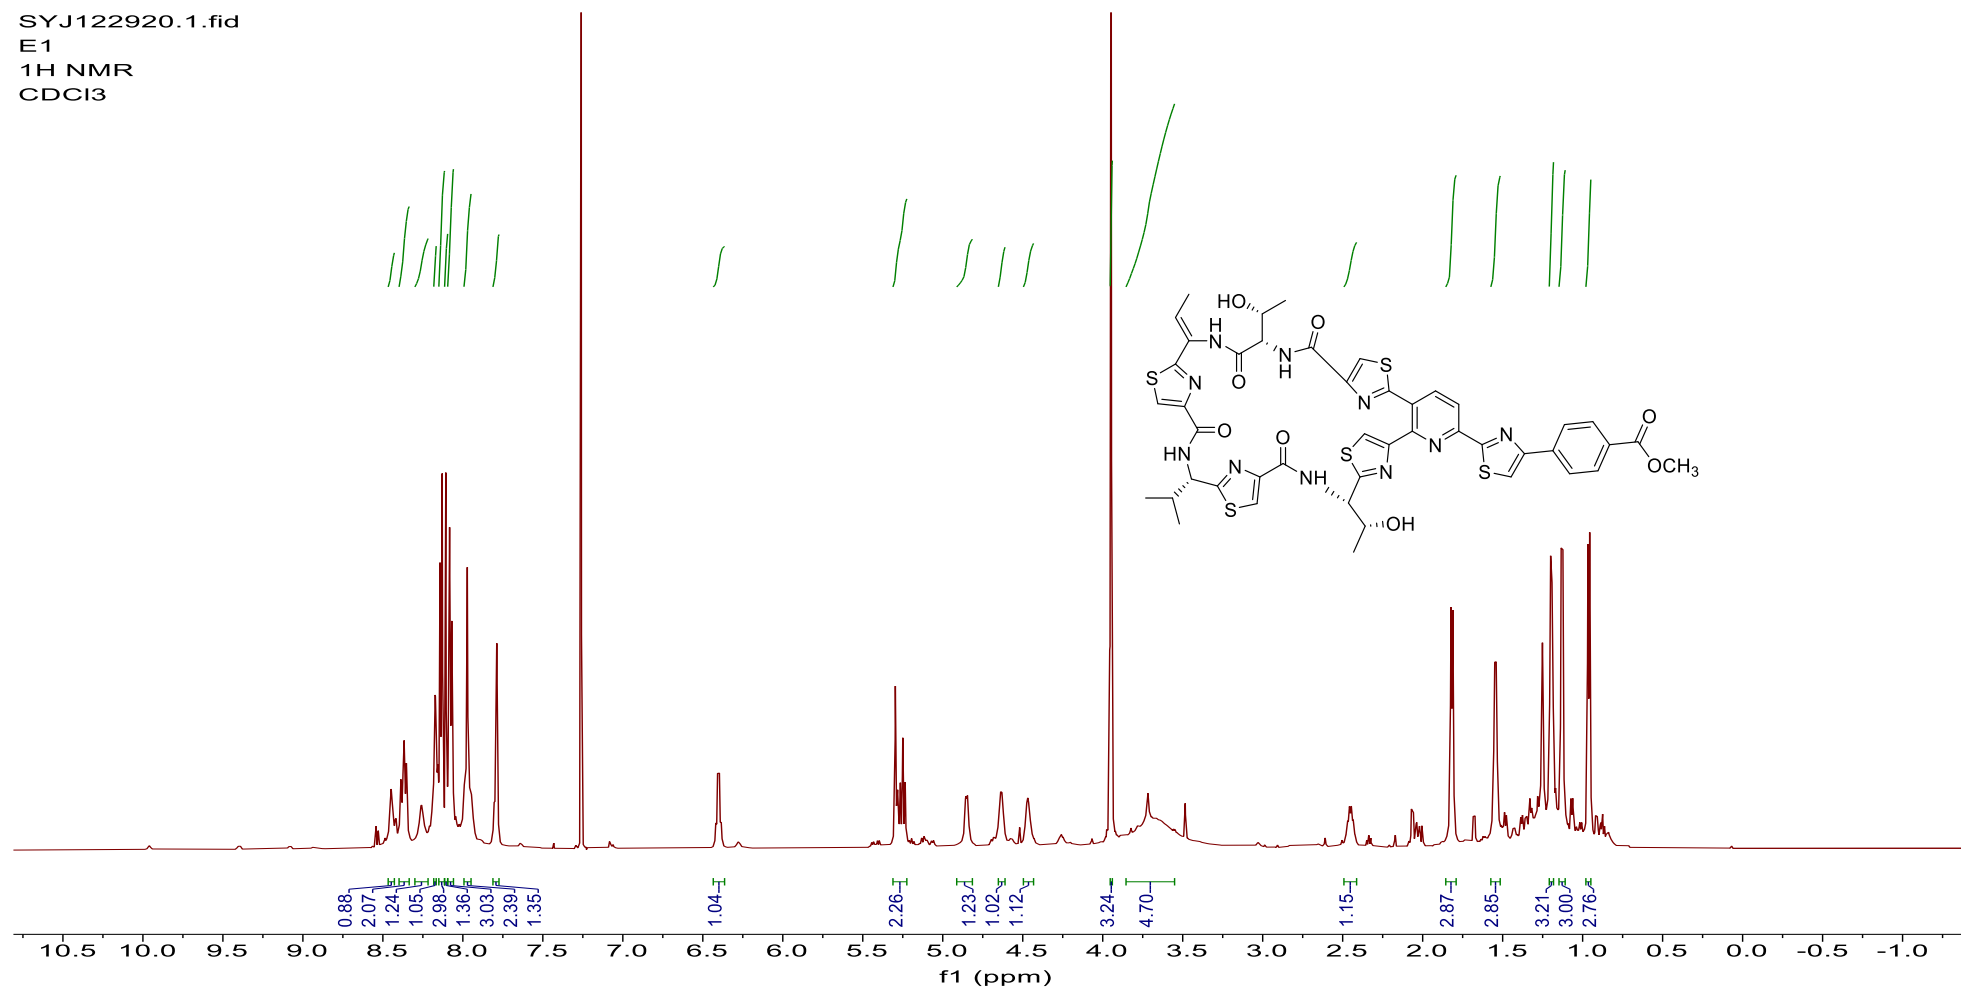

<sup>1</sup>H-NMR Spectrum of Compound 22a (600 MHz, CDCl<sub>3</sub>)

SYJ122920.2.fid  
E1  
13C NMR  
CDCl3

169.96  
168.79  
167.95  
166.99  
166.69  
166.39  
161.41  
161.12  
160.62  
156.06  
151.73  
150.21  
149.44  
148.93  
140.92  
138.38  
130.38  
130.36  
129.88  
128.99  
128.58  
127.56  
126.35  
125.29  
124.18  
123.97  
122.52  
118.71  
118.46

77.37  
77.16 CDCl3  
77.16  
76.95  
69.01  
67.77  
58.47  
55.83  
54.88  
52.35  
33.91  
29.83  
22.83  
20.03  
19.89  
19.23  
18.99  
14.61

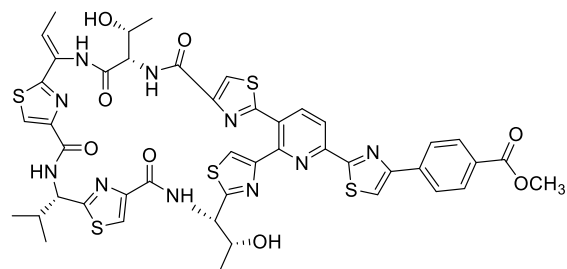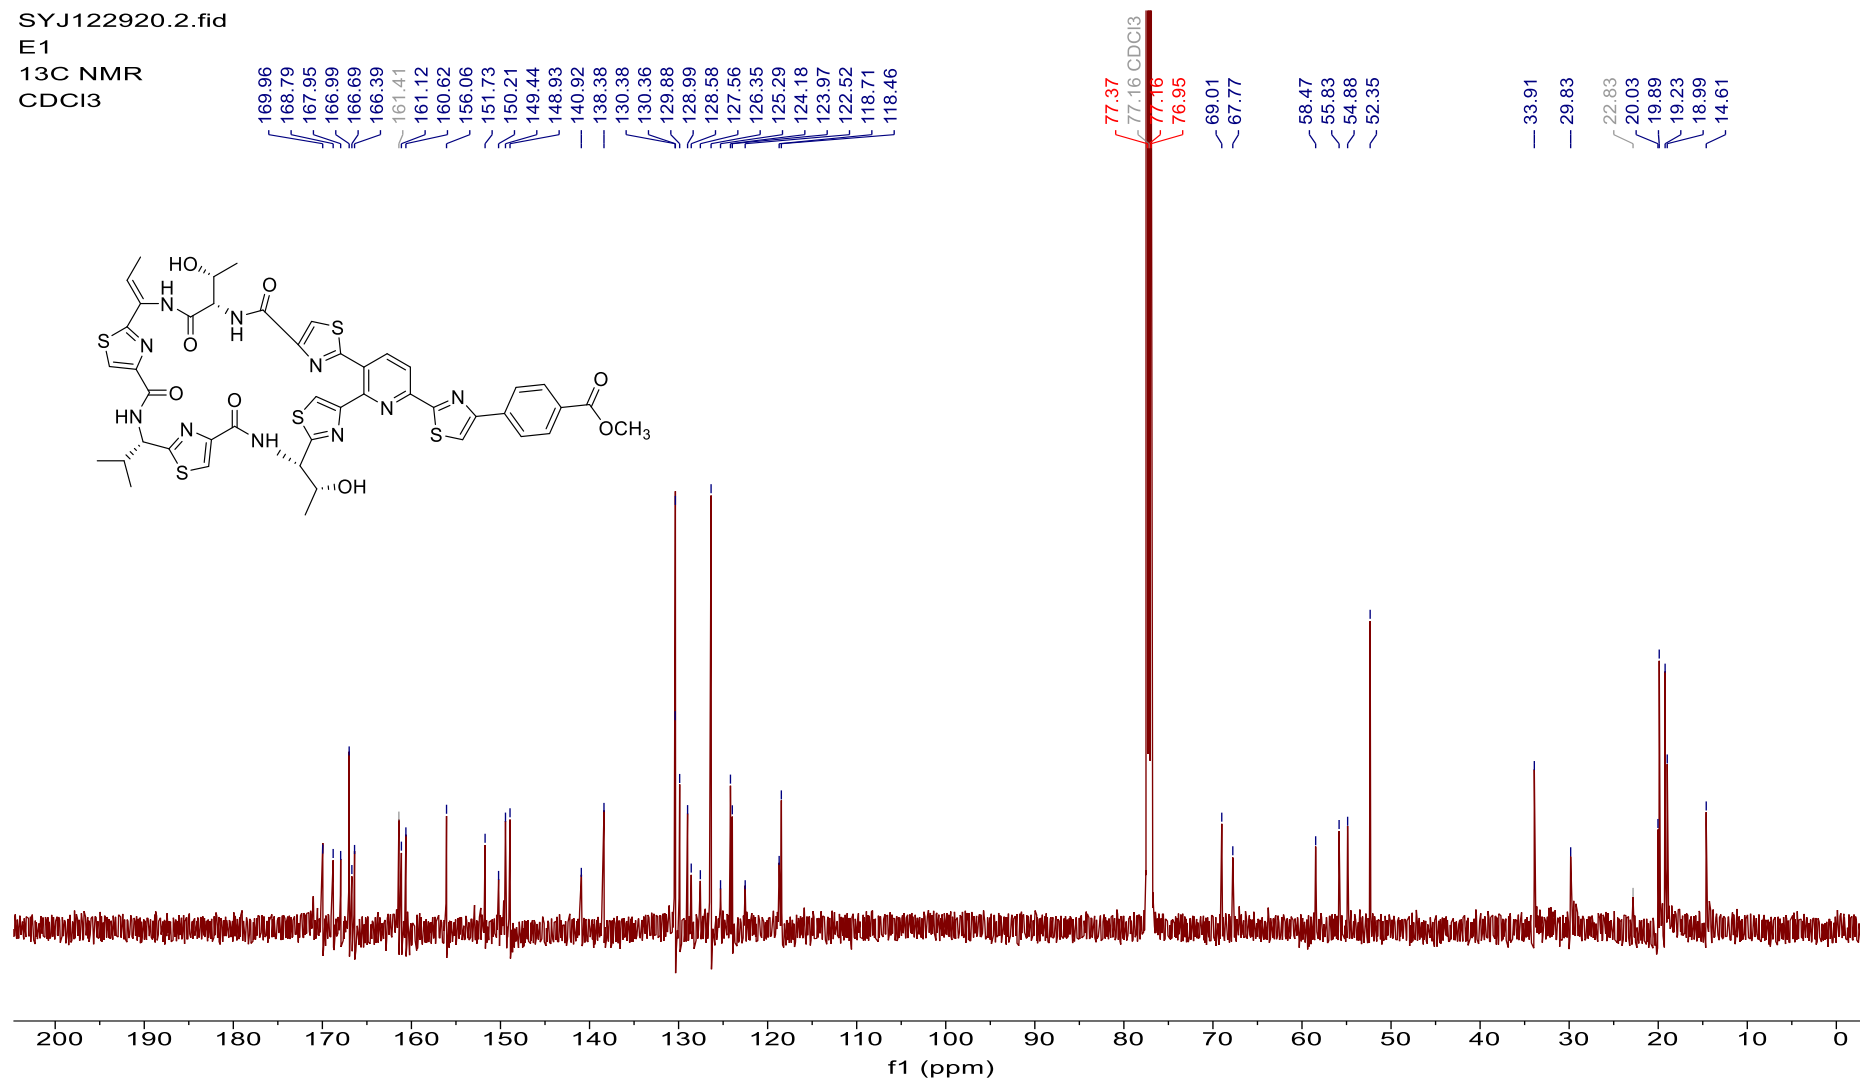

<sup>13</sup>C-NMR Spectrum of Compound 22a (151 MHz, CDCl<sub>3</sub>)

SYJ021721.1.fid  
E2  
1H NMR  
DMSO

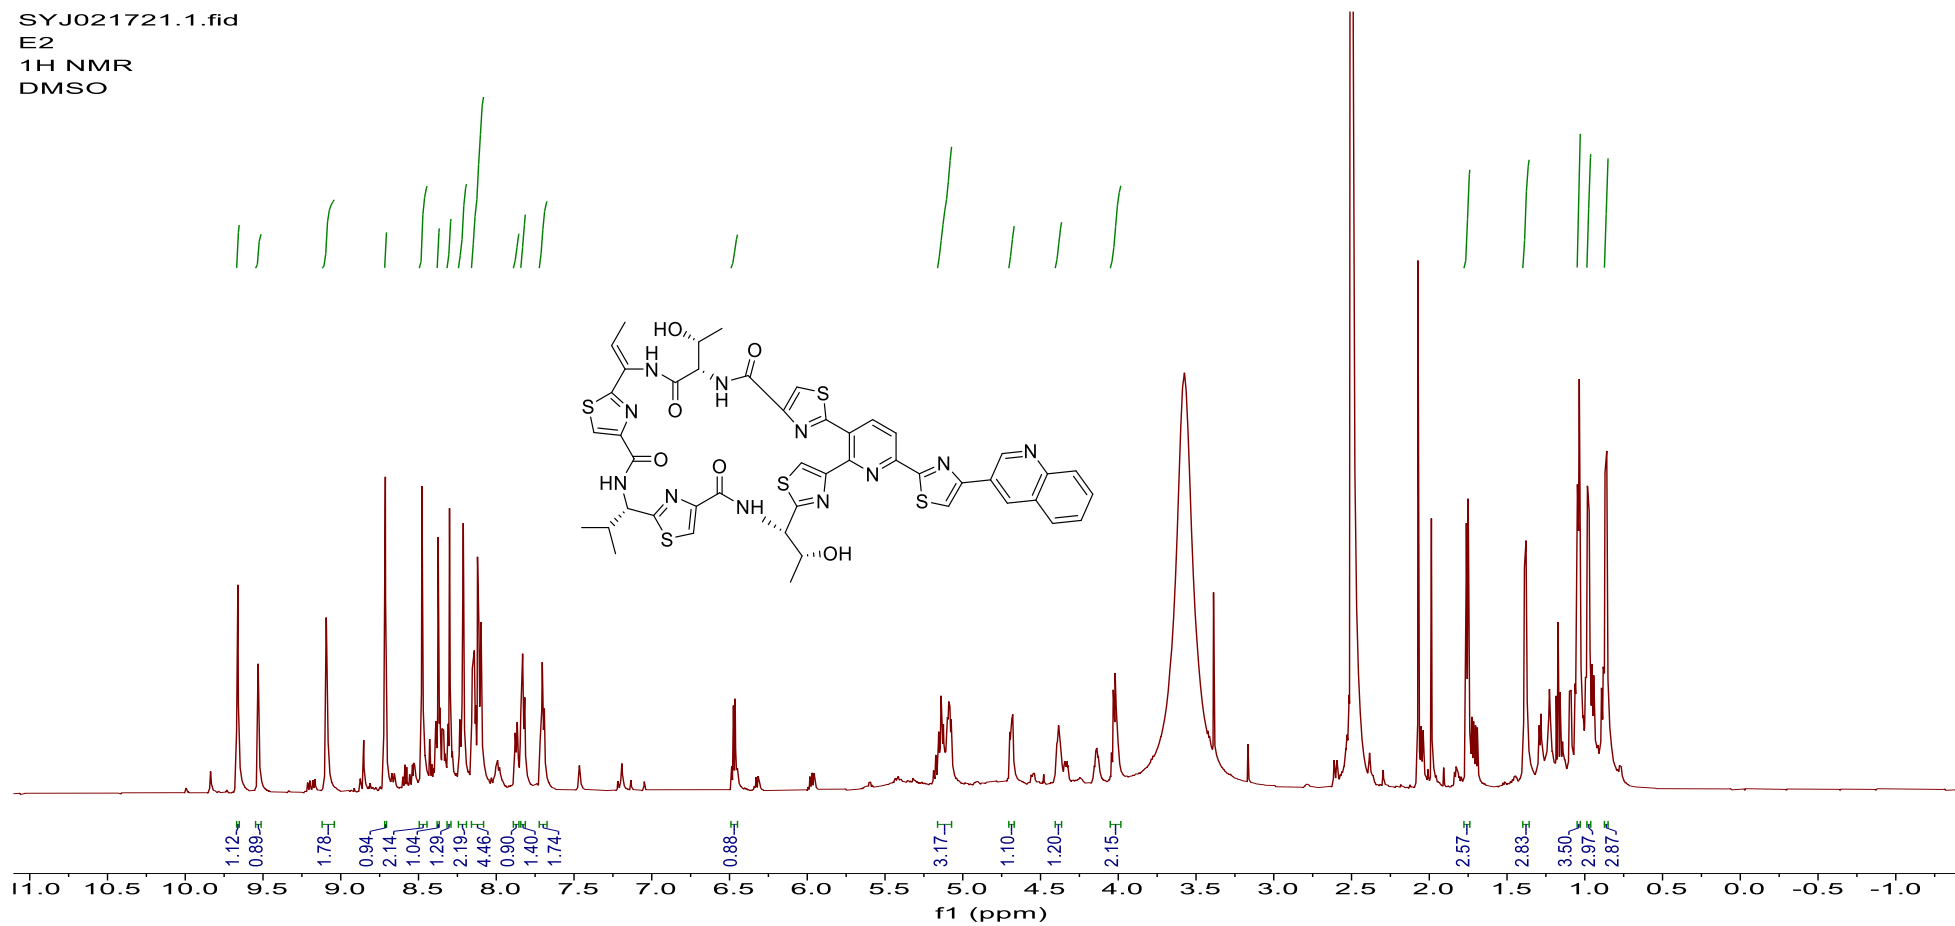

**<sup>1</sup>H-NMR Spectrum of Compound 22b (600 MHz, DMSO-d<sub>6</sub>)**

SYJ021821.10.fid

E2

<sup>13</sup>C NMR

DMSO

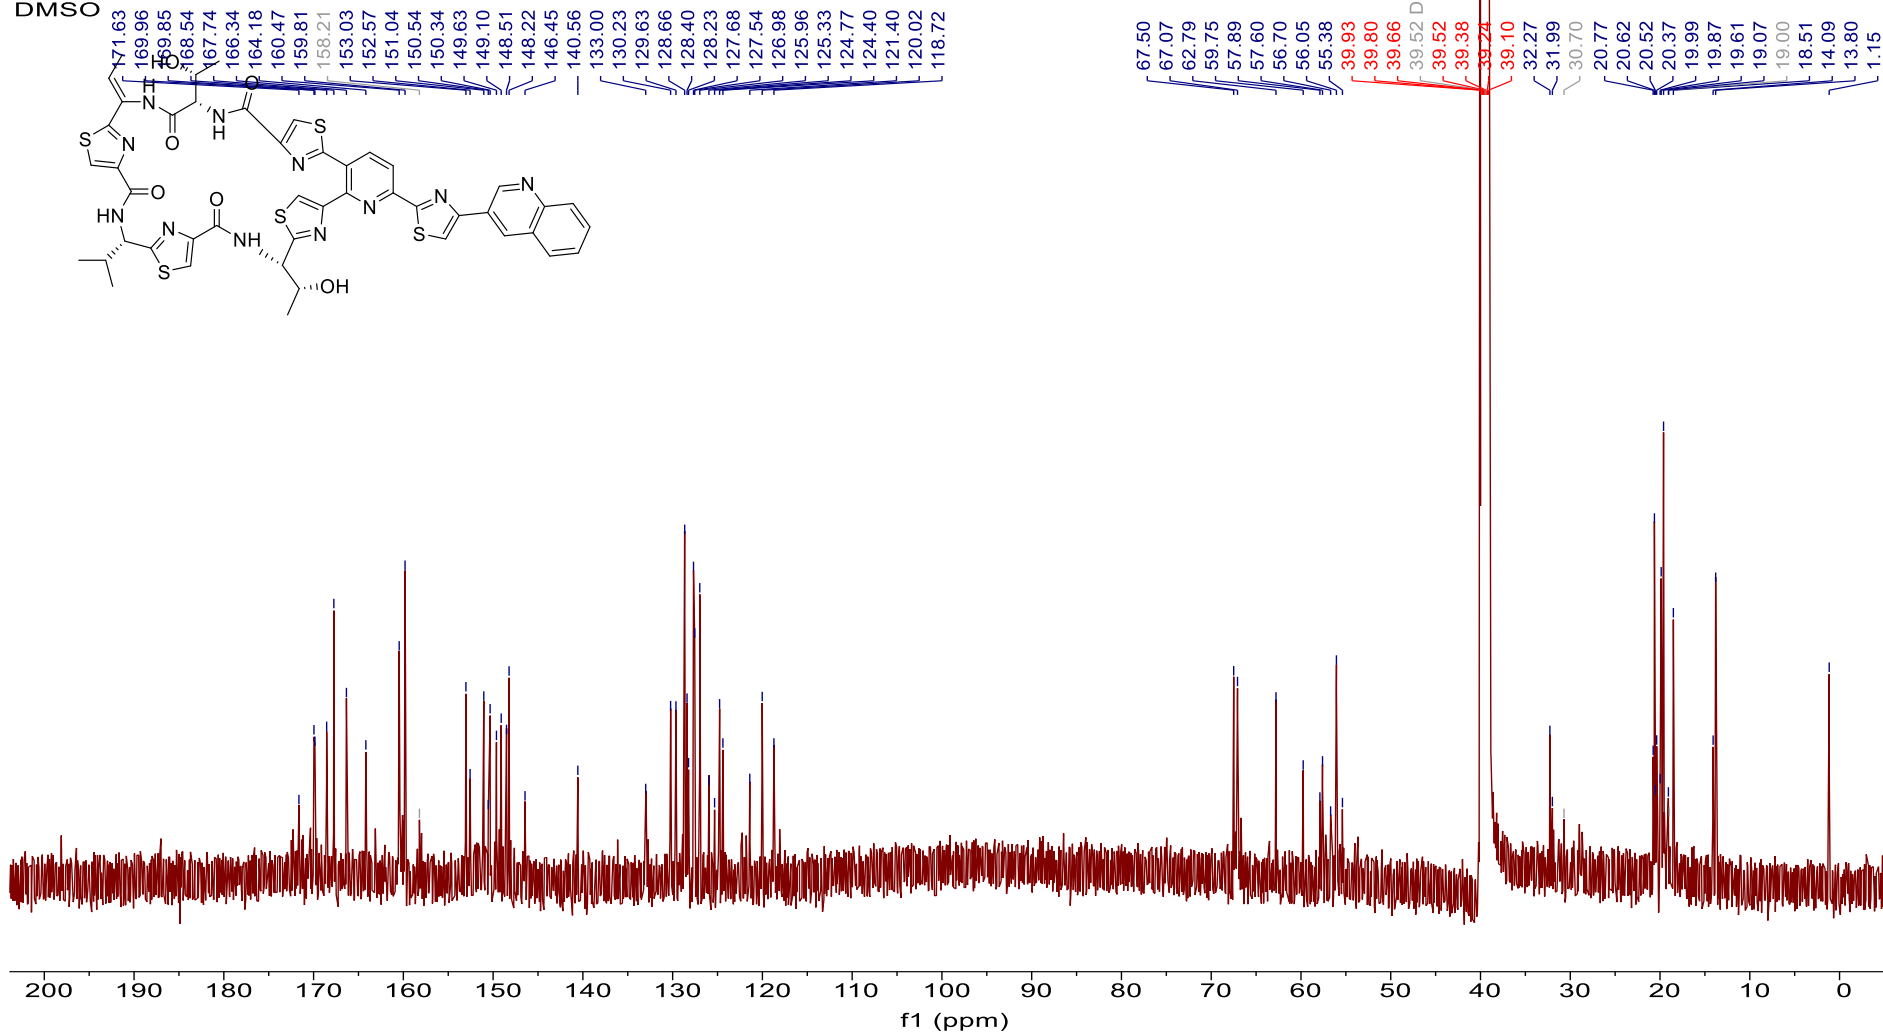

<sup>13</sup>C-NMR Spectrum of Compound 22b (151 MHz, DMSO-*d*<sub>6</sub>)



SYJ122920.20.fid  
E3  
1H NMR  
CDCl3

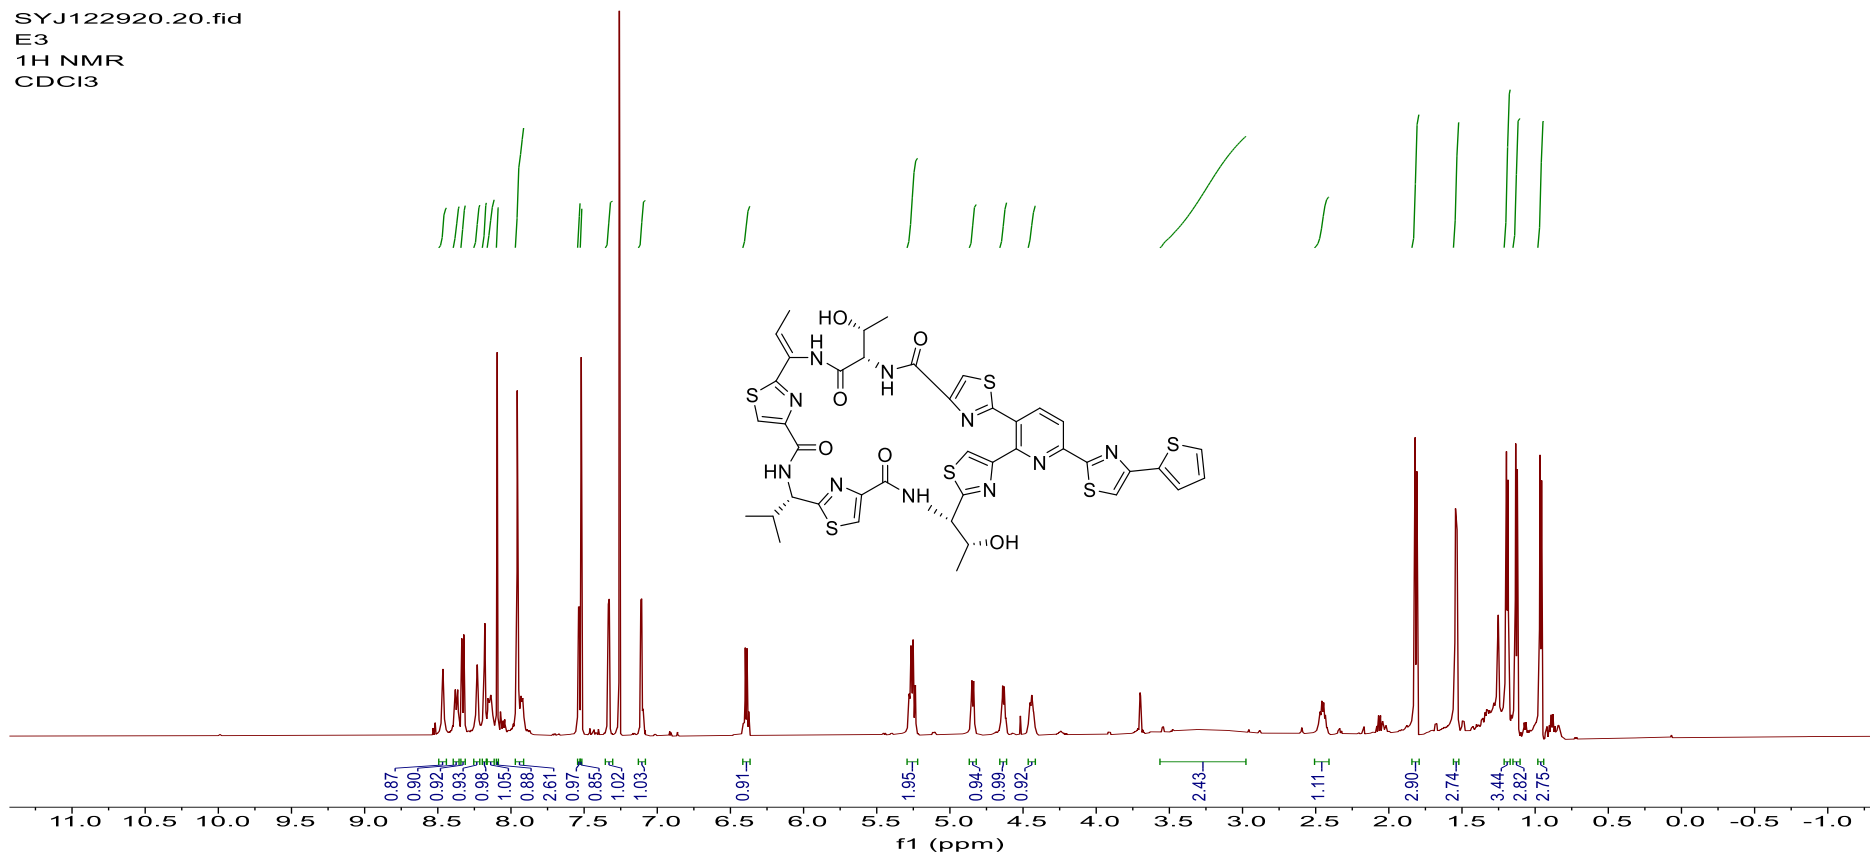

**<sup>1</sup>H-NMR Spectrum of Compound 22c (600 MHz, CDCl<sub>3</sub>)**

SYJ122920.21.fid

E3

<sup>13</sup>C NMR

CDCl<sub>3</sub>

170.75  
169.96  
168.82  
167.59  
166.74  
166.34  
161.35  
161.03  
160.55  
153.09  
151.77  
151.63  
150.33  
149.76  
149.54  
149.03  
140.91  
138.16  
129.07  
128.32  
127.97  
127.42  
125.77  
125.03  
124.63  
124.02  
123.81  
122.51  
118.64  
115.32

77.37  
77.16 CDCl<sub>3</sub>  
77.16  
76.95  
69.02  
67.76  
63.82  
58.45  
55.79  
54.81  
33.91  
29.83  
20.08  
19.90  
19.24  
18.92  
14.62  
14.26

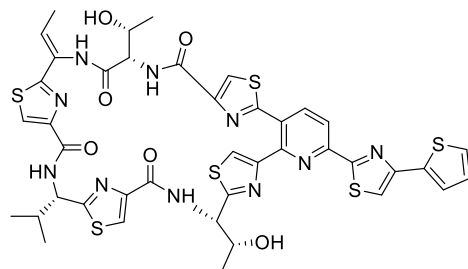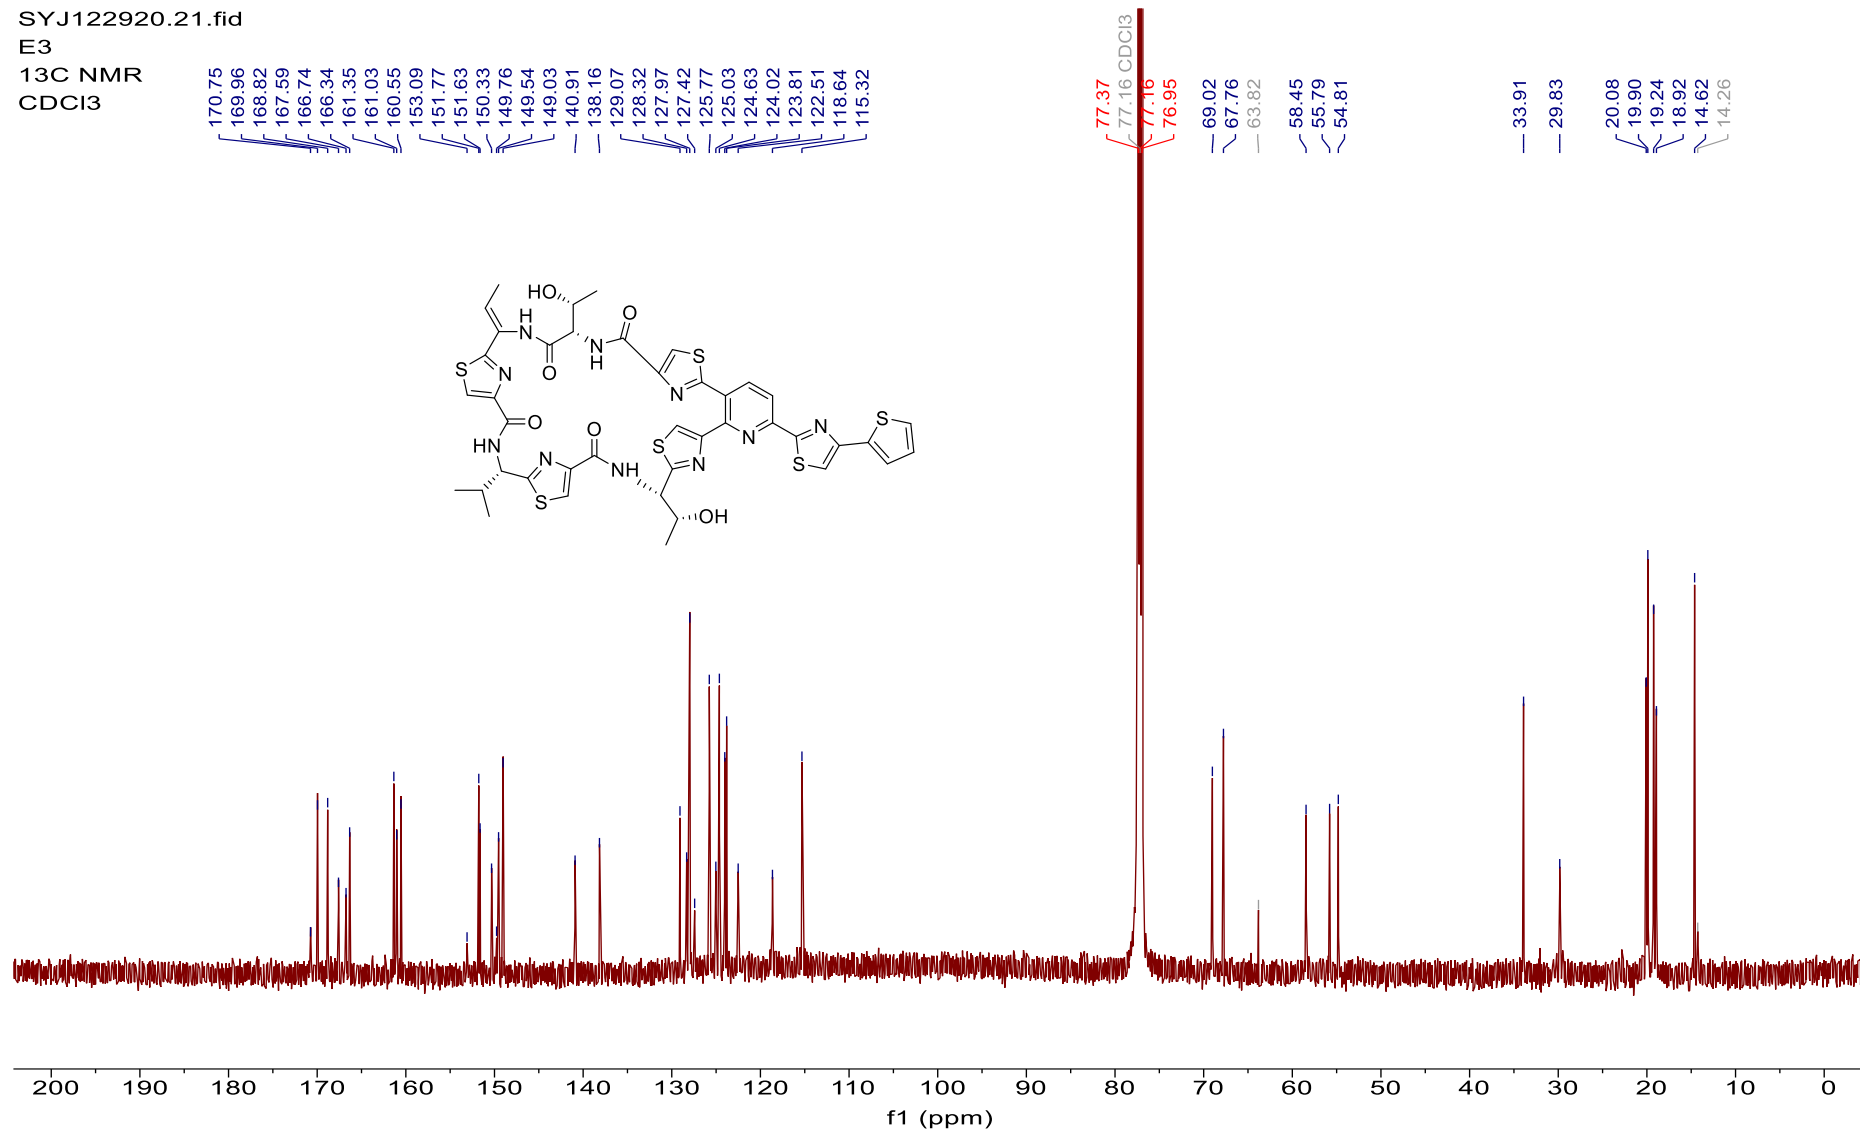

<sup>13</sup>C-NMR Spectrum of Compound 22c (151 MHz, CDCl<sub>3</sub>)

SYJ122920.30.fid  
E4  
1H NMR  
CDCl3

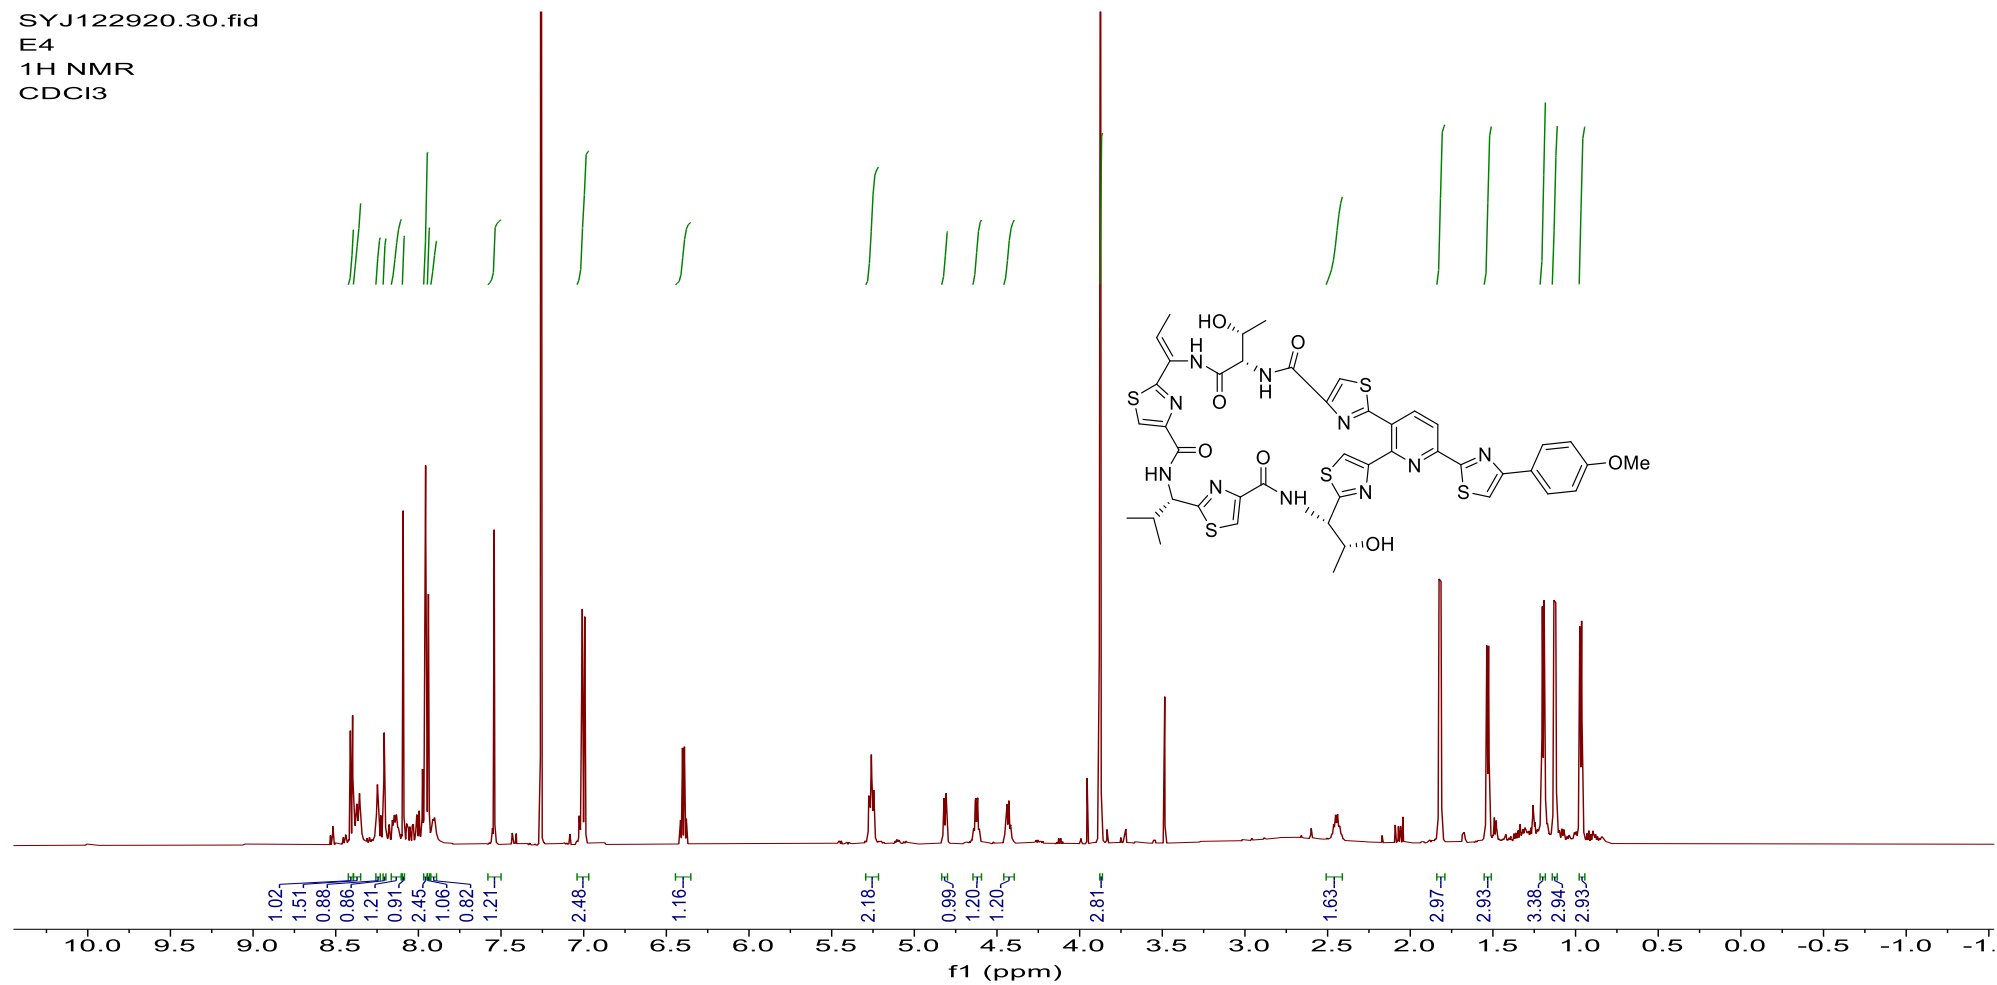

<sup>1</sup>H-NMR Spectrum of Compound 22d (600 MHz, CDCl<sub>3</sub>)

SYJ122920.32.fid

E4

<sup>13</sup>C NMR

CDCl<sub>3</sub>

169.97  
168.84  
167.47  
166.91  
166.35  
161.35  
161.09  
160.54  
160.08  
157.05  
151.92  
150.37  
149.55  
149.03  
— 140.99  
129.84  
129.04  
128.31  
127.92  
127.26  
125.02  
123.99  
123.82  
122.59  
118.62  
114.98  
114.36  
114.01

77.37  
77.16  
77.16  
76.95  
69.08  
67.83  
58.54  
55.77  
55.53  
54.71

— 33.96

20.24  
19.88  
19.18  
19.08  
18.87  
14.64

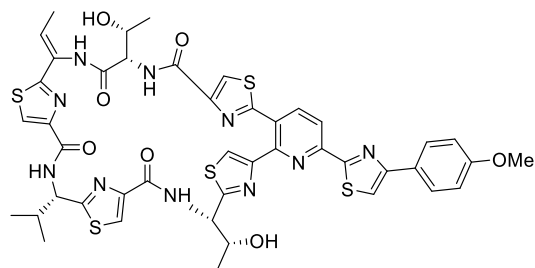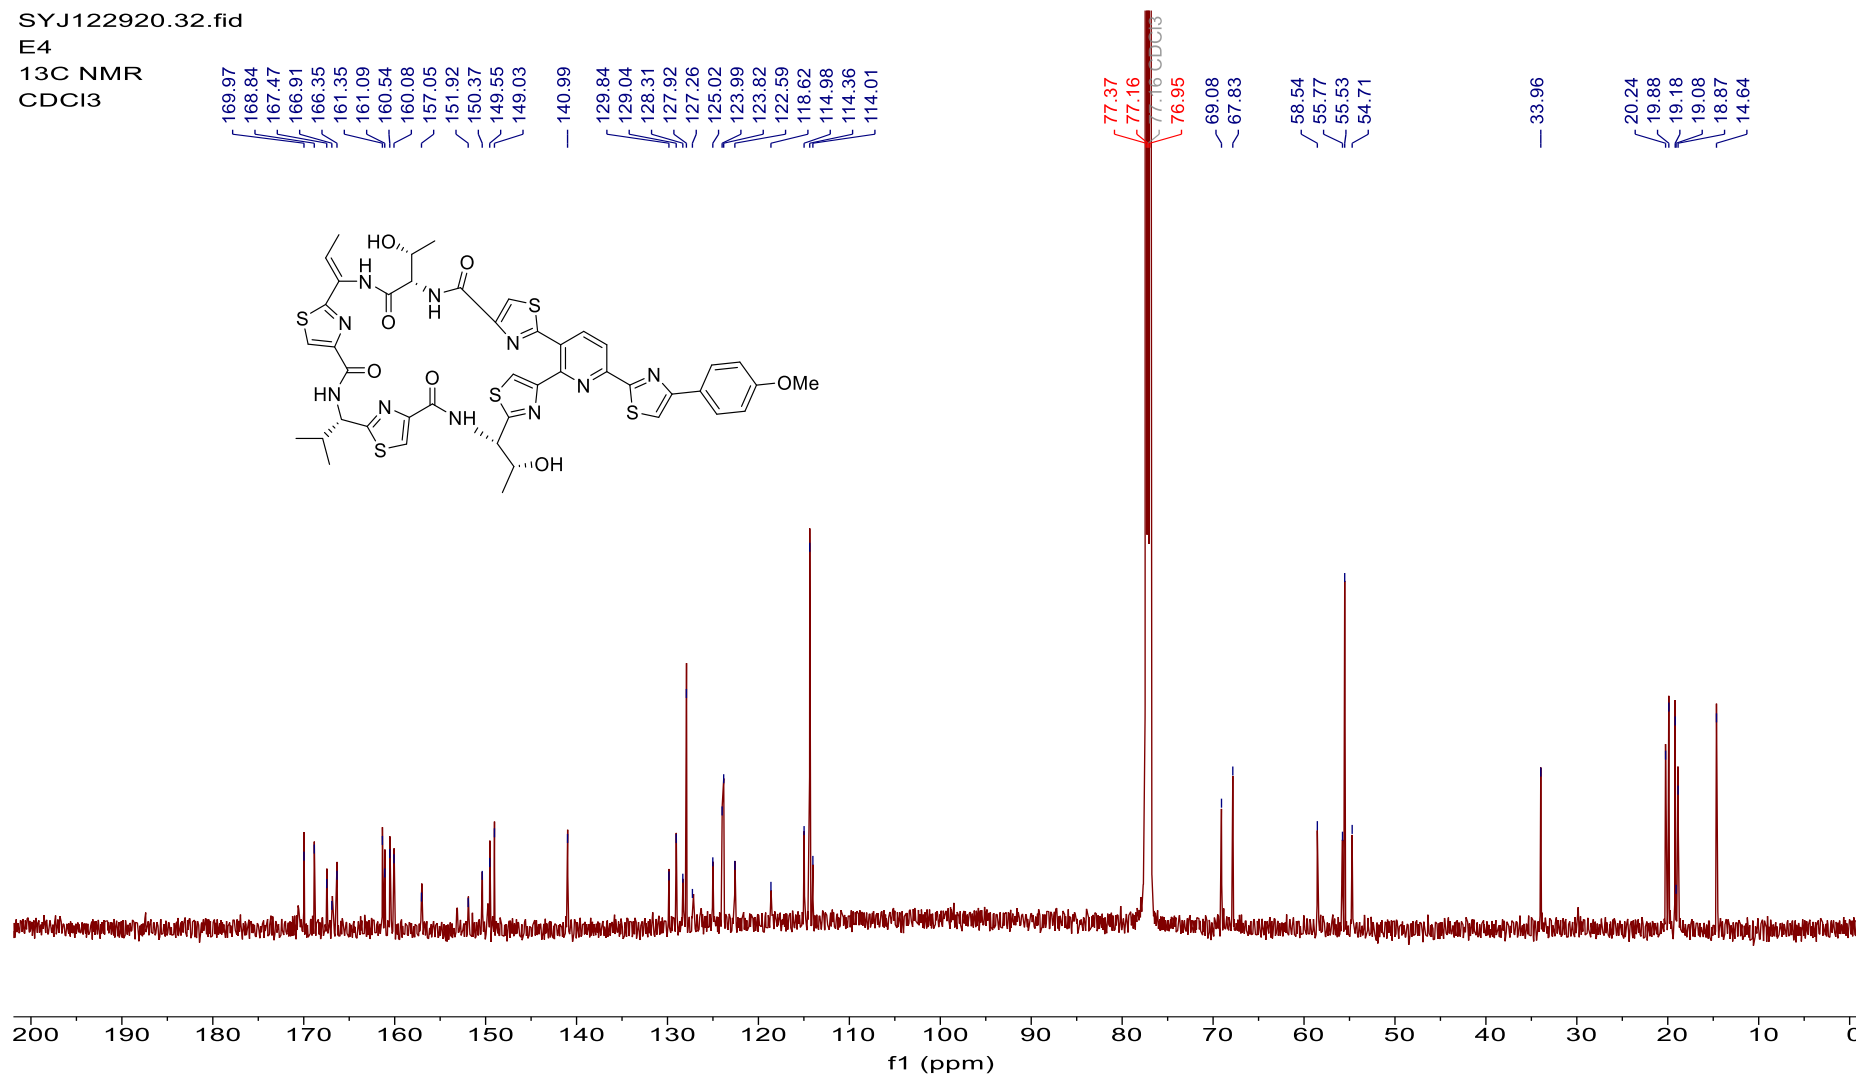

<sup>13</sup>C-NMR Spectrum of Compound 22d (151 MHz, CDCl<sub>3</sub>)

SYJ012621.20.fid  
E5  
1H NMR  
CDCl<sub>3</sub>

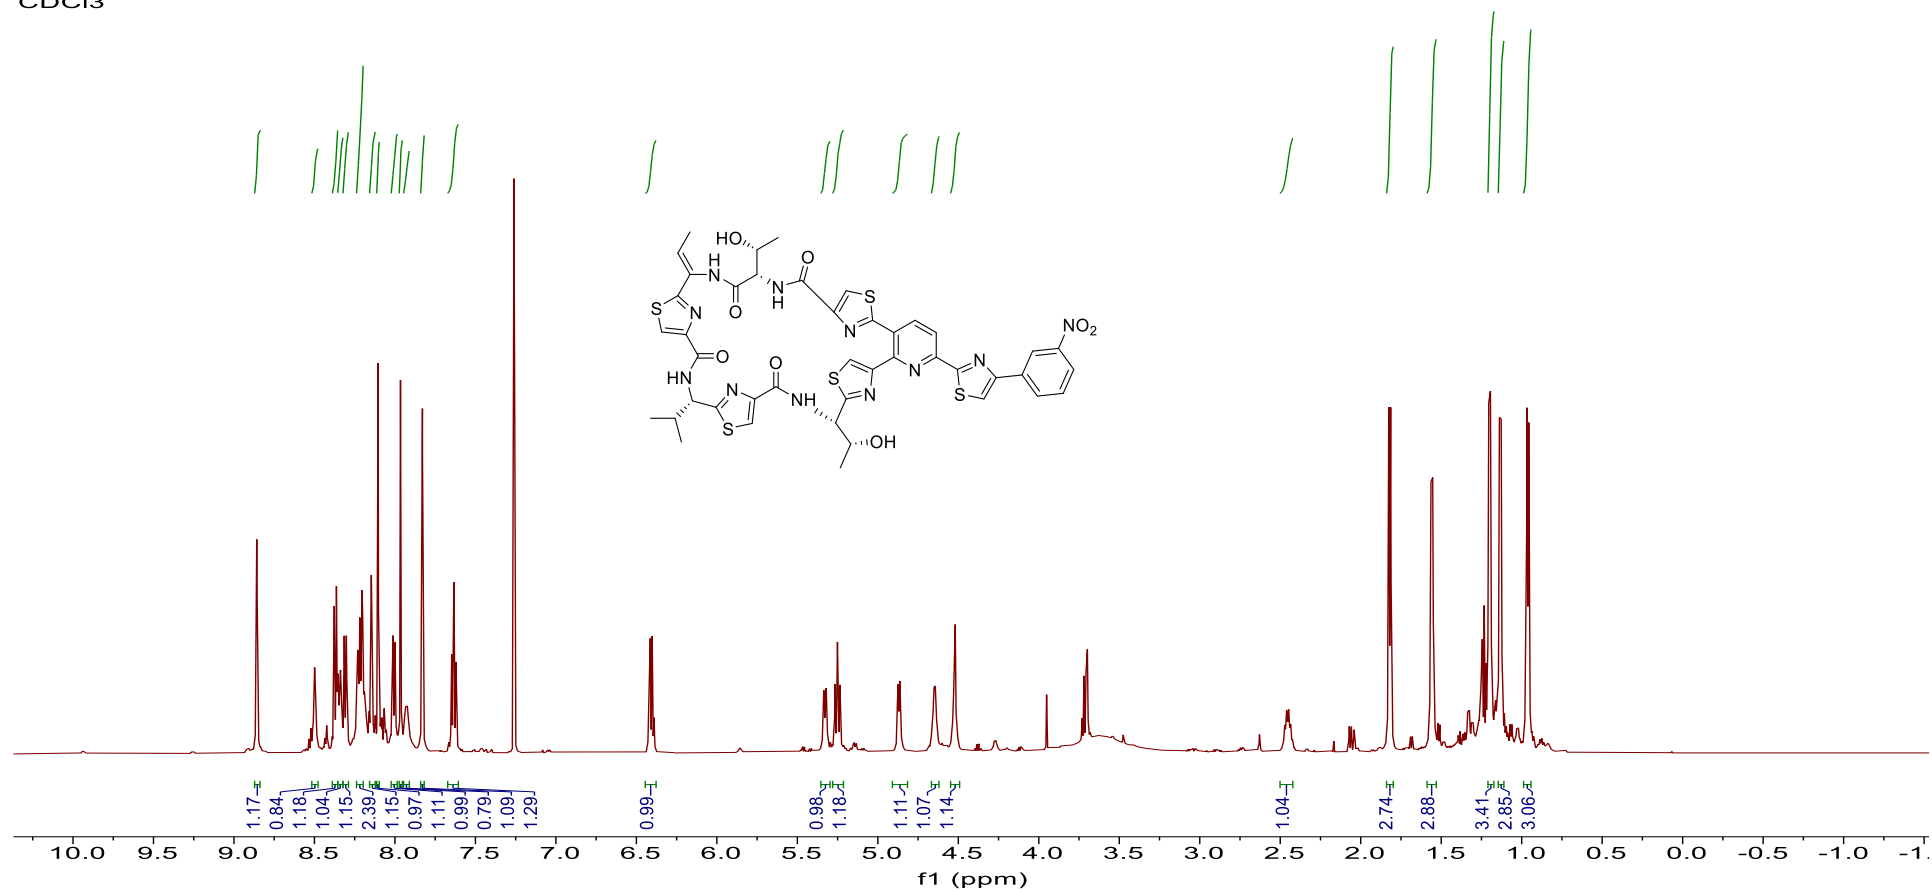

**<sup>1</sup>H-NMR Spectrum of Compound 22e (600 MHz, CDCl<sub>3</sub>)**

SYJ012621.23.fid  
E5  
13C NMR  
CDCl3

171.44  
170.00  
168.82  
168.29  
166.41  
161.36  
161.18  
160.95  
160.54  
154.58  
152.67  
151.49  
150.30  
149.46  
149.06  
148.93  
140.84  
135.95  
132.12  
130.00  
129.95  
129.04  
128.61  
127.85  
125.23  
124.15  
123.84  
123.07  
122.39  
121.42  
118.84  
118.53

77.16-CDCl3

68.99  
67.73  
63.83  
58.39  
55.80  
54.97

33.90

19.97  
19.90  
19.84  
19.26  
19.07  
14.59

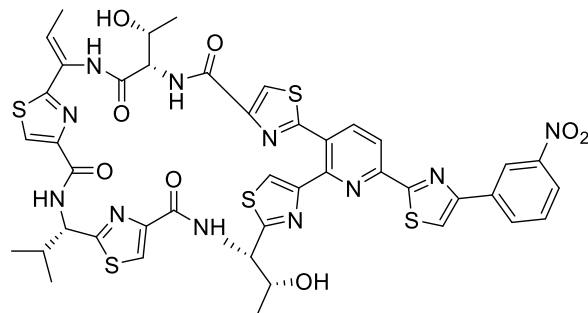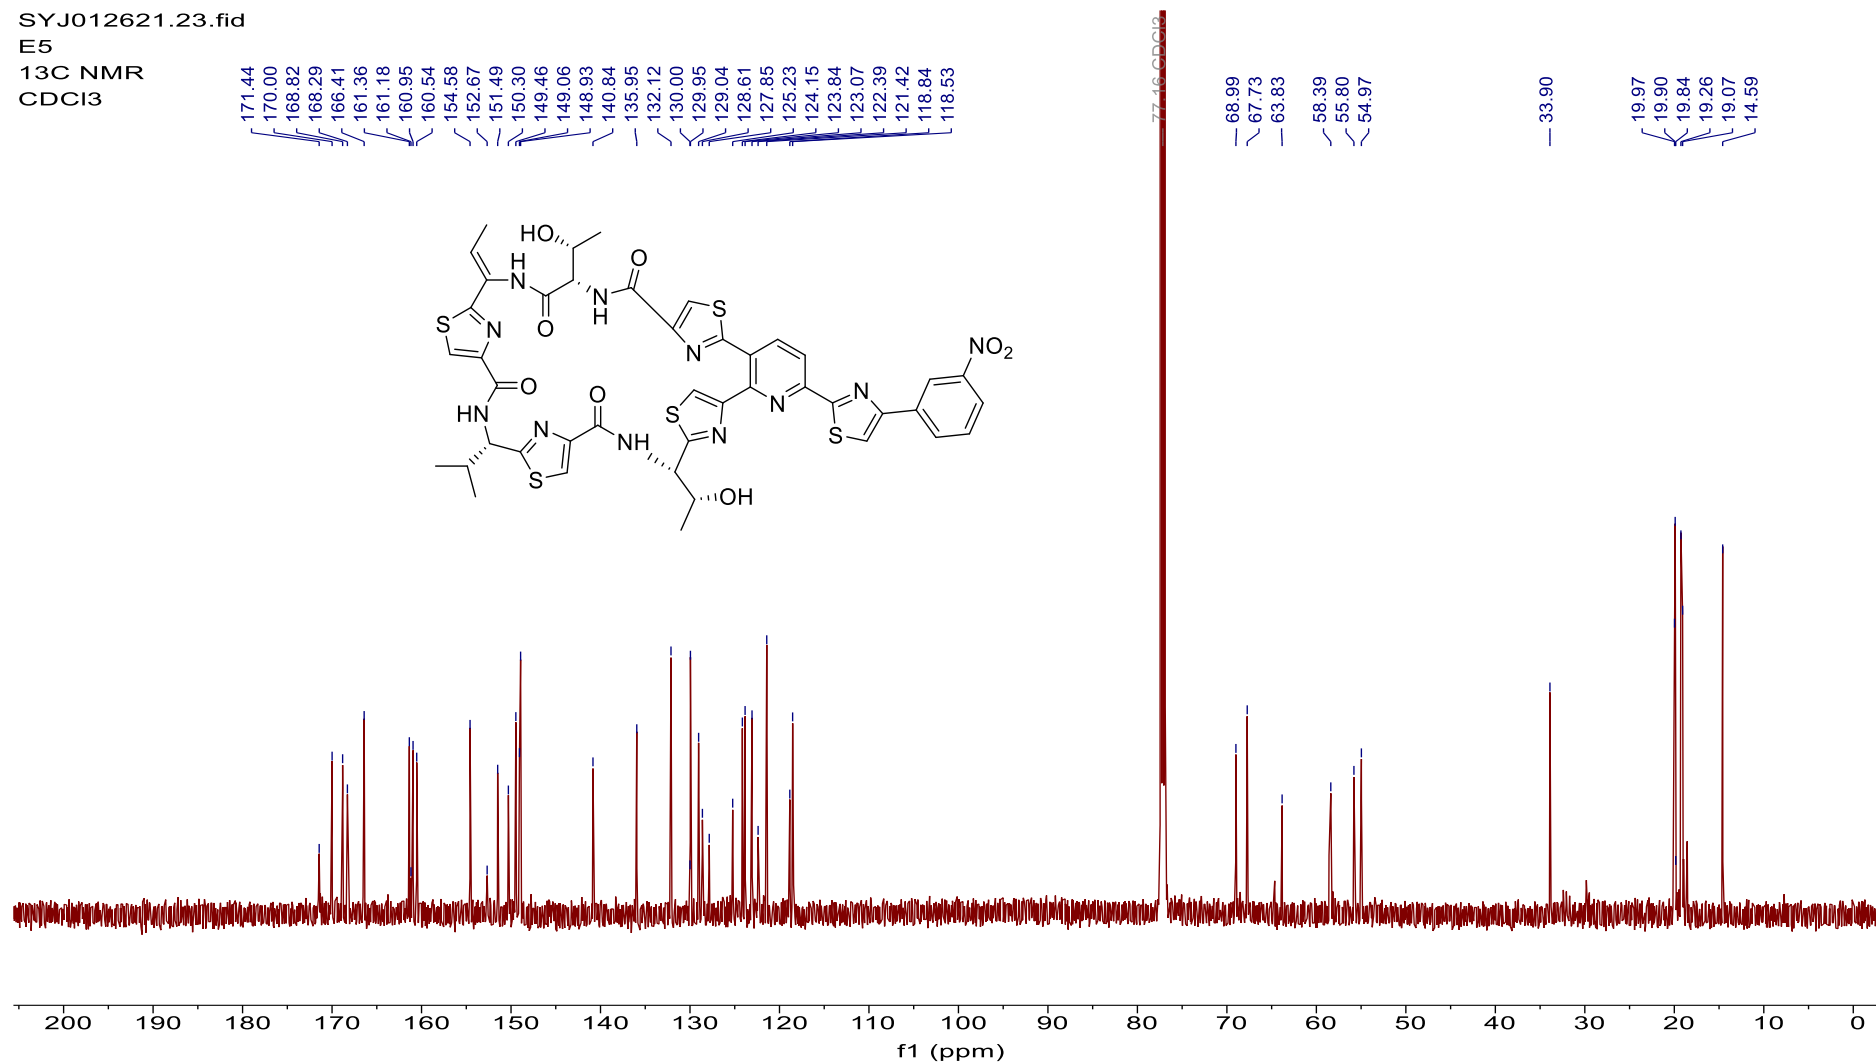

<sup>13</sup>C-NMR Spectrum of Compound 22e (151 MHz, CDCl<sub>3</sub>)

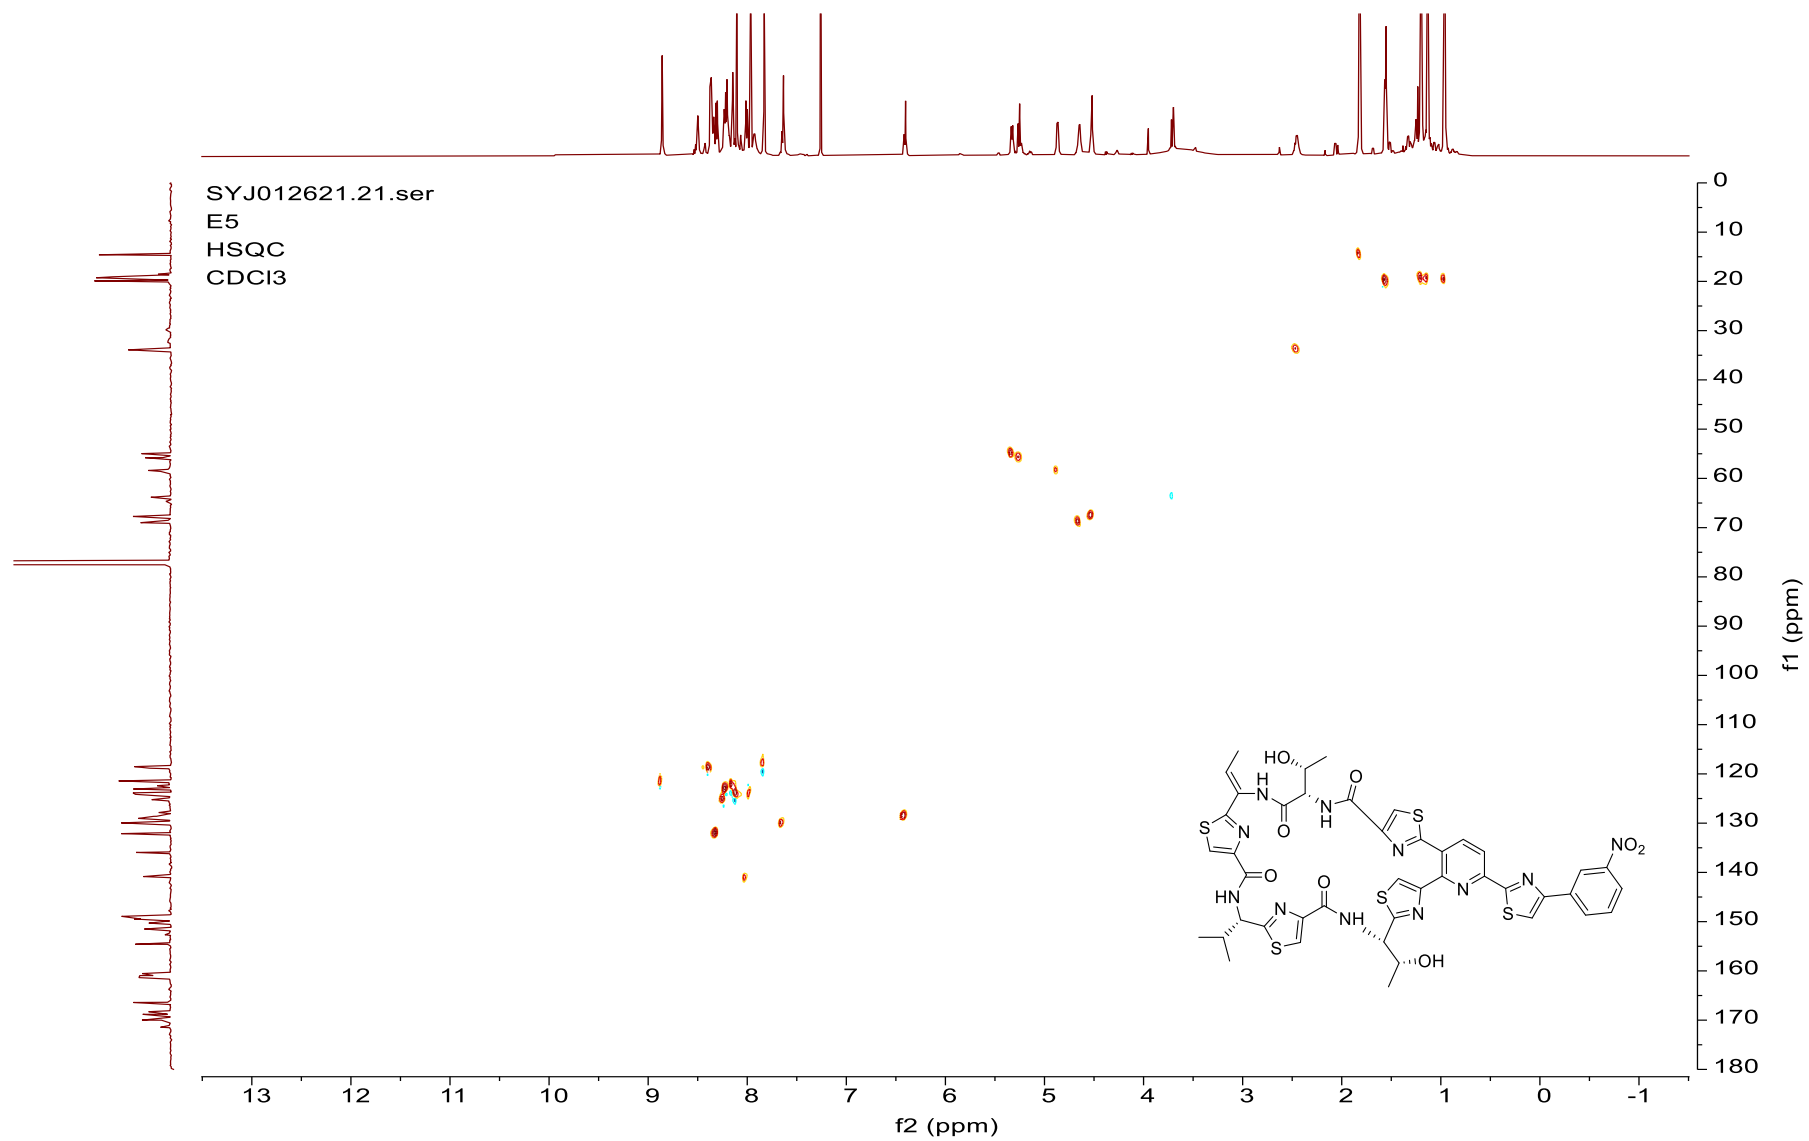

HSQC Spectrum of Compound 22e (600 MHz, CDCl<sub>3</sub>)

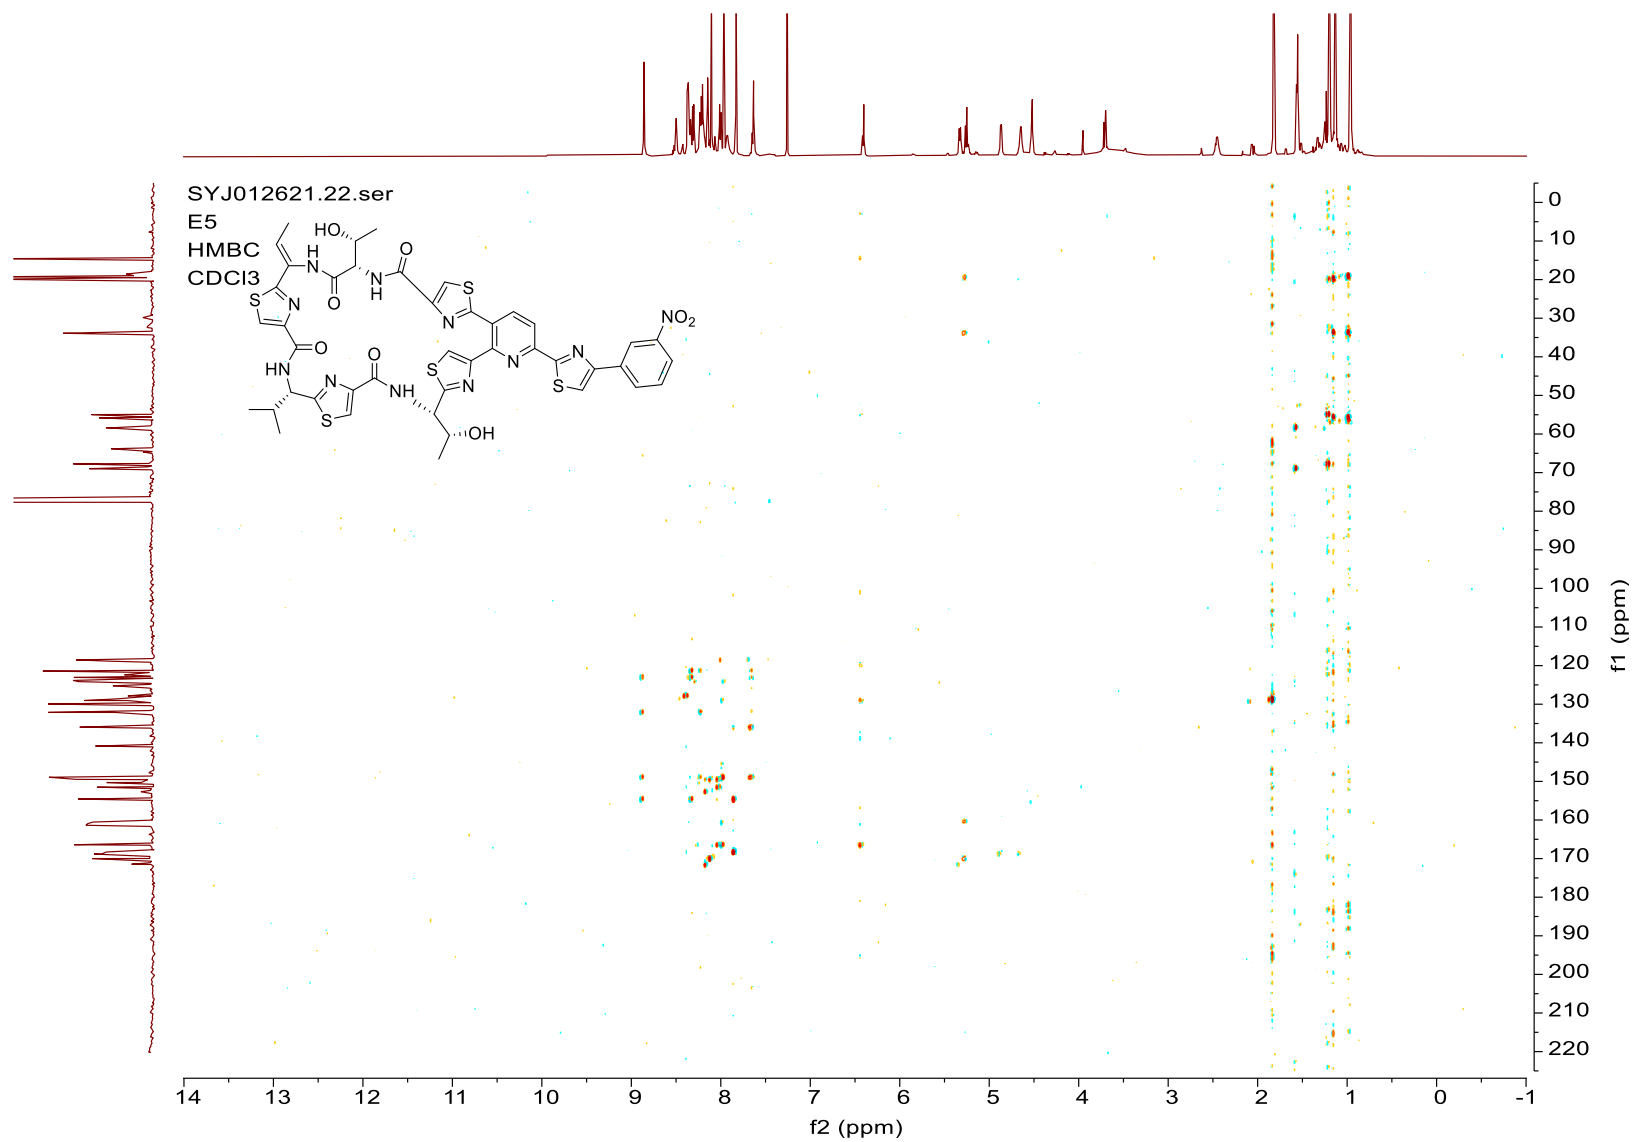

HMBC Spectrum of Compound 22e (600 MHz, CDCl<sub>3</sub>)



SYJ022421.1.fid  
E6  
1H NMR  
CDCl3

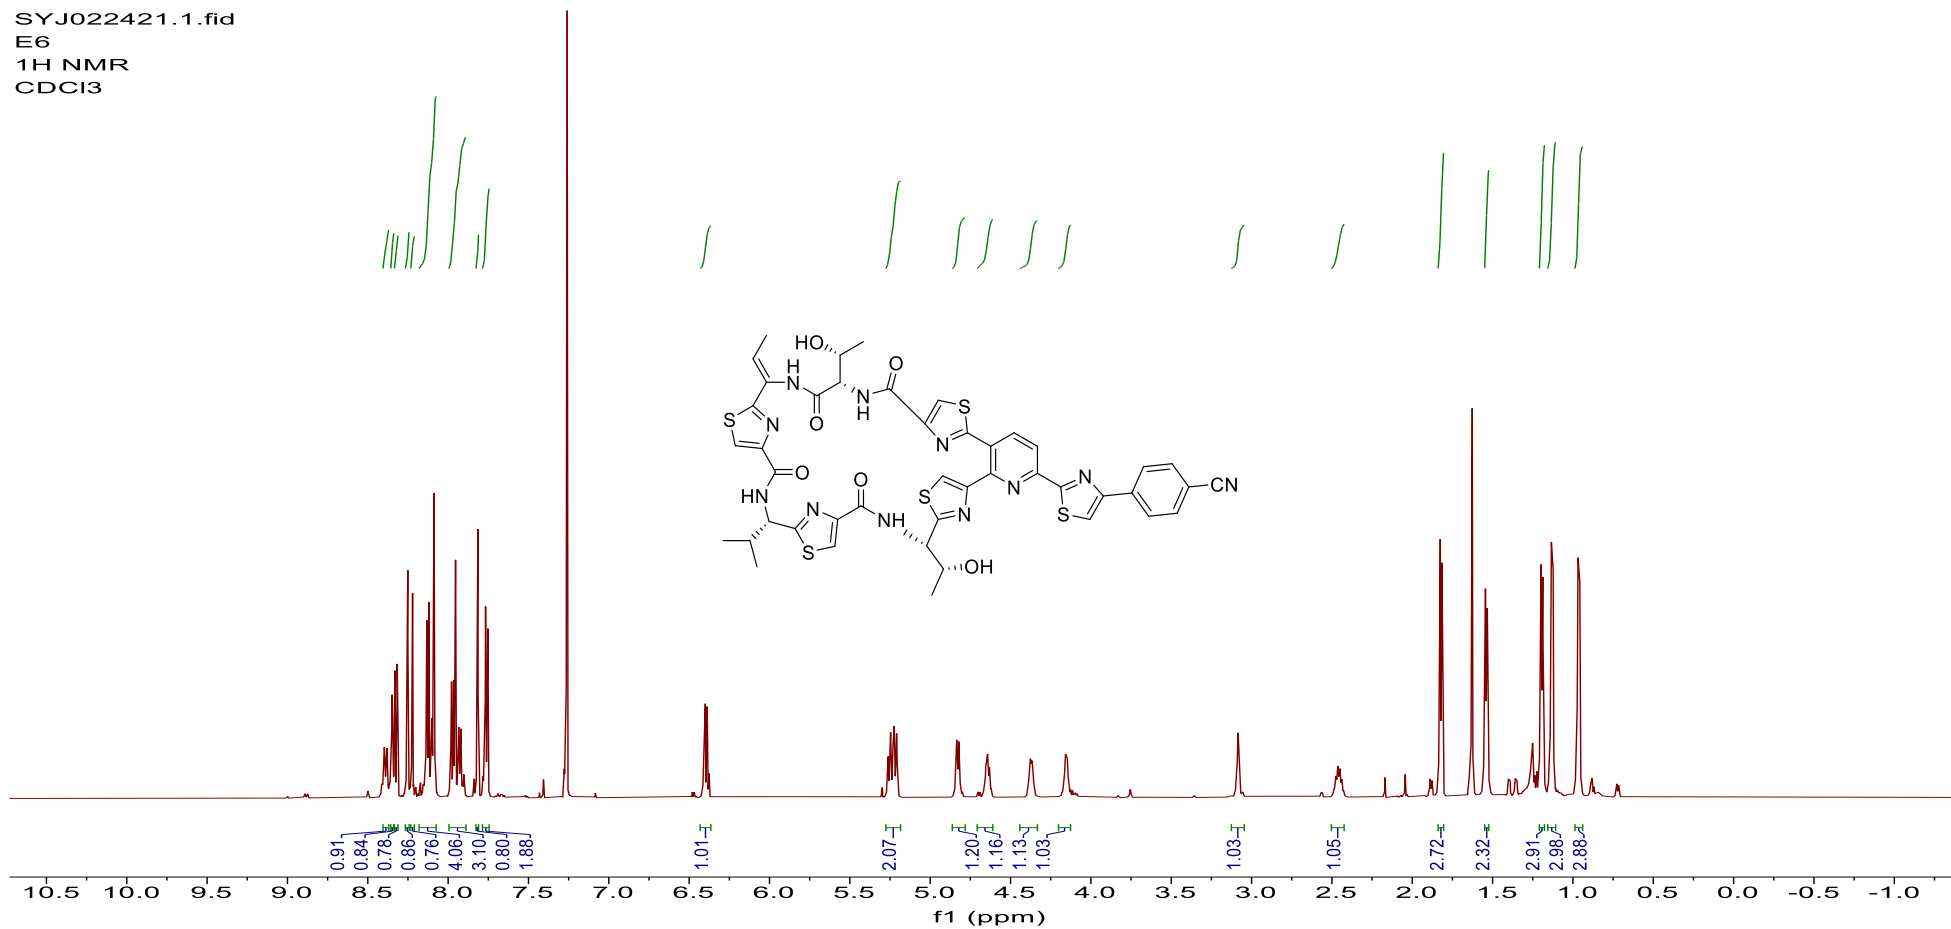

**<sup>1</sup>H-NMR Spectrum of Compound 22f (600 MHz, CDCl<sub>3</sub>)**

SYJ022421.2.fid

E6

<sup>13</sup>C NMR

CDCl<sub>3</sub>

170.34  
169.98  
168.81  
168.49  
166.71  
166.30  
161.35  
161.02  
160.54  
155.11  
153.28  
151.51  
150.50  
150.33  
149.59  
149.04  
141.18  
138.38  
132.87  
129.07  
128.28  
127.58  
126.96  
124.92  
123.93  
123.83  
122.74  
119.08  
119.00  
118.31  
111.83

77.37  
77.16  
76.95  
69.10  
67.82

58.46  
55.80  
54.69

33.93  
29.85  
26.84  
20.51  
20.19  
19.91  
19.24  
18.83  
18.57  
14.63  
14.47  
14.27

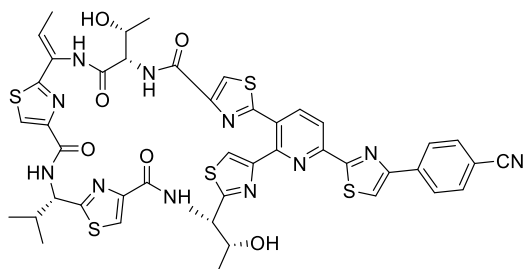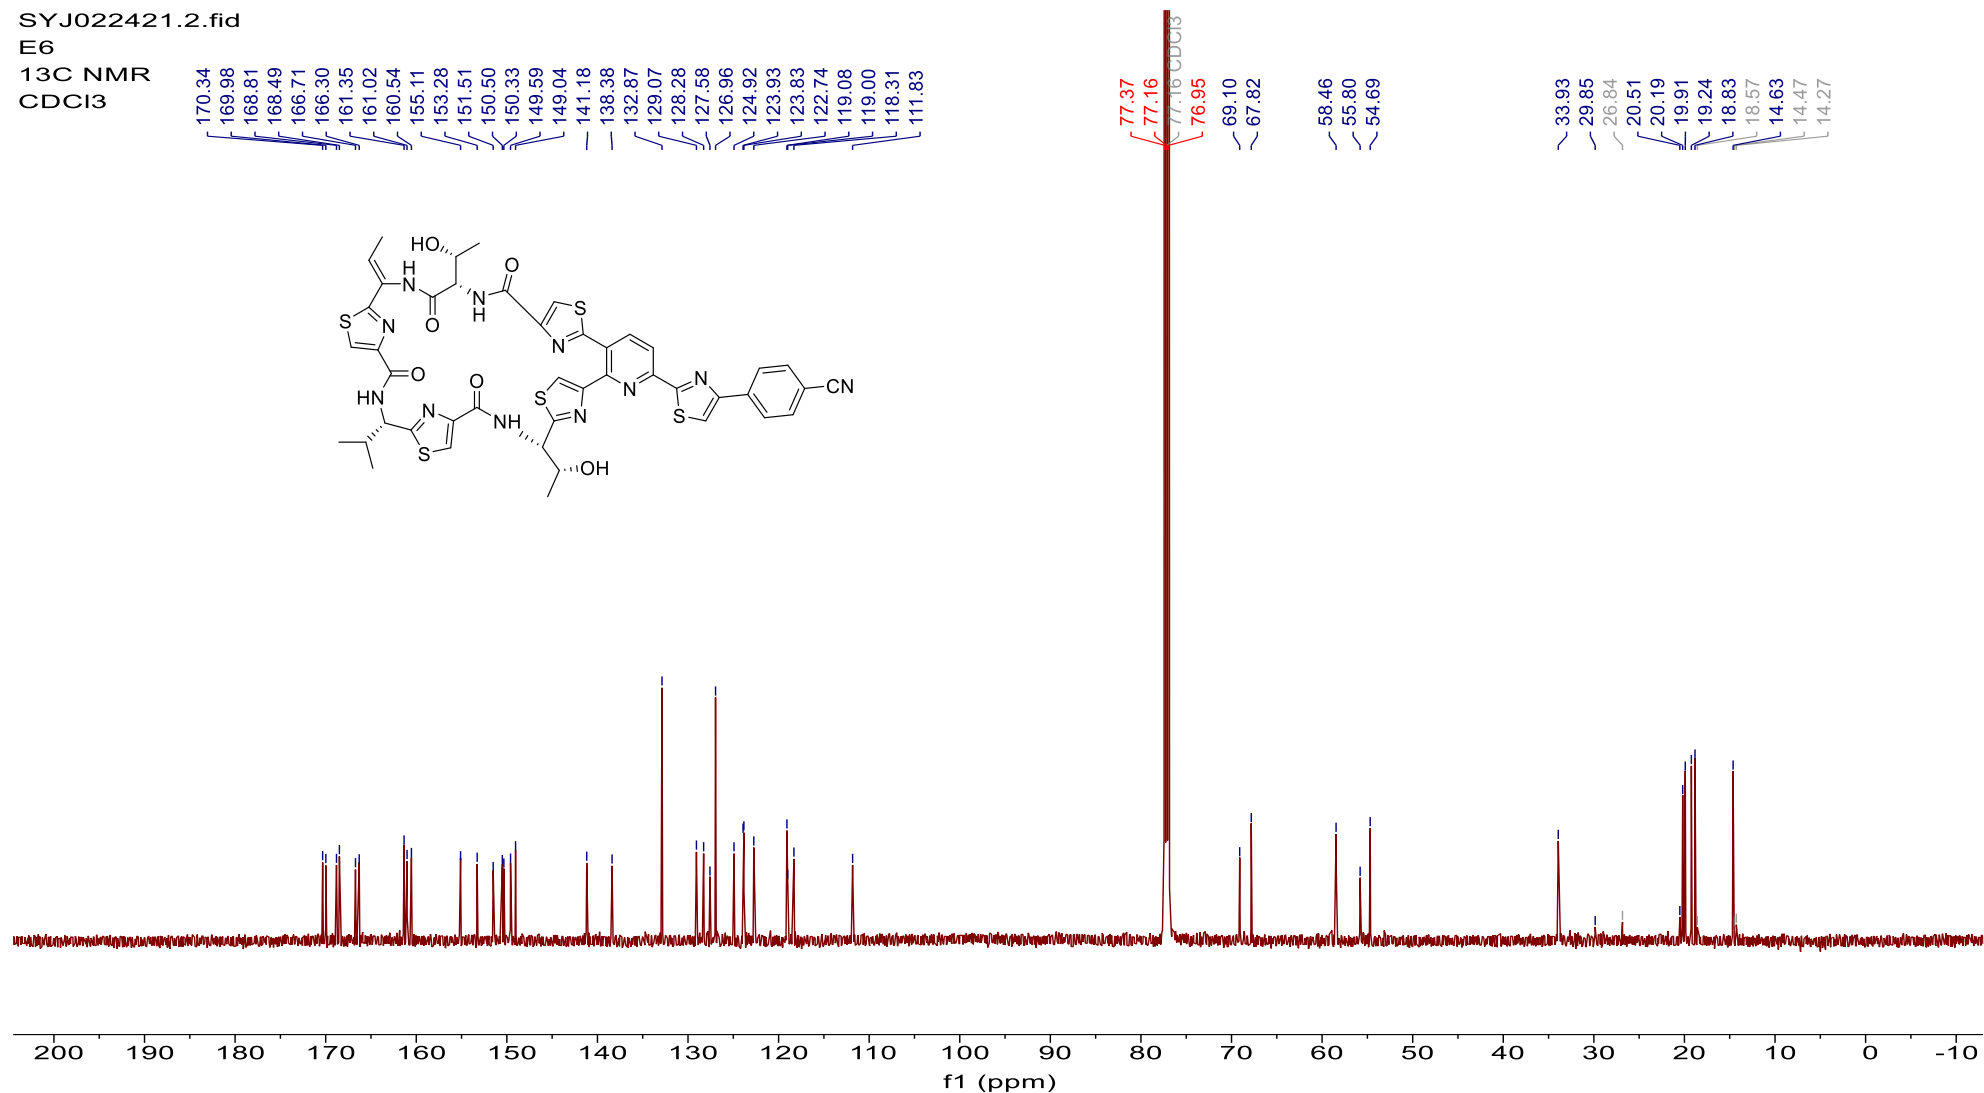

<sup>13</sup>C-NMR Spectrum of Compound 22f (151 MHz, CDCl<sub>3</sub>)

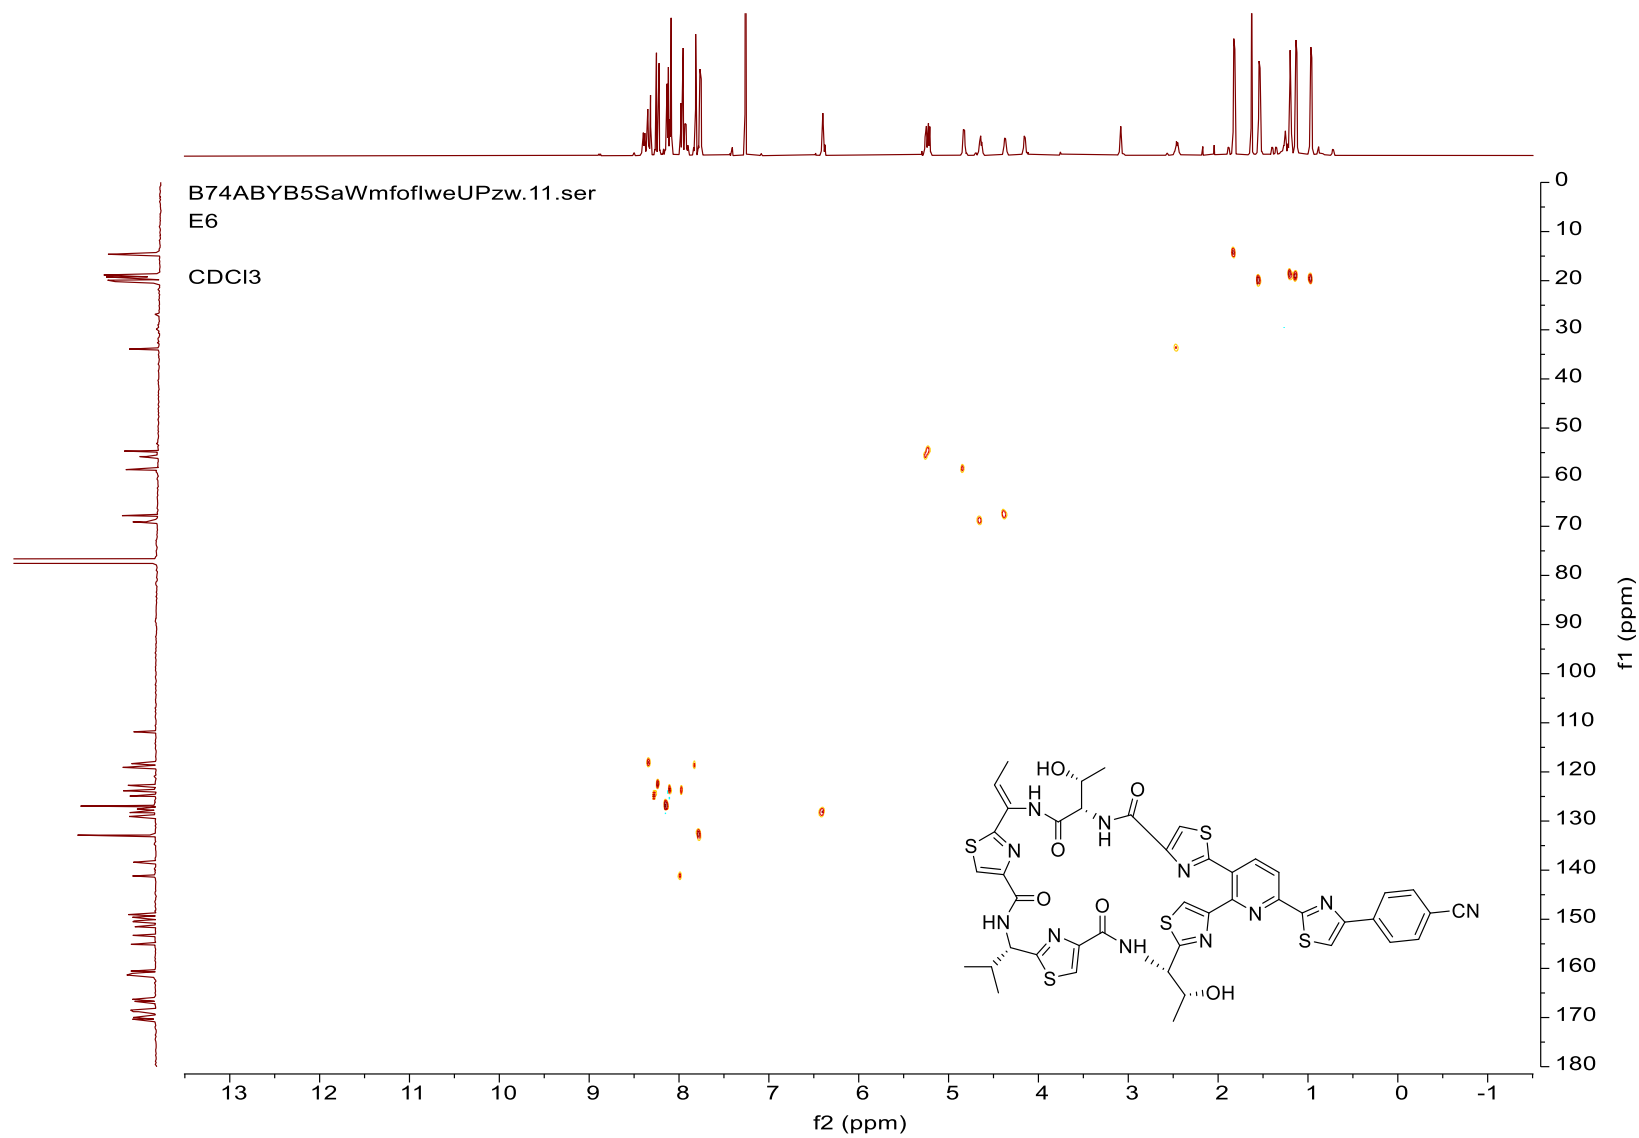

HSQC Spectrum of Compound 22f (600 MHz, CDCl<sub>3</sub>)

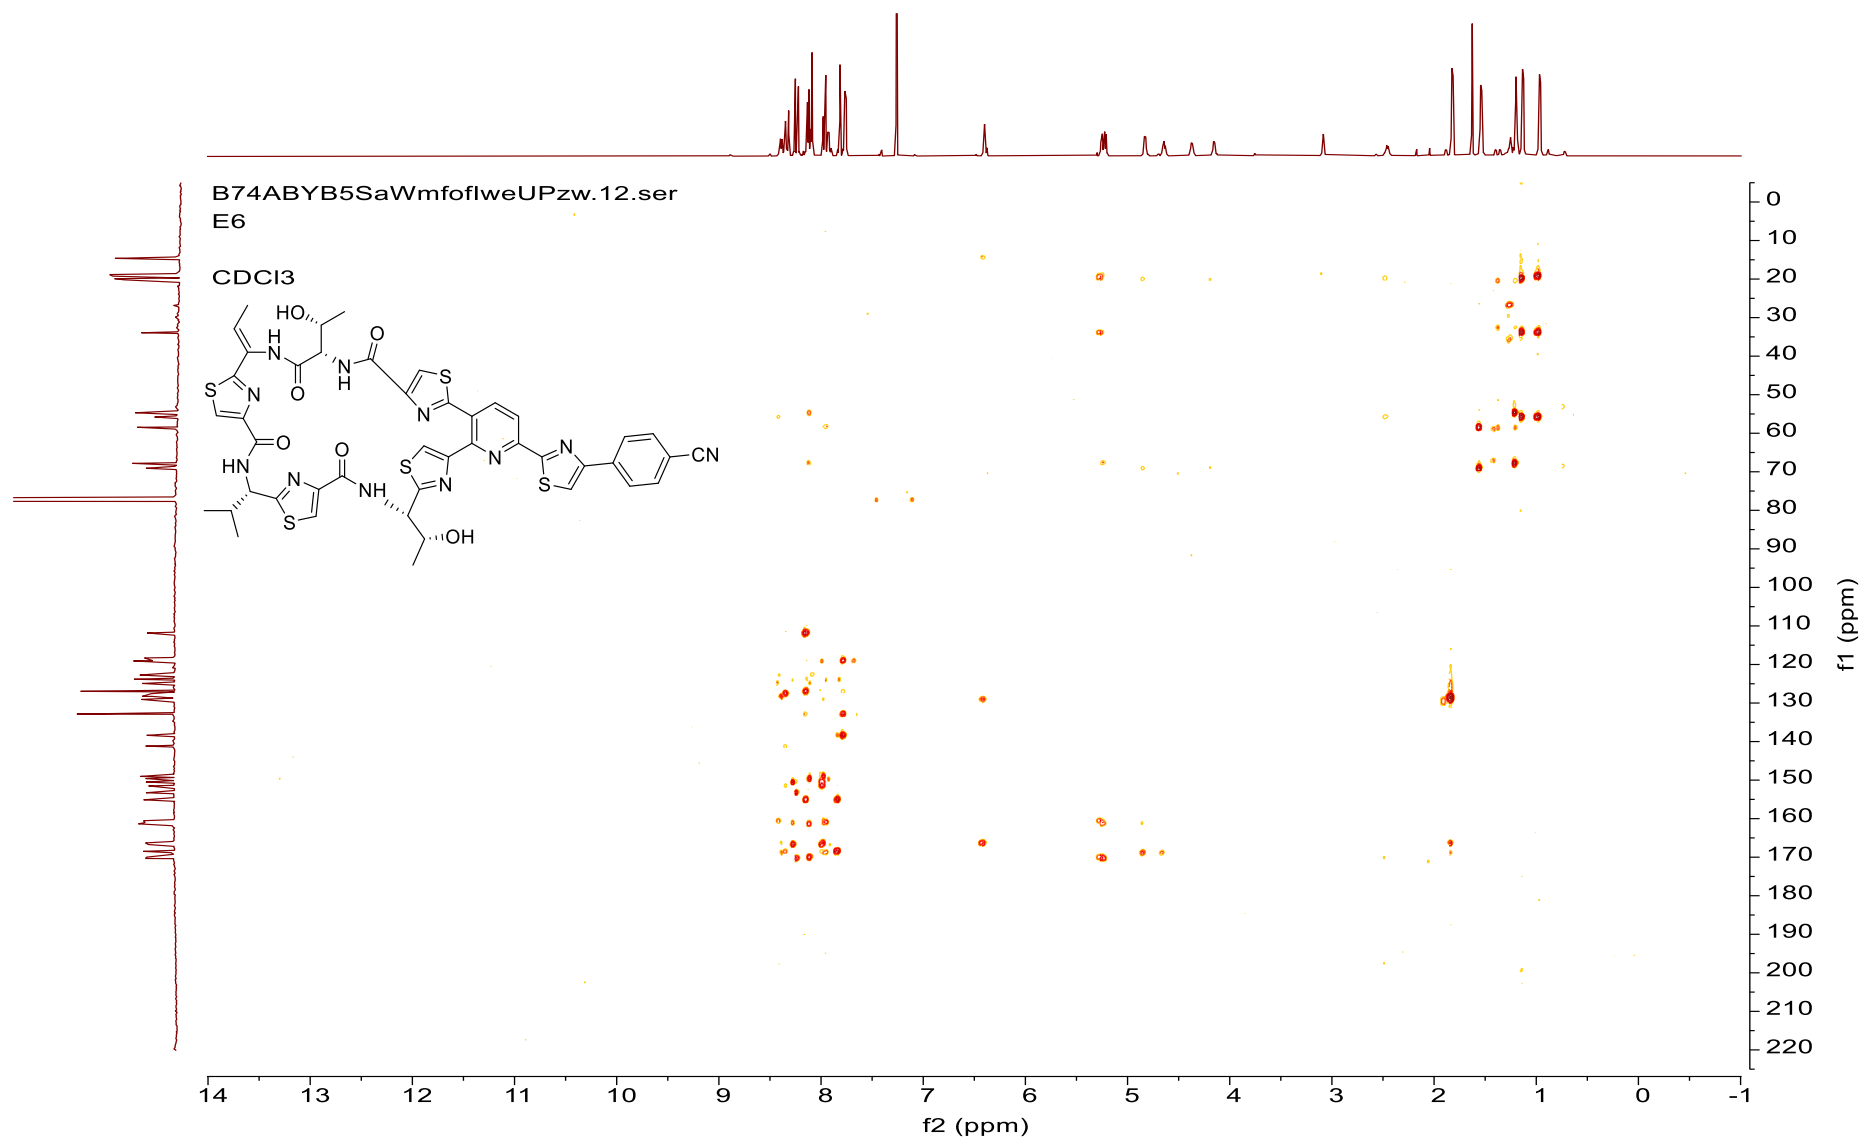

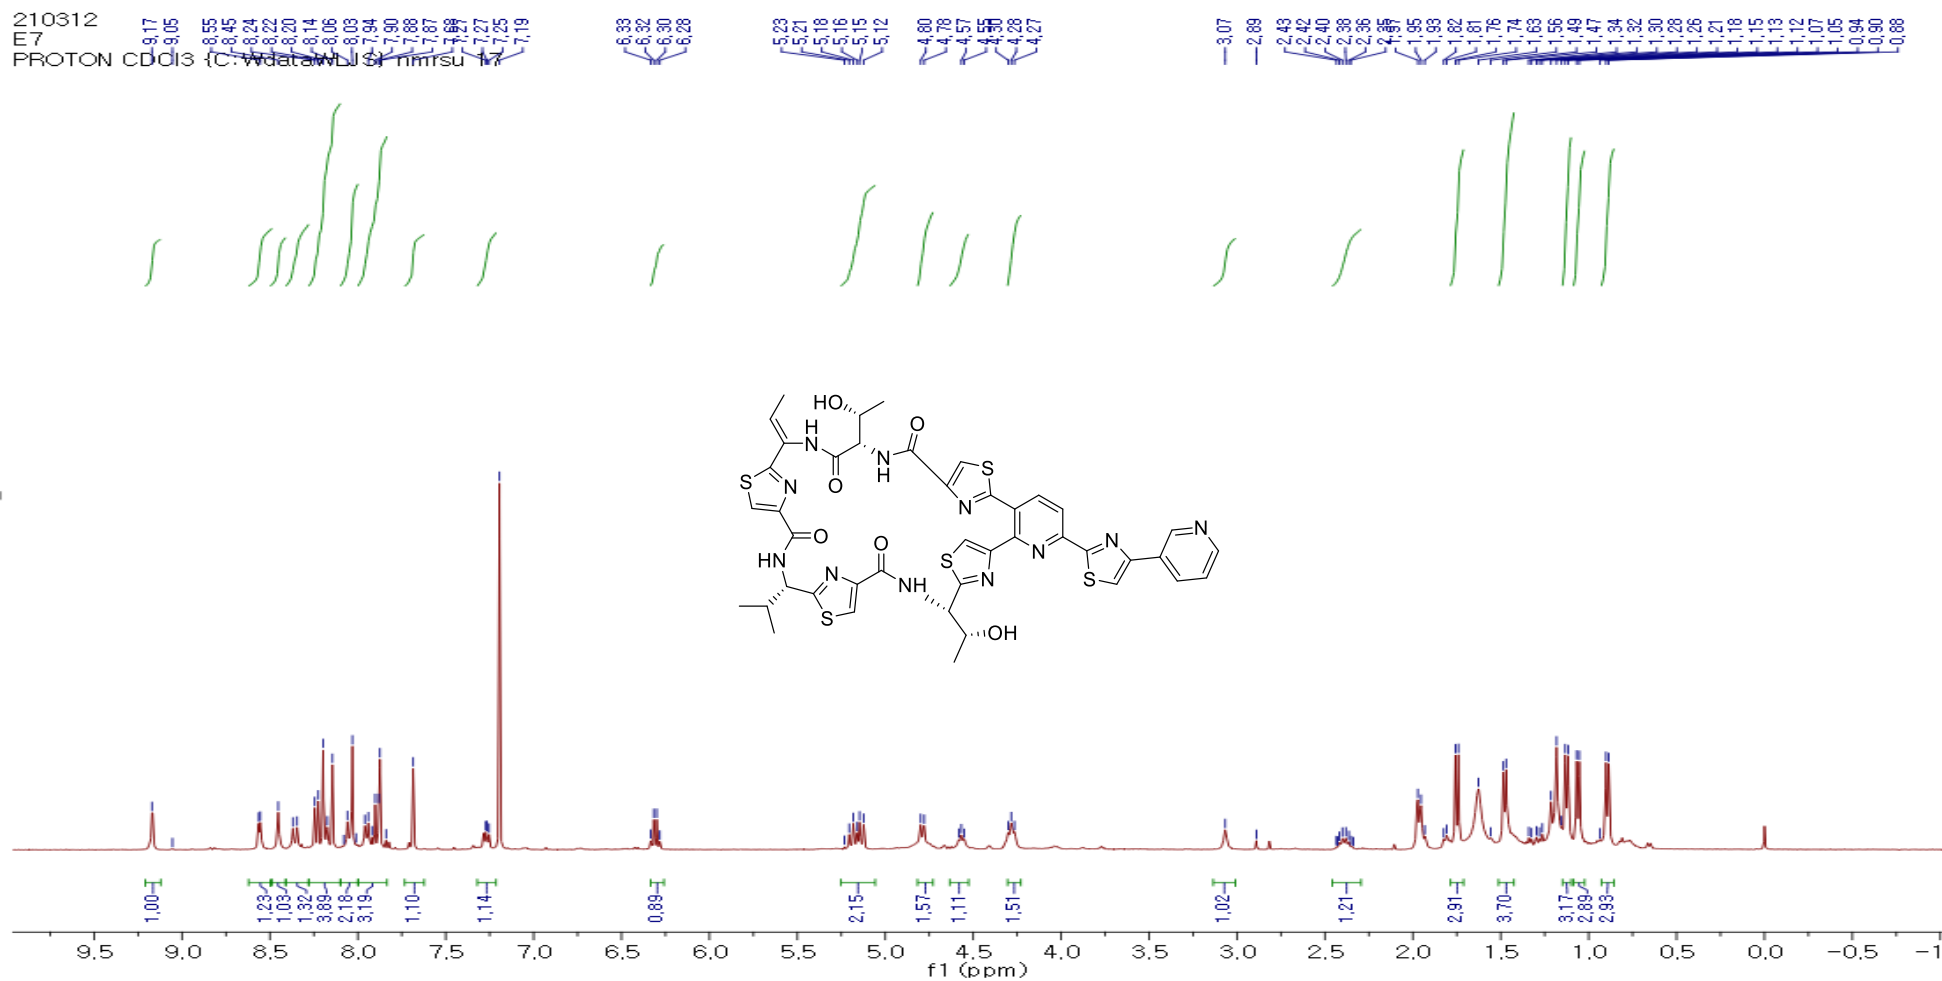

**<sup>1</sup>H-NMR Spectrum of Compound 22g (400 MHz, CDCl<sub>3</sub>)**

SYJ122920.61.fid

E7

<sup>13</sup>C NMR

CDCl<sub>3</sub>

170.27  
170.03  
168.87  
166.76  
166.30  
161.34  
161.08  
160.53  
153.23  
151.50  
150.53  
150.20  
149.59  
149.00  
147.90  
143.16  
142.92  
141.24  
130.64  
129.06  
128.53  
128.27  
127.52  
124.95  
124.13  
123.91  
123.80  
122.74  
118.32  
118.05

77.37  
77.16  
77.16 CDCl<sub>3</sub>  
76.95  
69.15  
67.81  
58.60  
55.81  
54.65  
33.95  
29.85  
20.51  
20.27  
19.91  
19.21  
18.82  
14.64

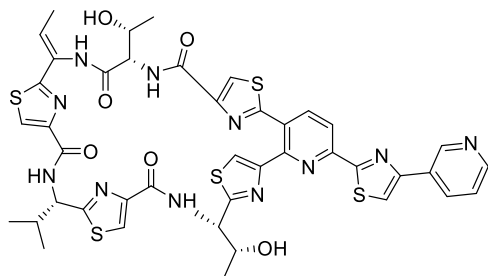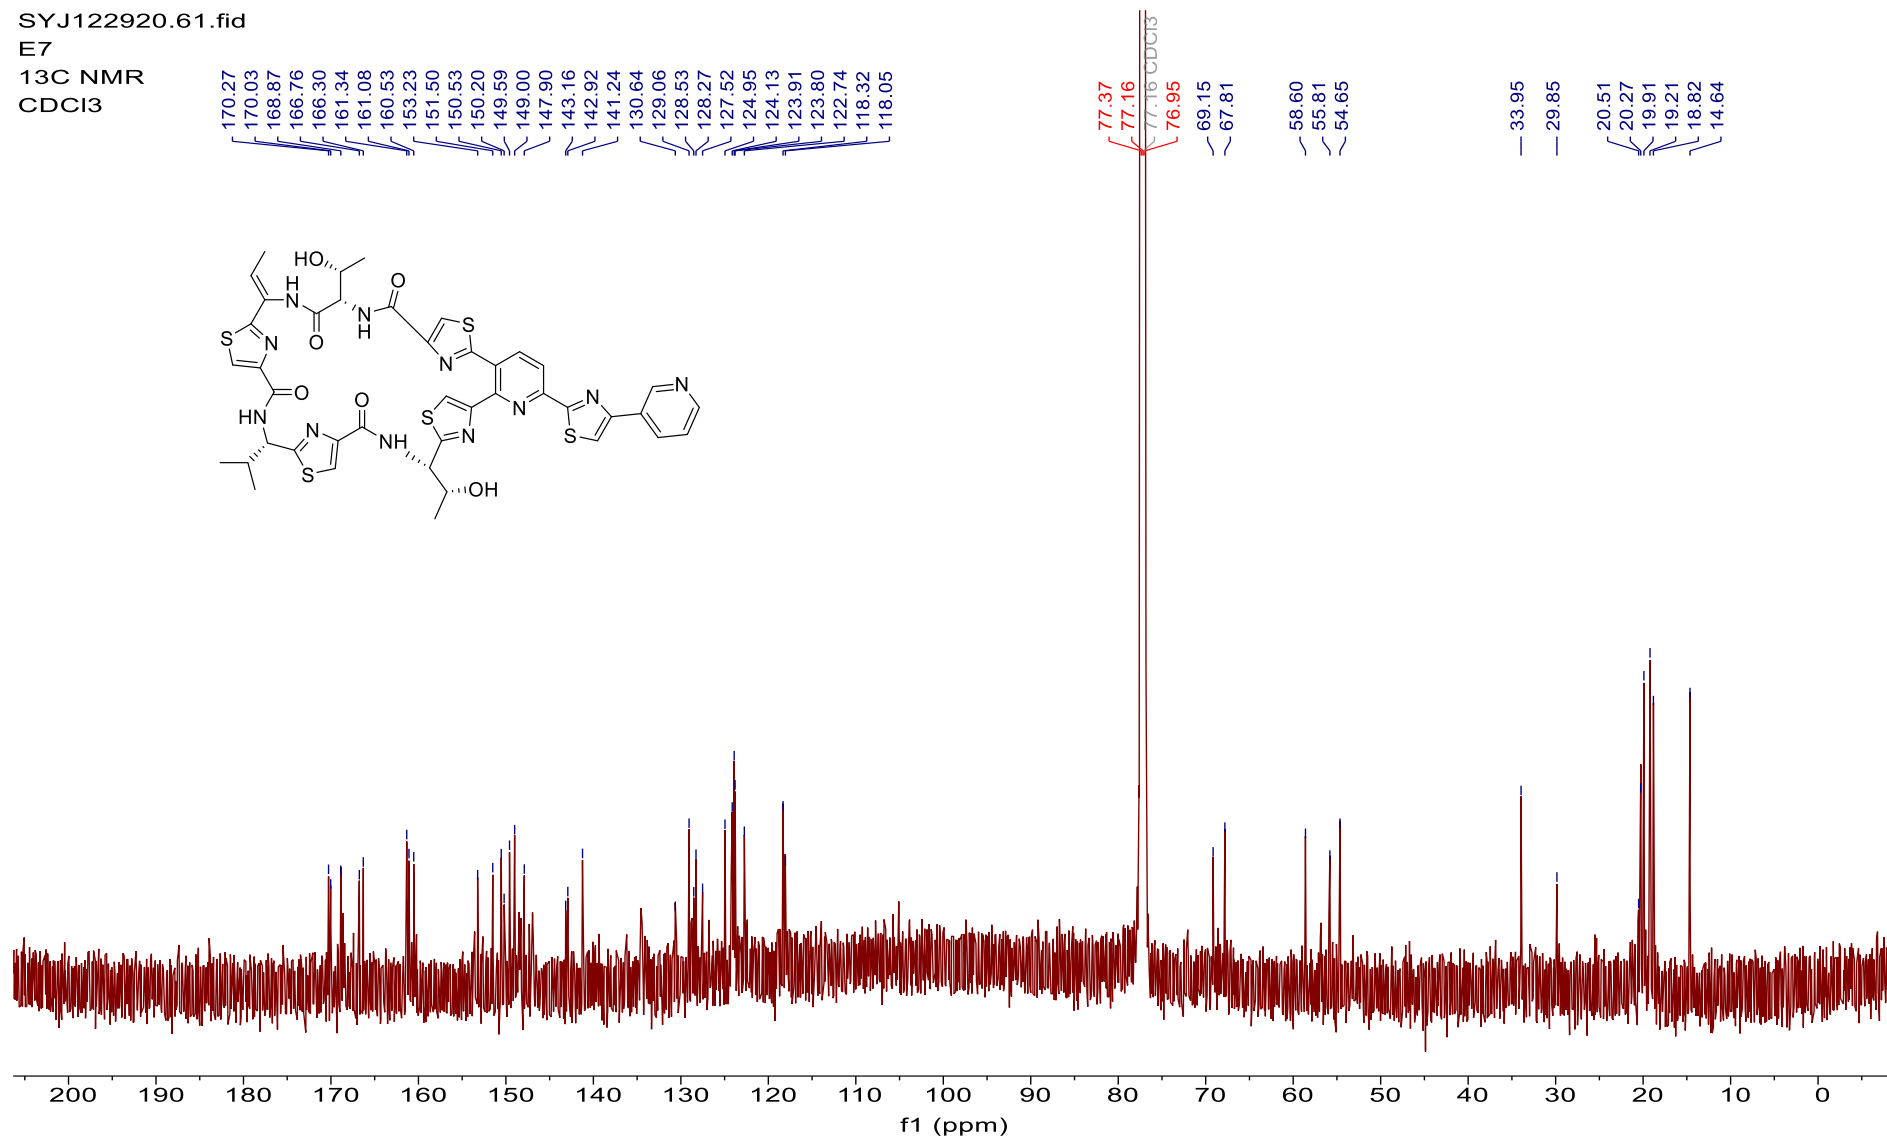

<sup>13</sup>C-NMR Spectrum of Compound 22g (151 MHz, CDCl<sub>3</sub>)

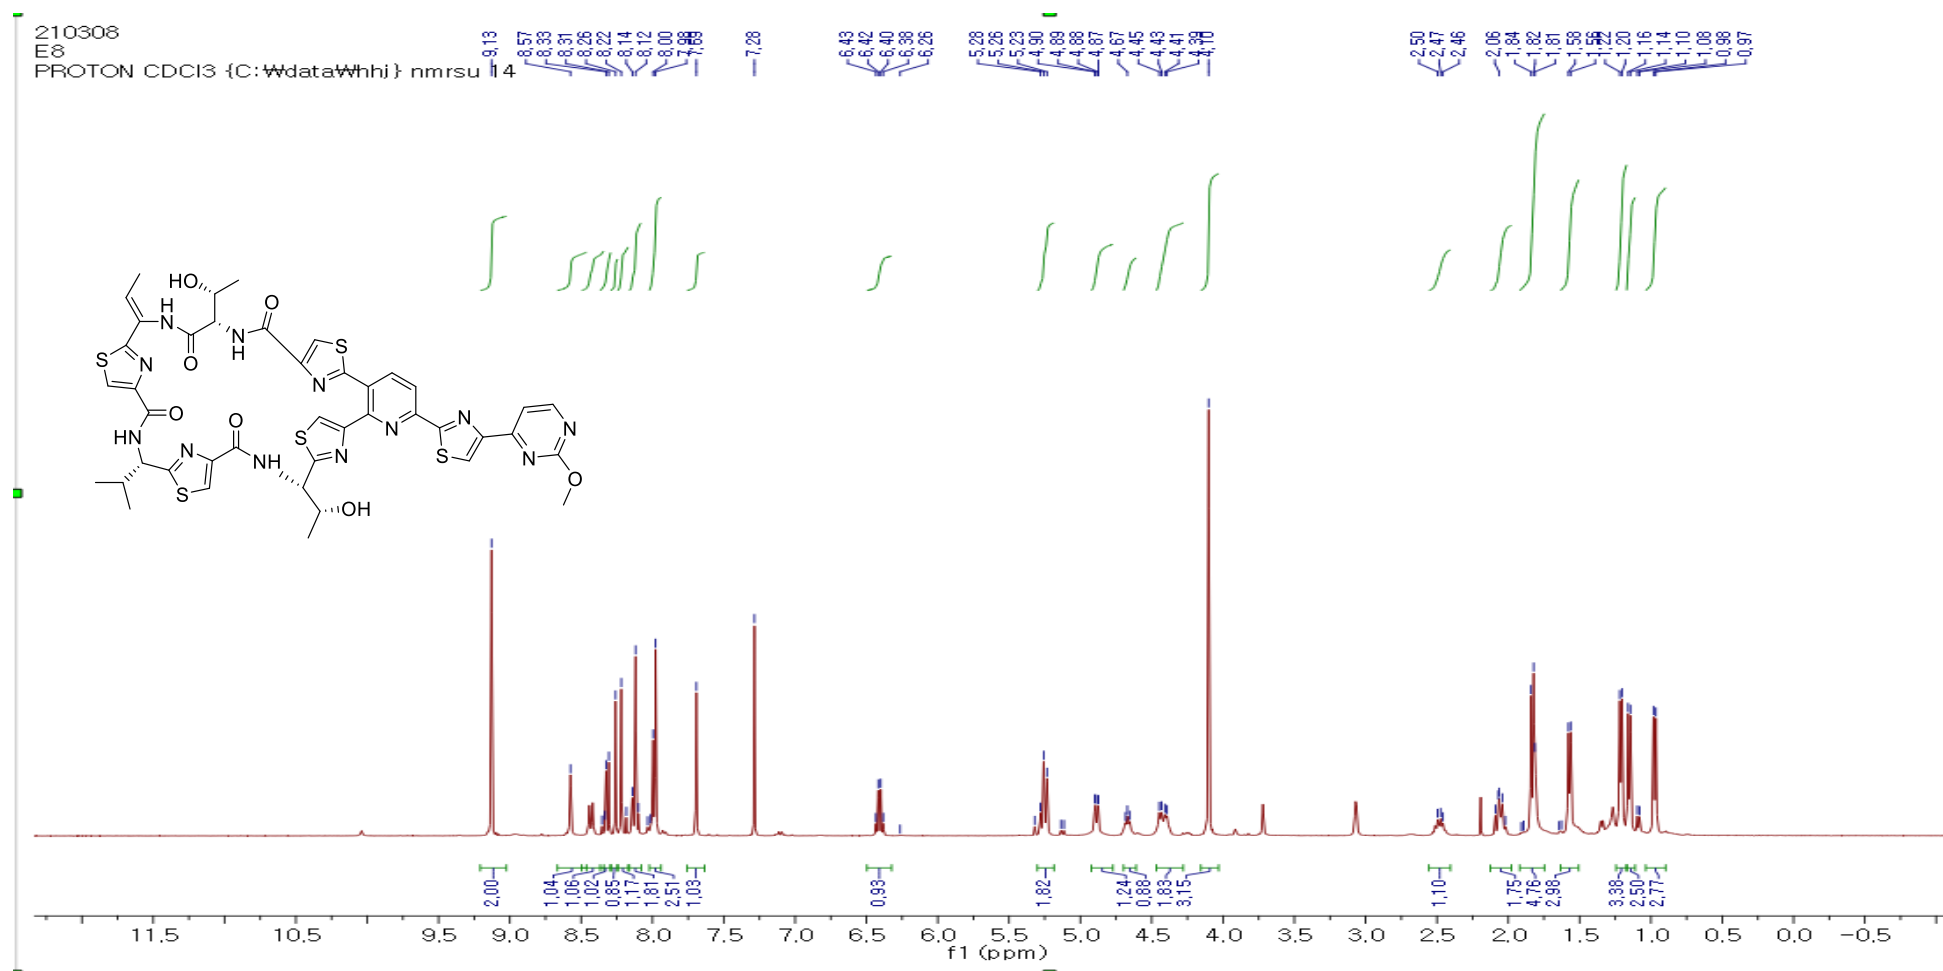

<sup>1</sup>H-NMR Spectrum of Compound 22h (400 MHz, CDCl<sub>3</sub>)

210308

C13CPD CDCI3 {C:\data\whi\11m\su

170.26  
169.85  
168.67  
168.63  
166.59  
166.17  
165.28  
161.23  
160.89  
160.43  
157.12  
153.21  
151.34  
151.06  
150.31  
150.25  
149.48  
148.89  
140.99  
128.99  
128.09  
127.41  
124.79  
123.85  
123.88  
122.50  
118.18  
116.42

68.85  
67.61  
63.70  
58.30  
55.71  
55.20  
54.68

33.75

19.84  
19.79  
19.15  
18.74  
14.47

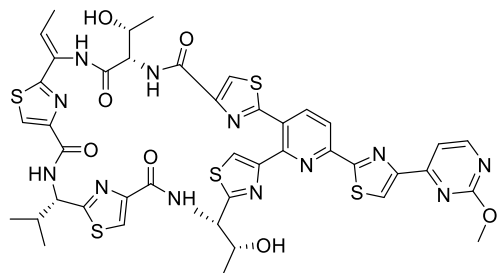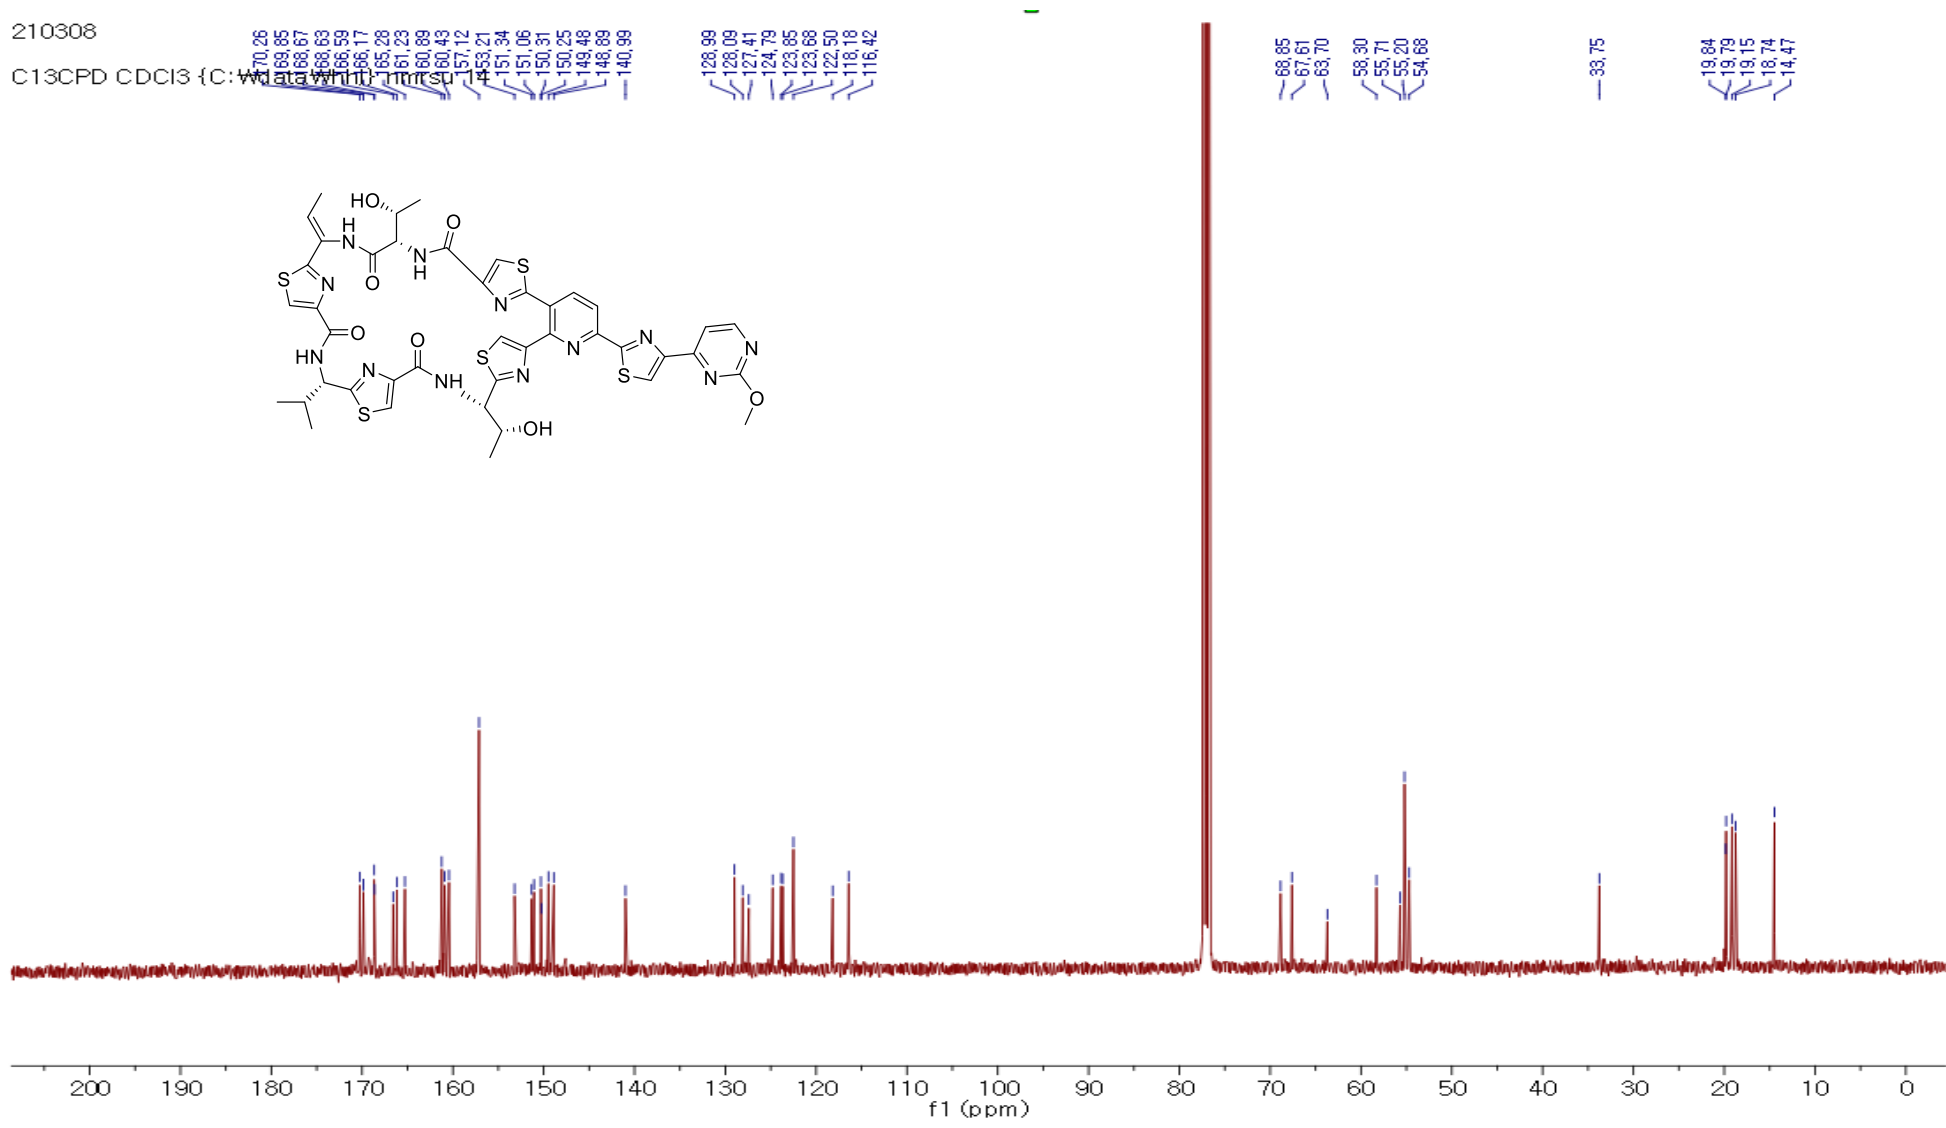

<sup>13</sup>C-NMR Spectrum of Compound 22h (100 MHz, CDCl<sub>3</sub>)



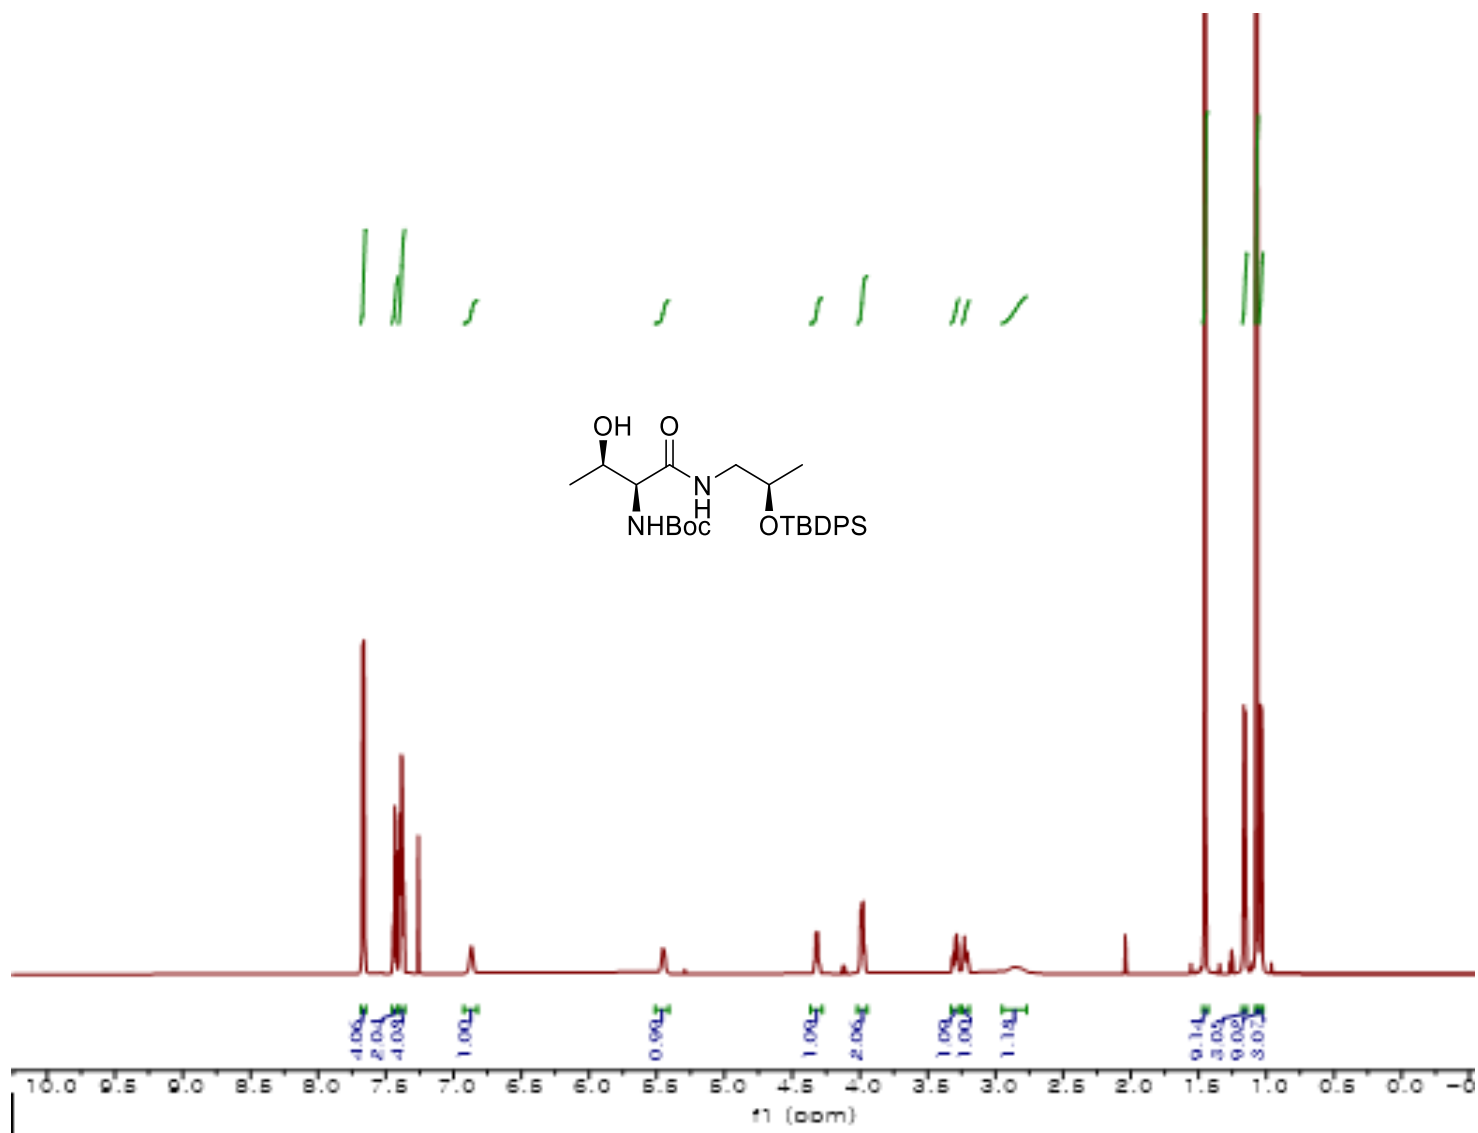

**<sup>1</sup>H-NMR Spectrum of Compound 27 (600 MHz, CDCl<sub>3</sub>)**

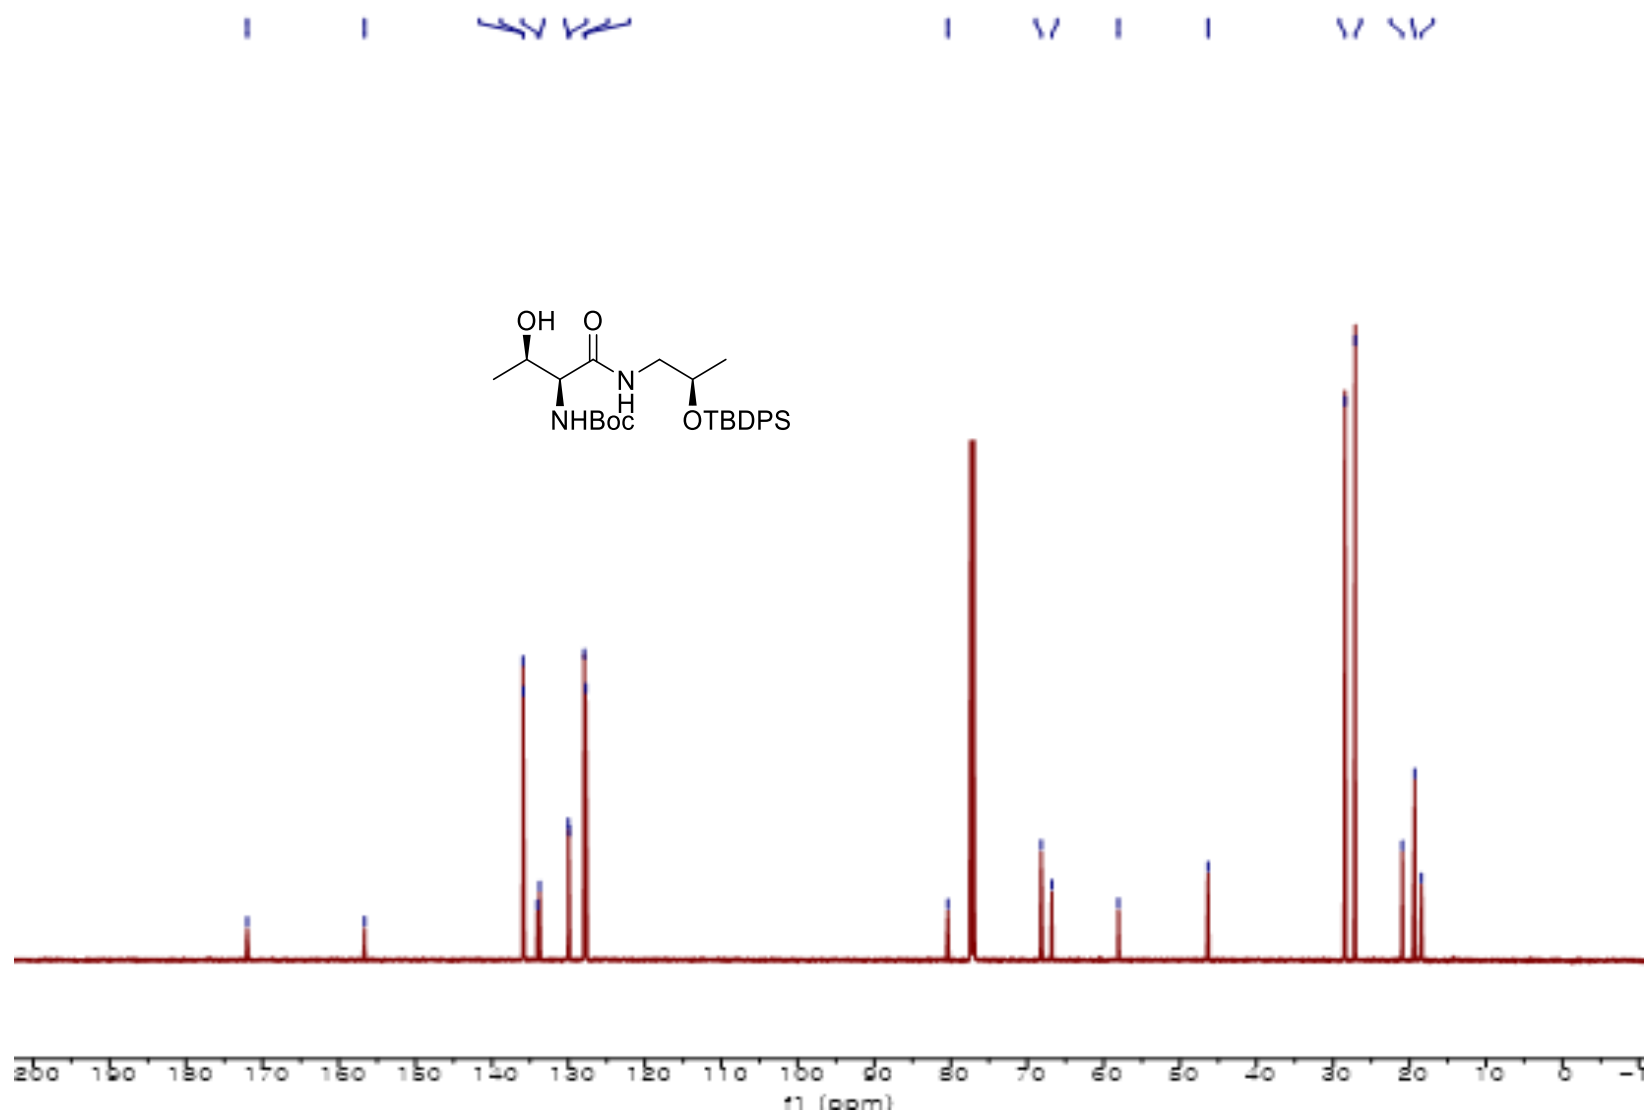

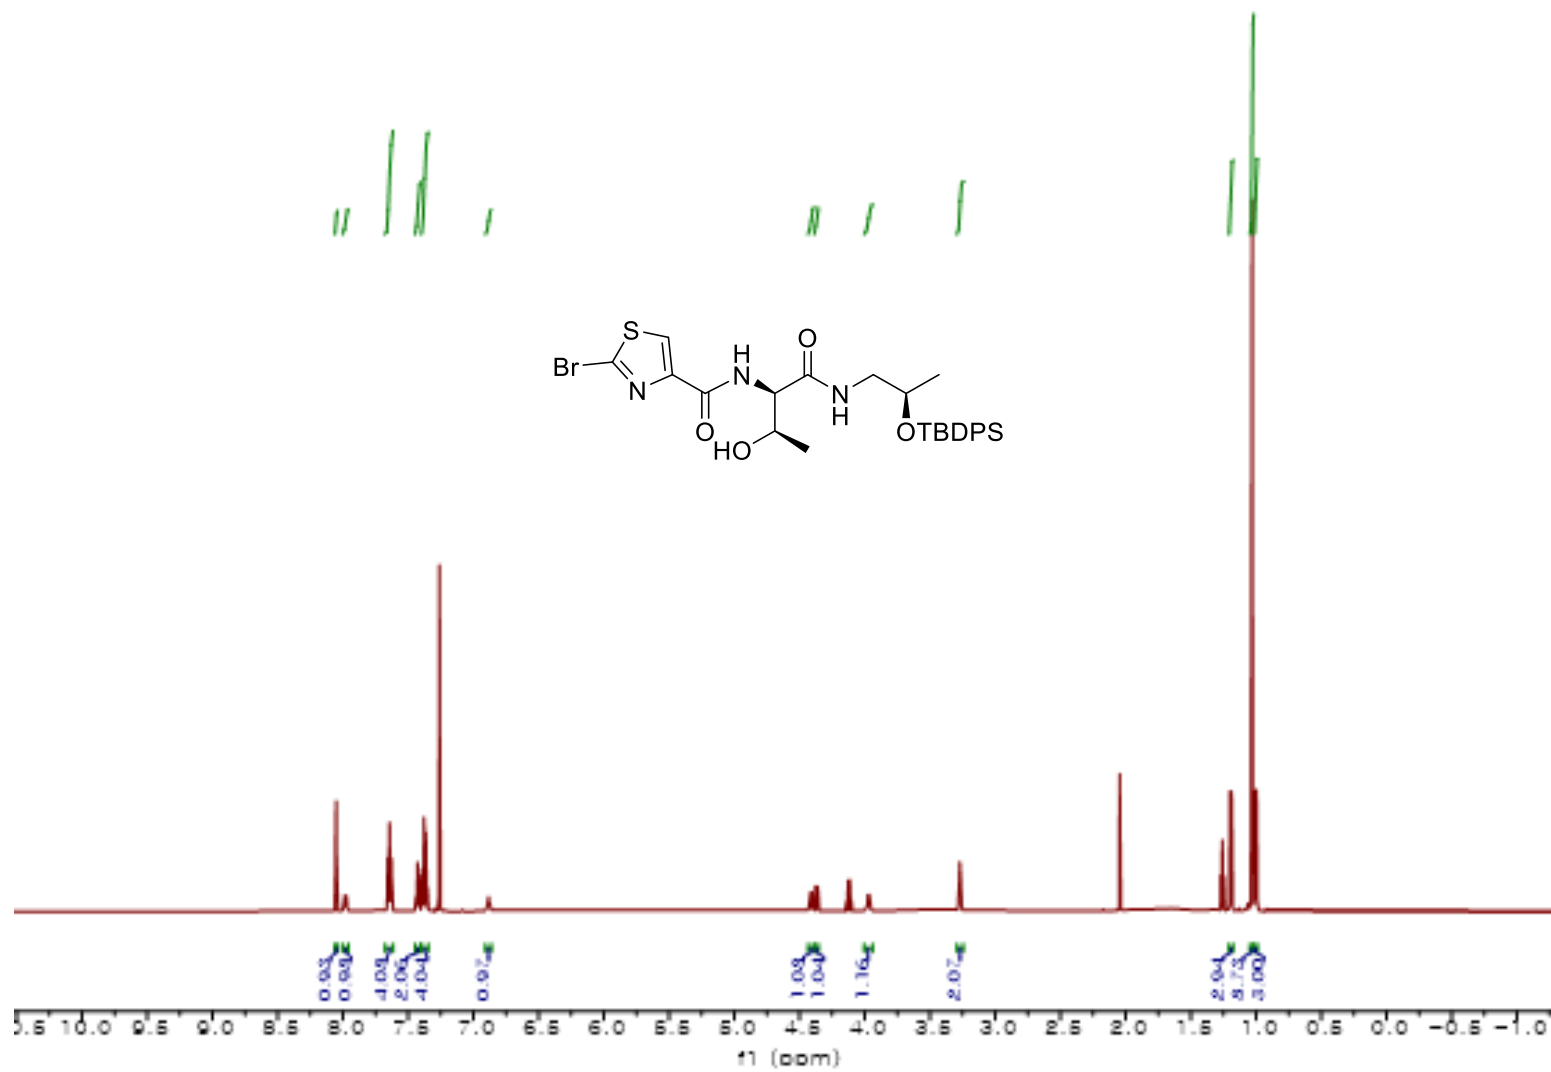

<sup>1</sup>H-NMR Spectrum of Compound 28 (600 MHz, CDCl<sub>3</sub>)

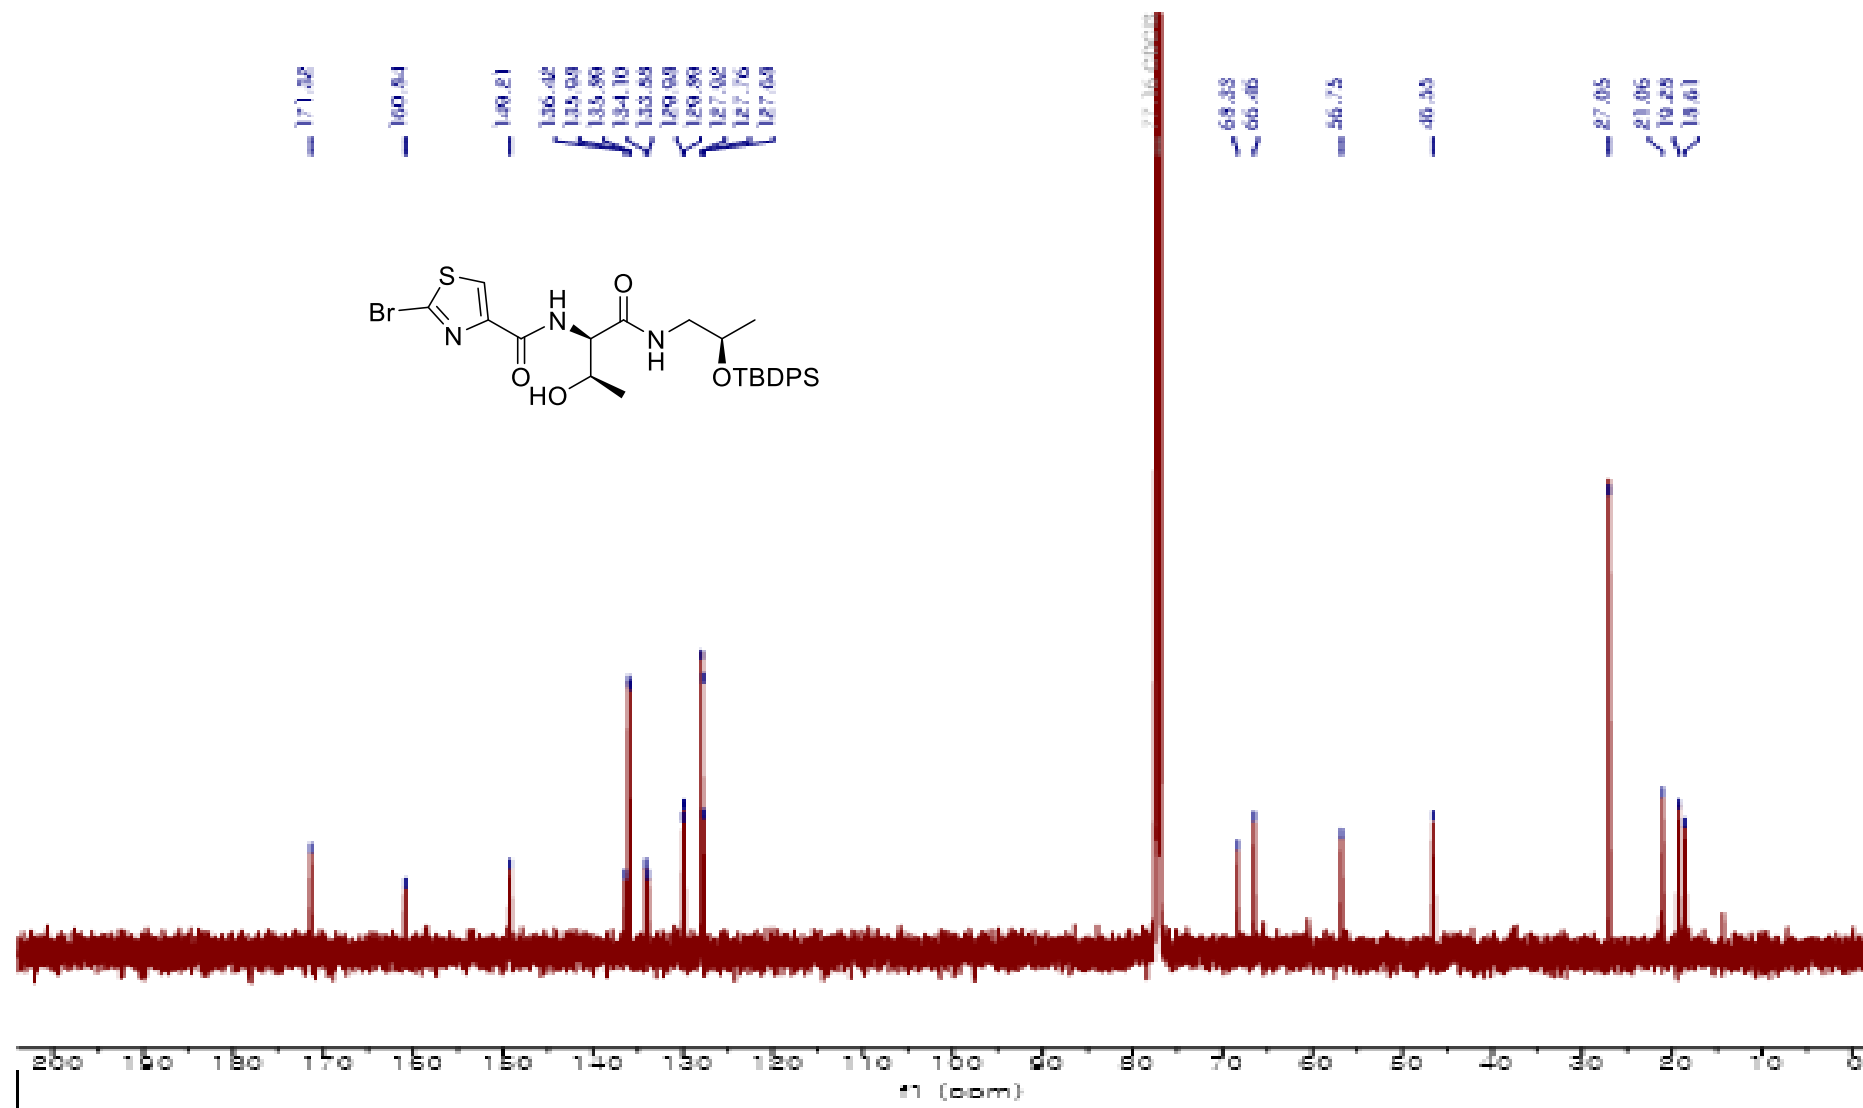

<sup>13</sup>C-NMR Spectrum of Compound 28 (151 MHz, CDCl<sub>3</sub>)

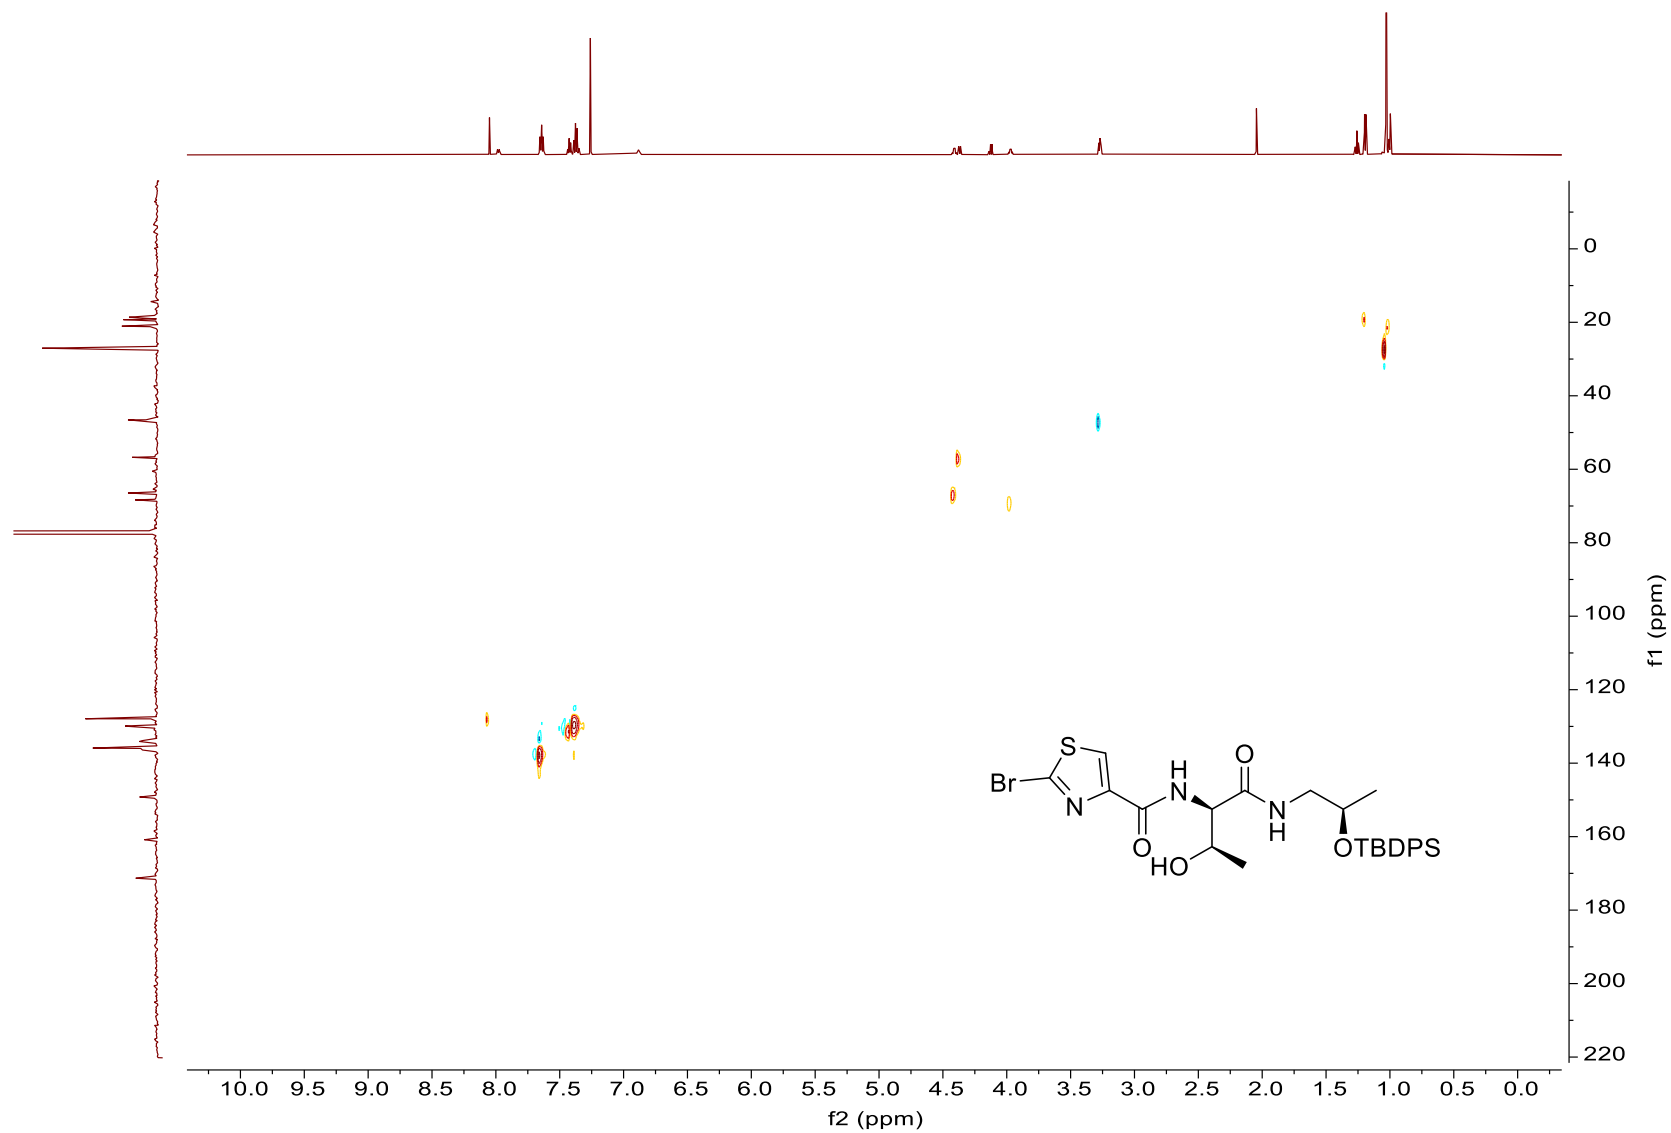

HSQC Spectrum of Compound 28 (600 MHz, CDCl<sub>3</sub>)

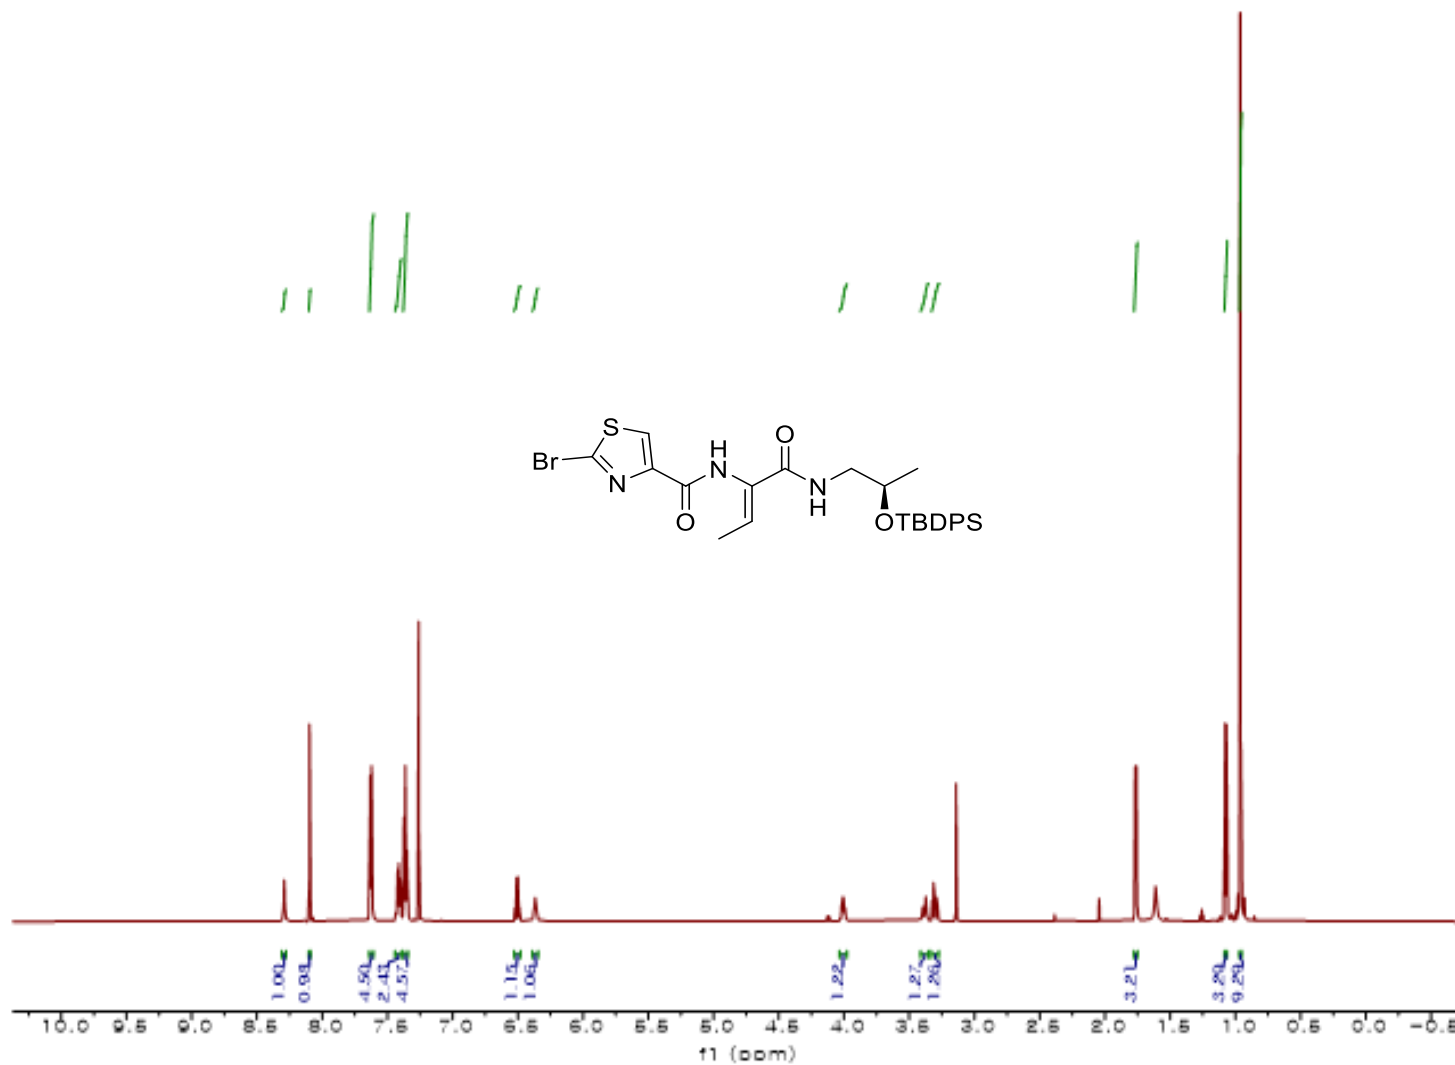

**<sup>1</sup>H-NMR Spectrum of Compound 29 (600 MHz, CDCl<sub>3</sub>)**

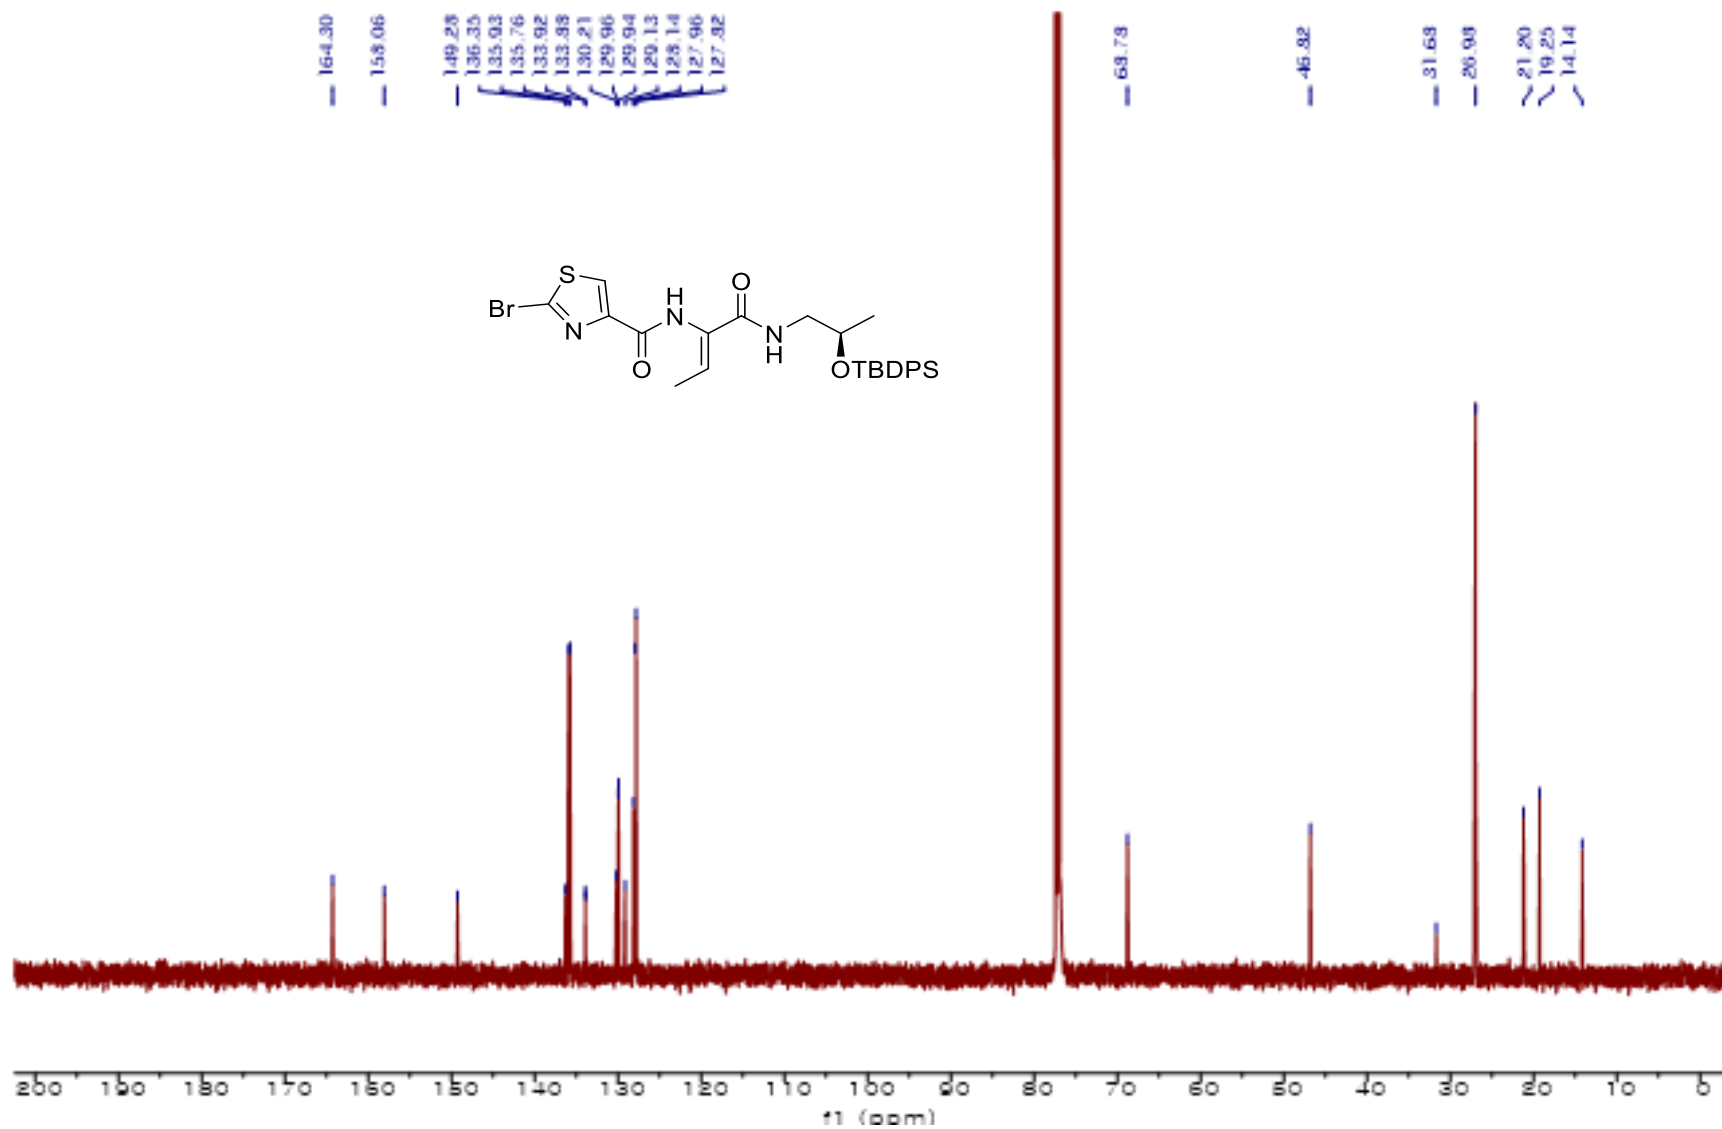

<sup>13</sup>C-NMR Spectrum of Compound 29 (151 MHz, CDCl<sub>3</sub>)

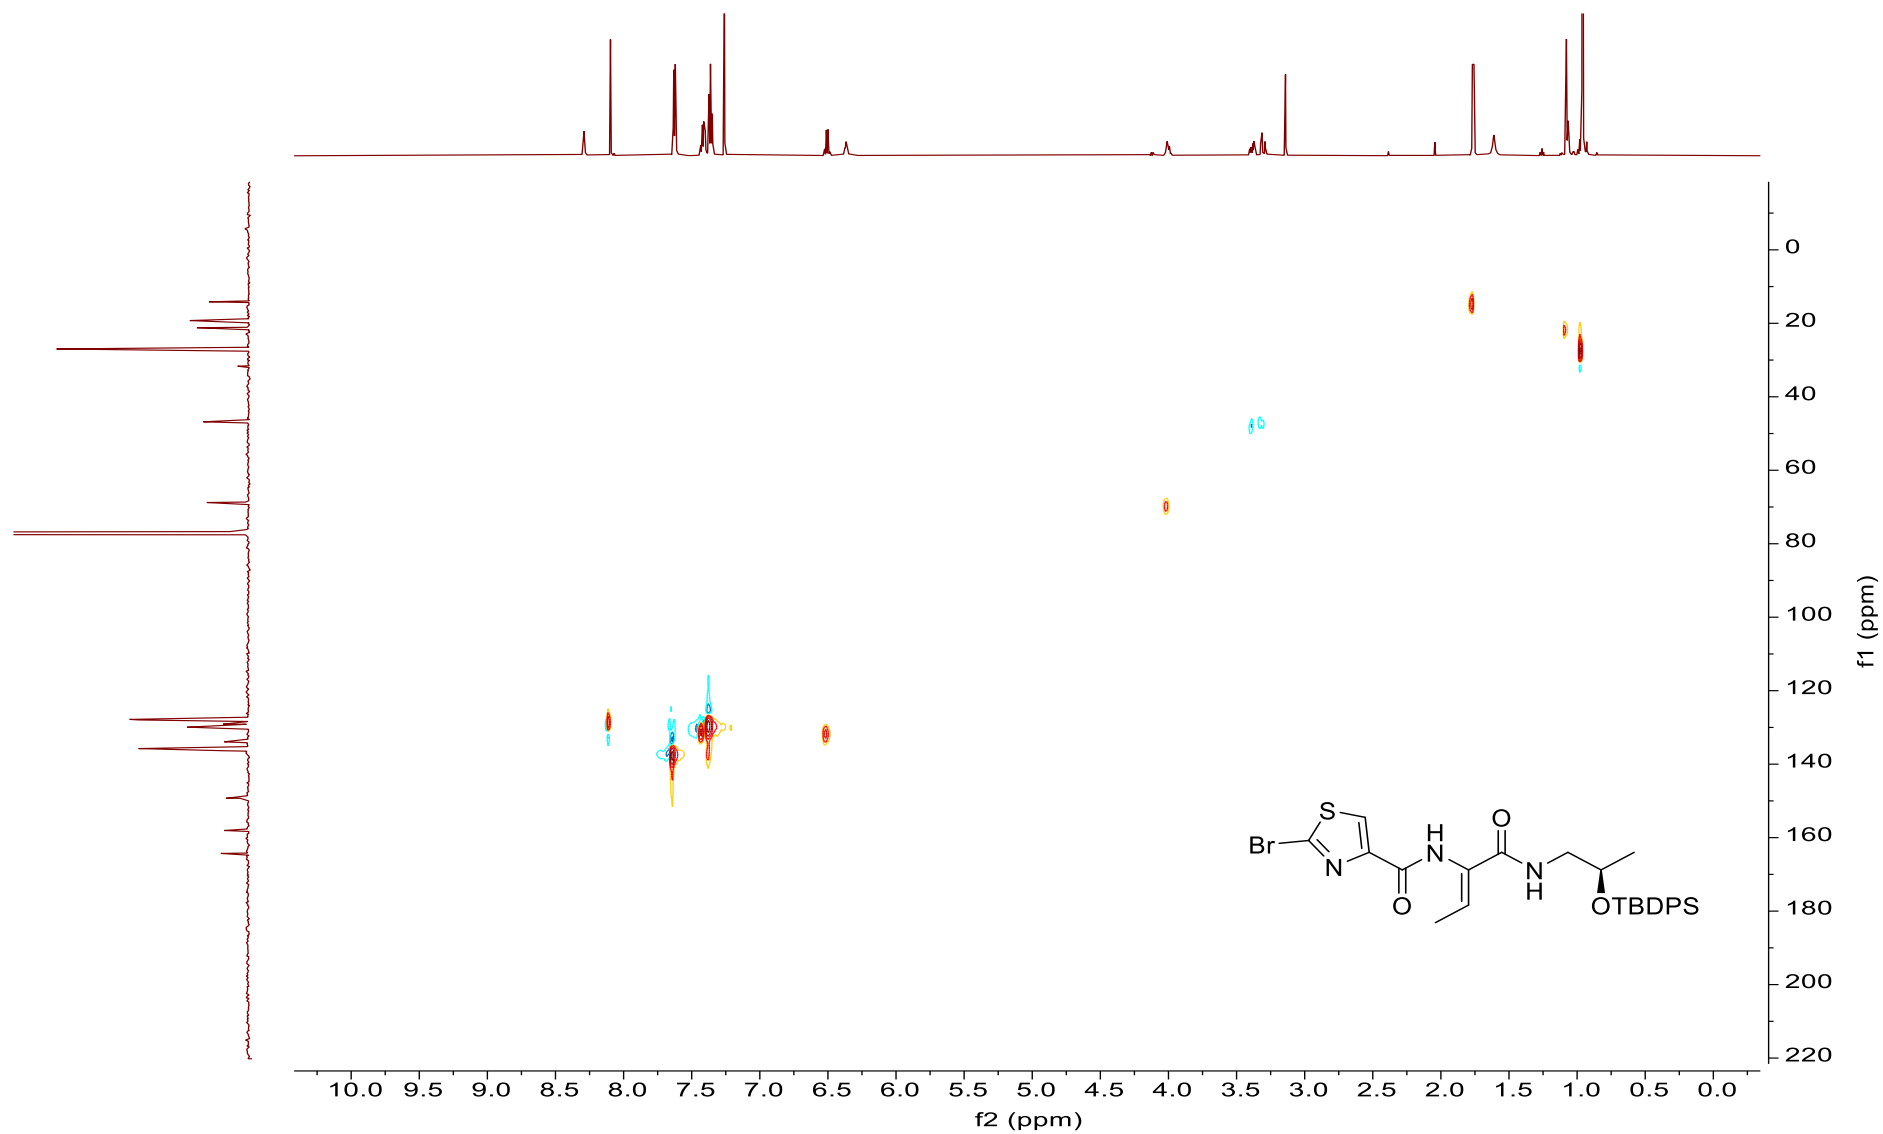

HSQC Spectrum of Compound 29 (600 MHz, CDCl<sub>3</sub>)



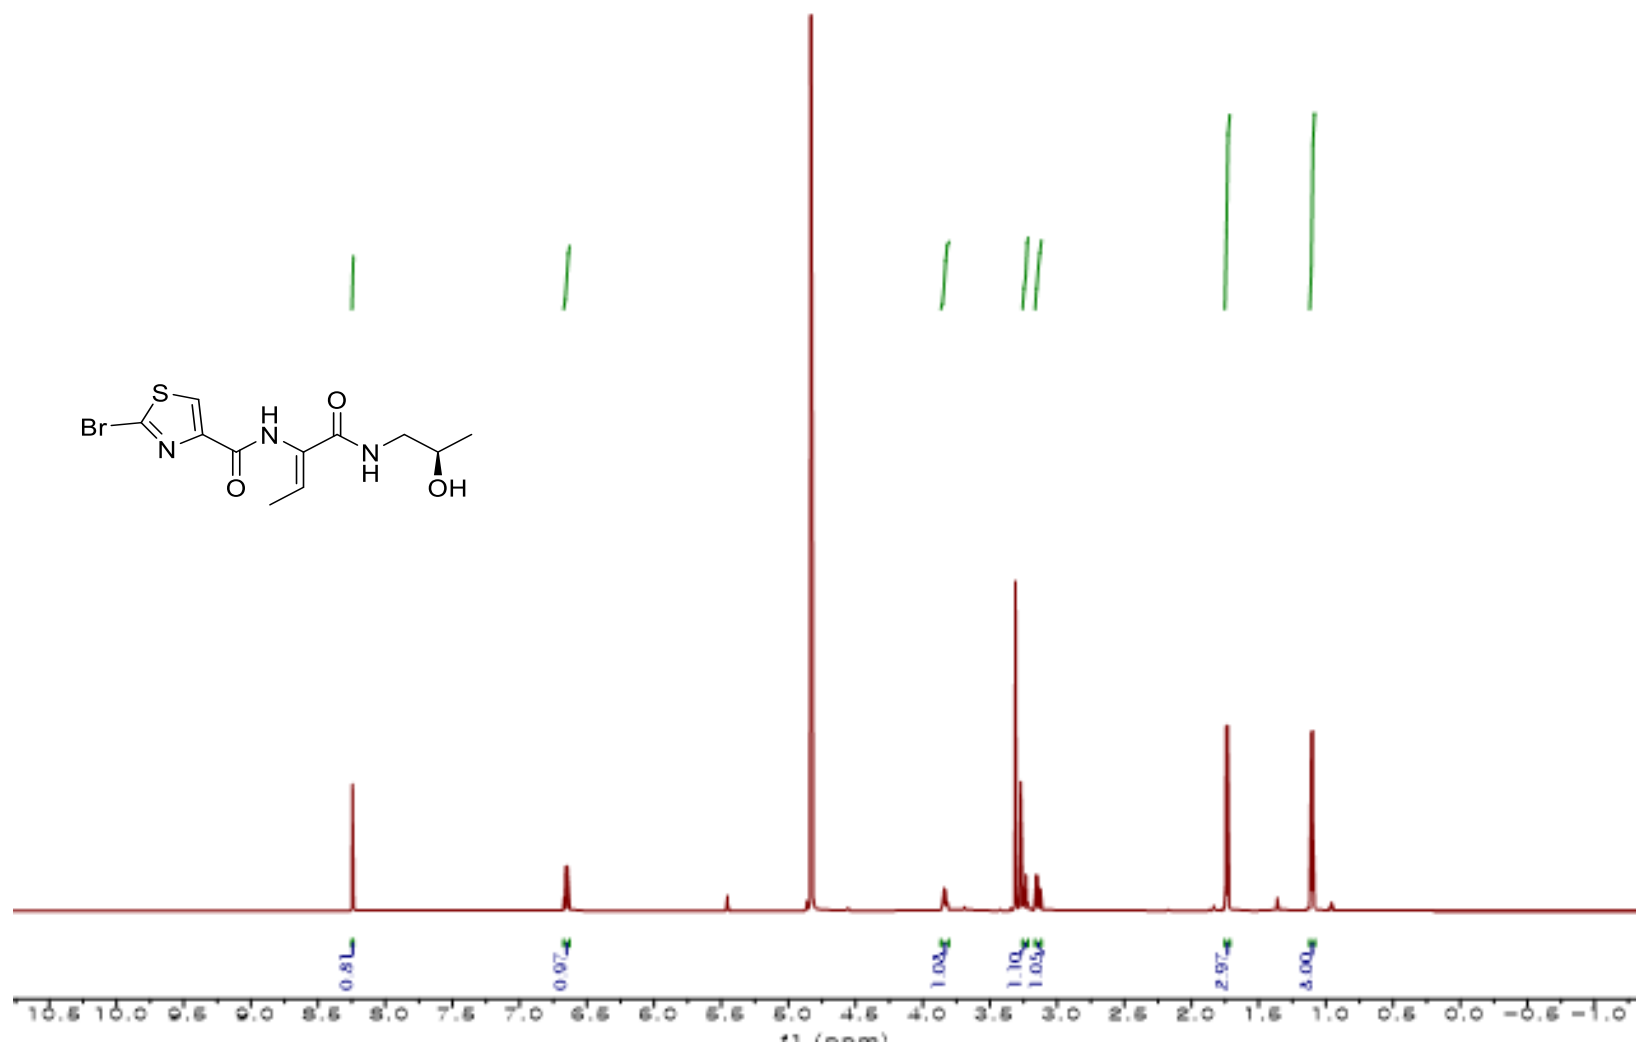

<sup>1</sup>H-NMR Spectrum of Compound 24 (600 MHz, CDCl<sub>3</sub>)

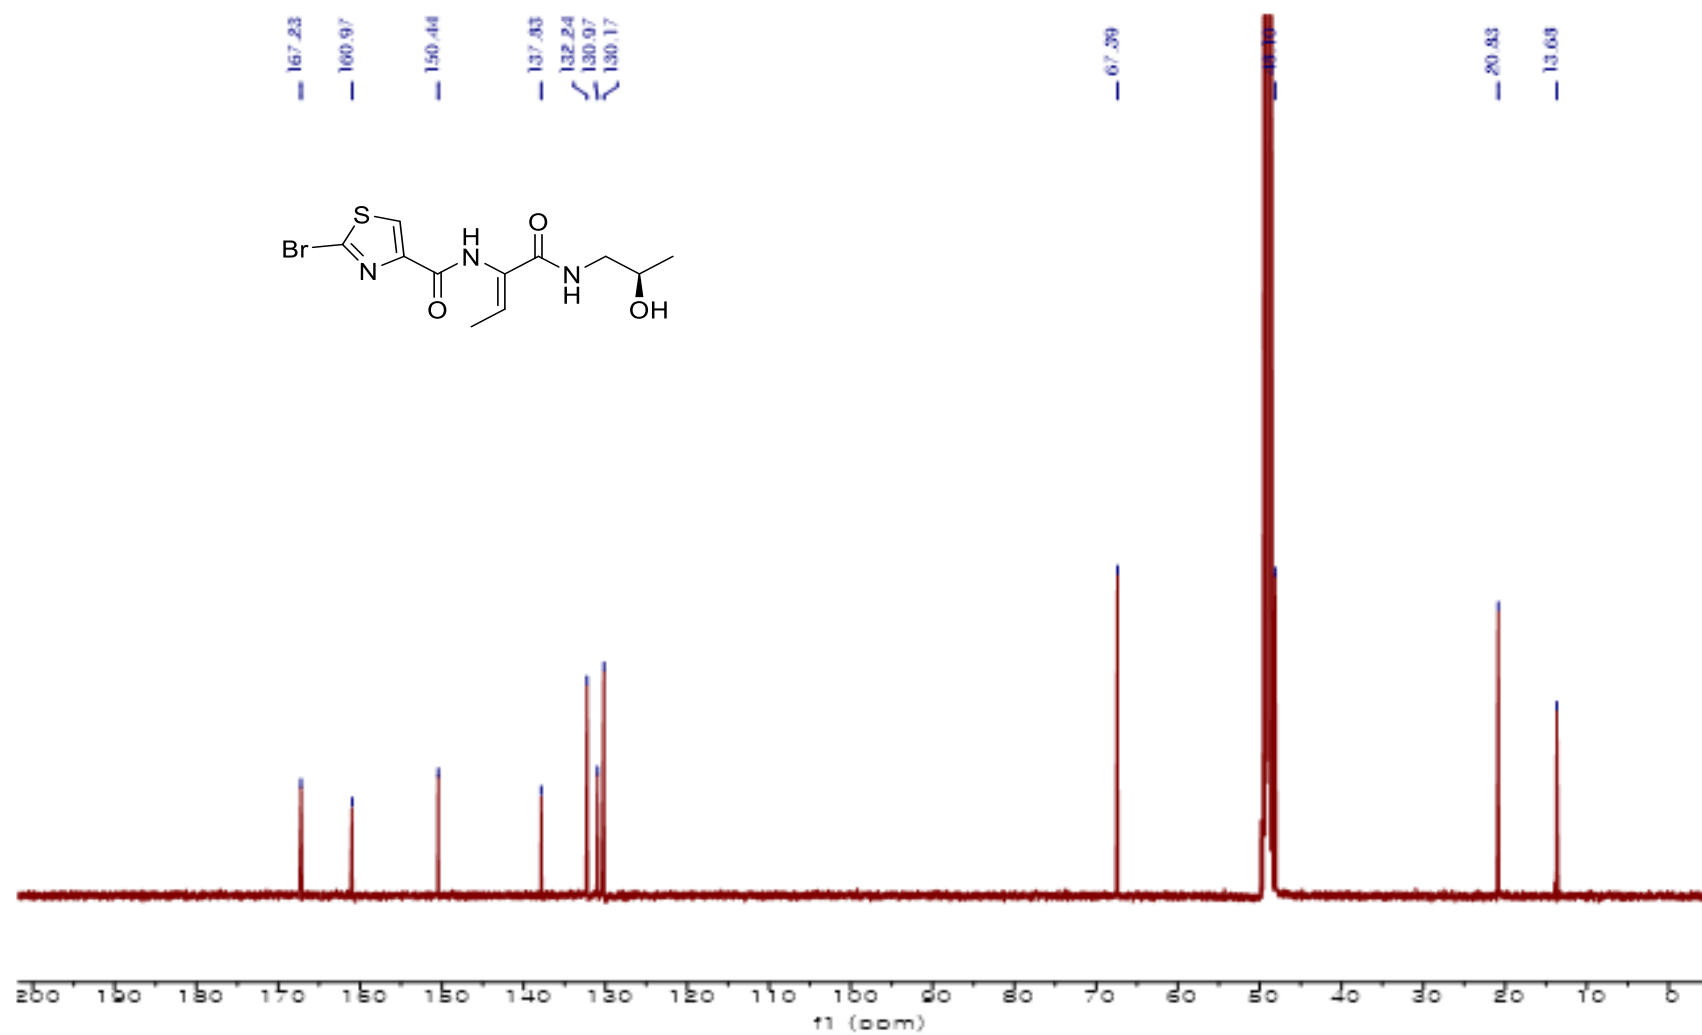

<sup>13</sup>C-NMR Spectrum of Compound 24 (151 MHz, CDCl<sub>3</sub>)

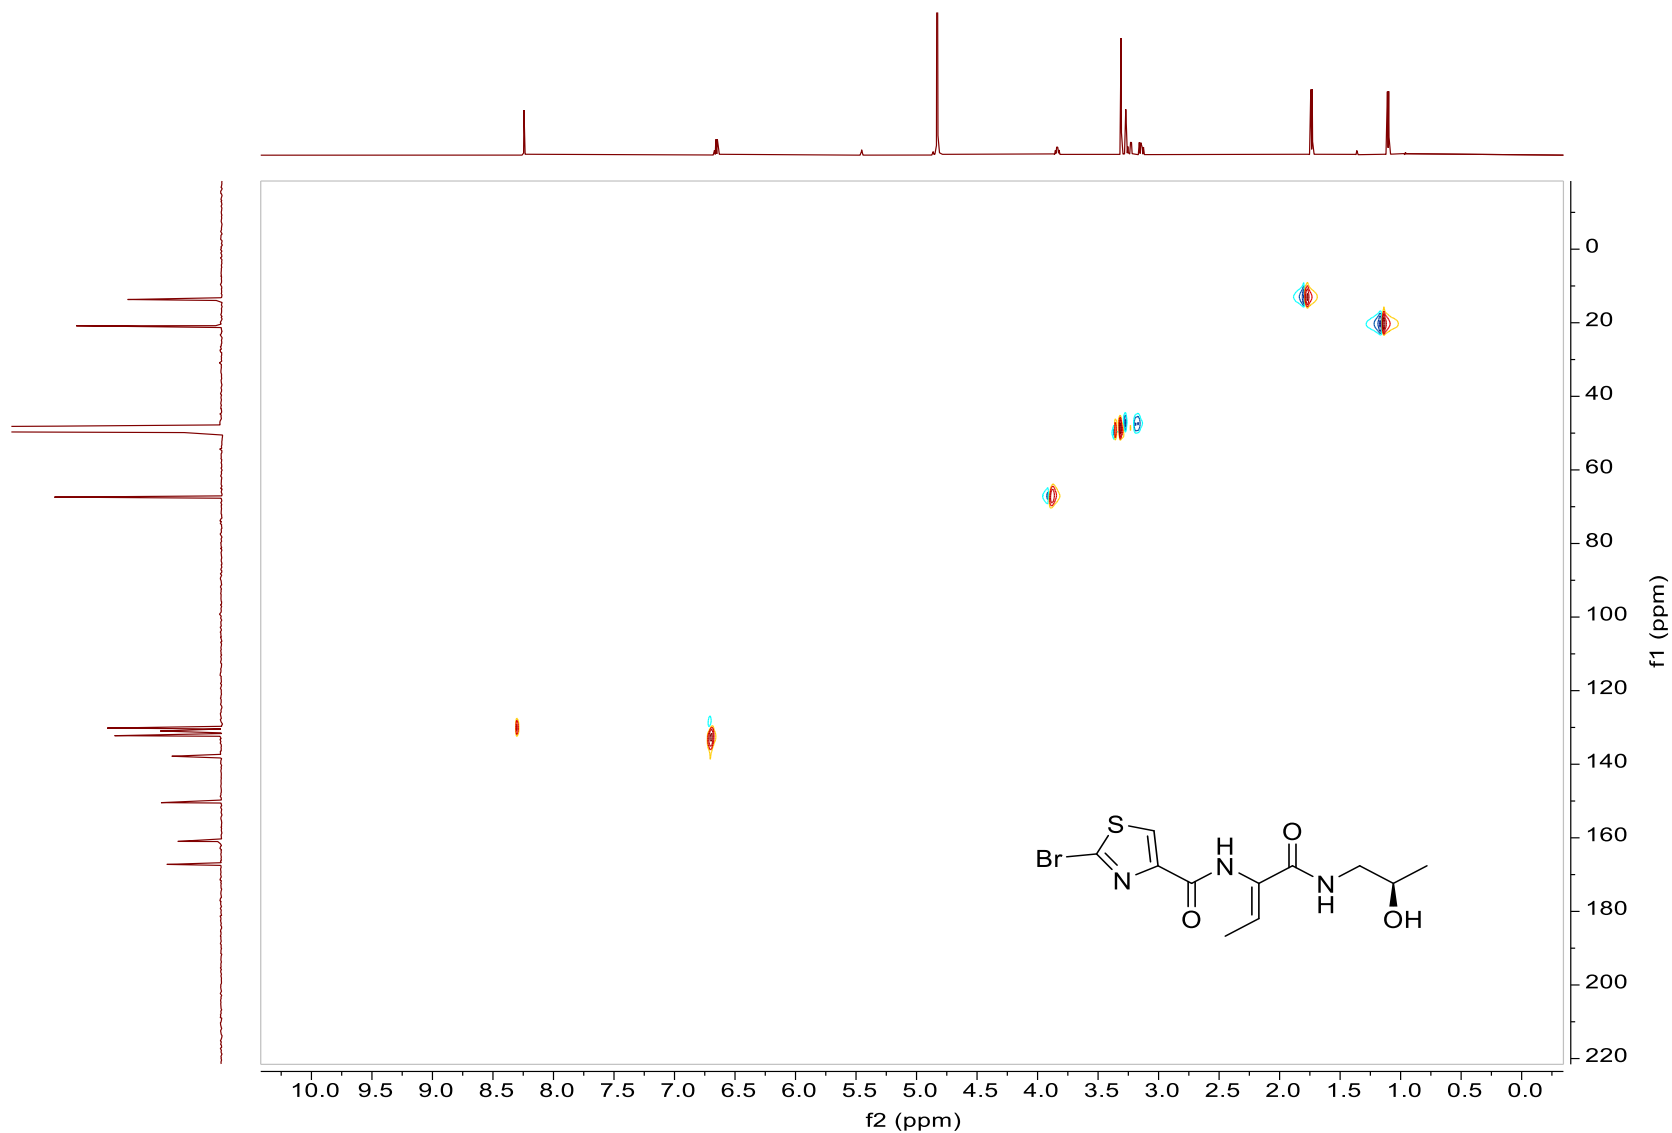

HSQC Spectrum of Compound 24 (600 MHz, CDCl<sub>3</sub>)

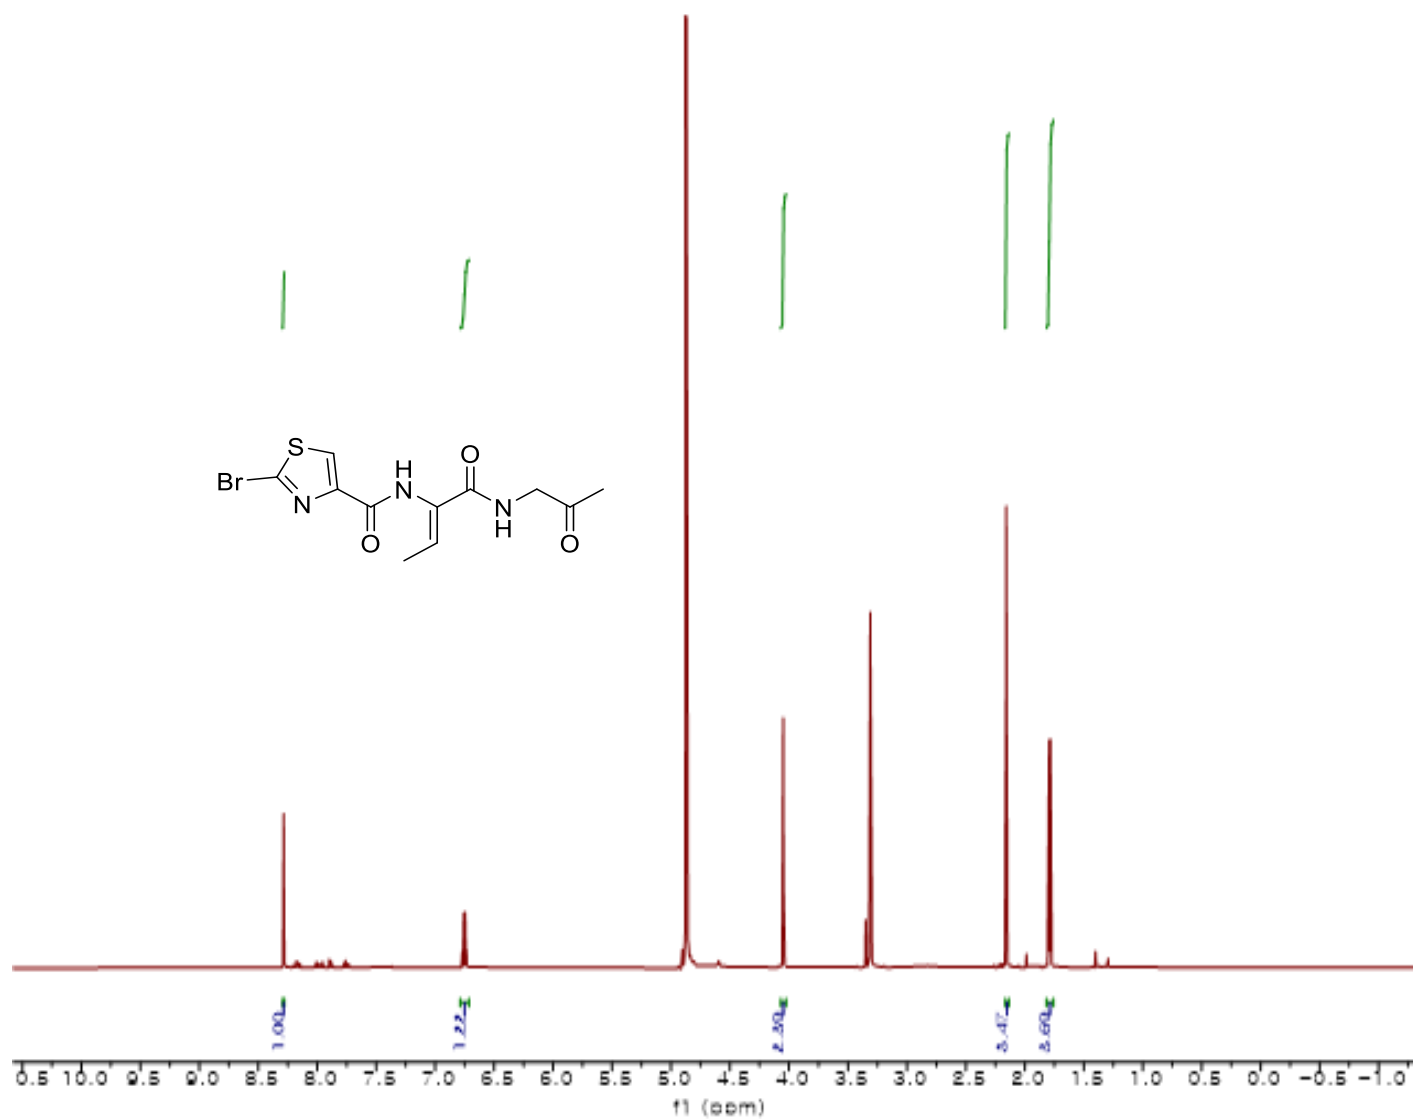

**<sup>1</sup>H-NMR Spectrum of Compound 25 (600 MHz, CDCl<sub>3</sub>)**

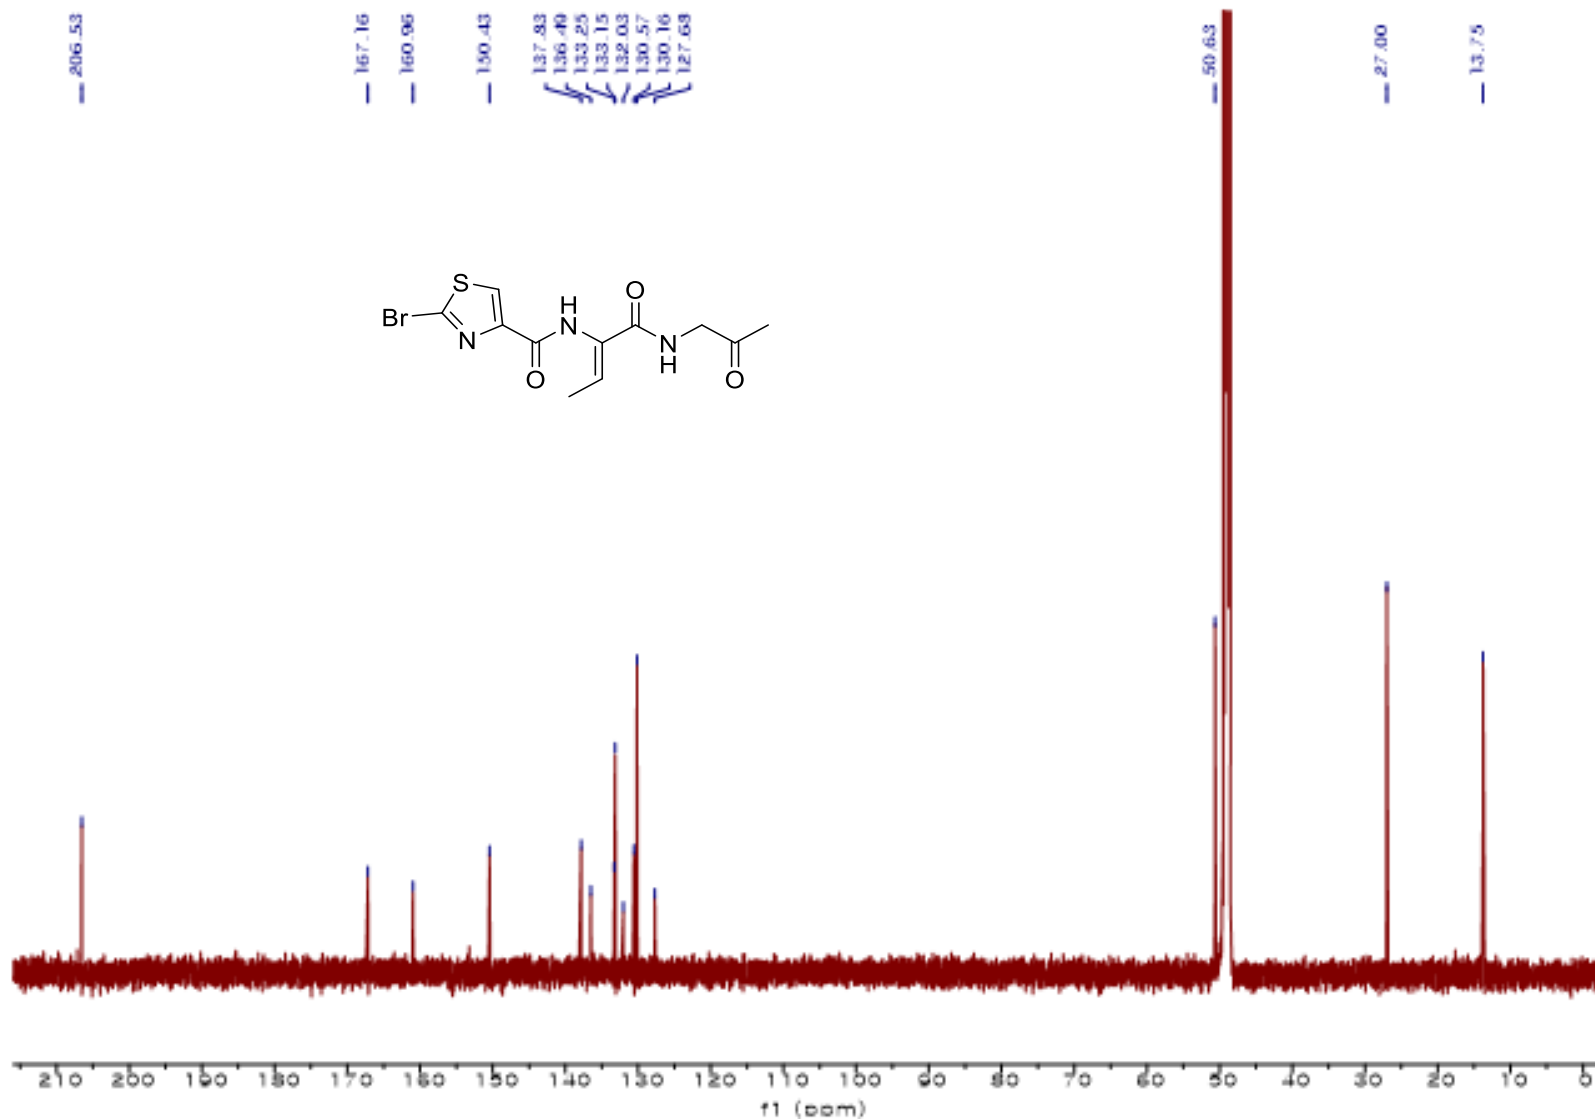

<sup>13</sup>C-NMR Spectrum of Compound 25 (151 MHz, CDCl<sub>3</sub>)

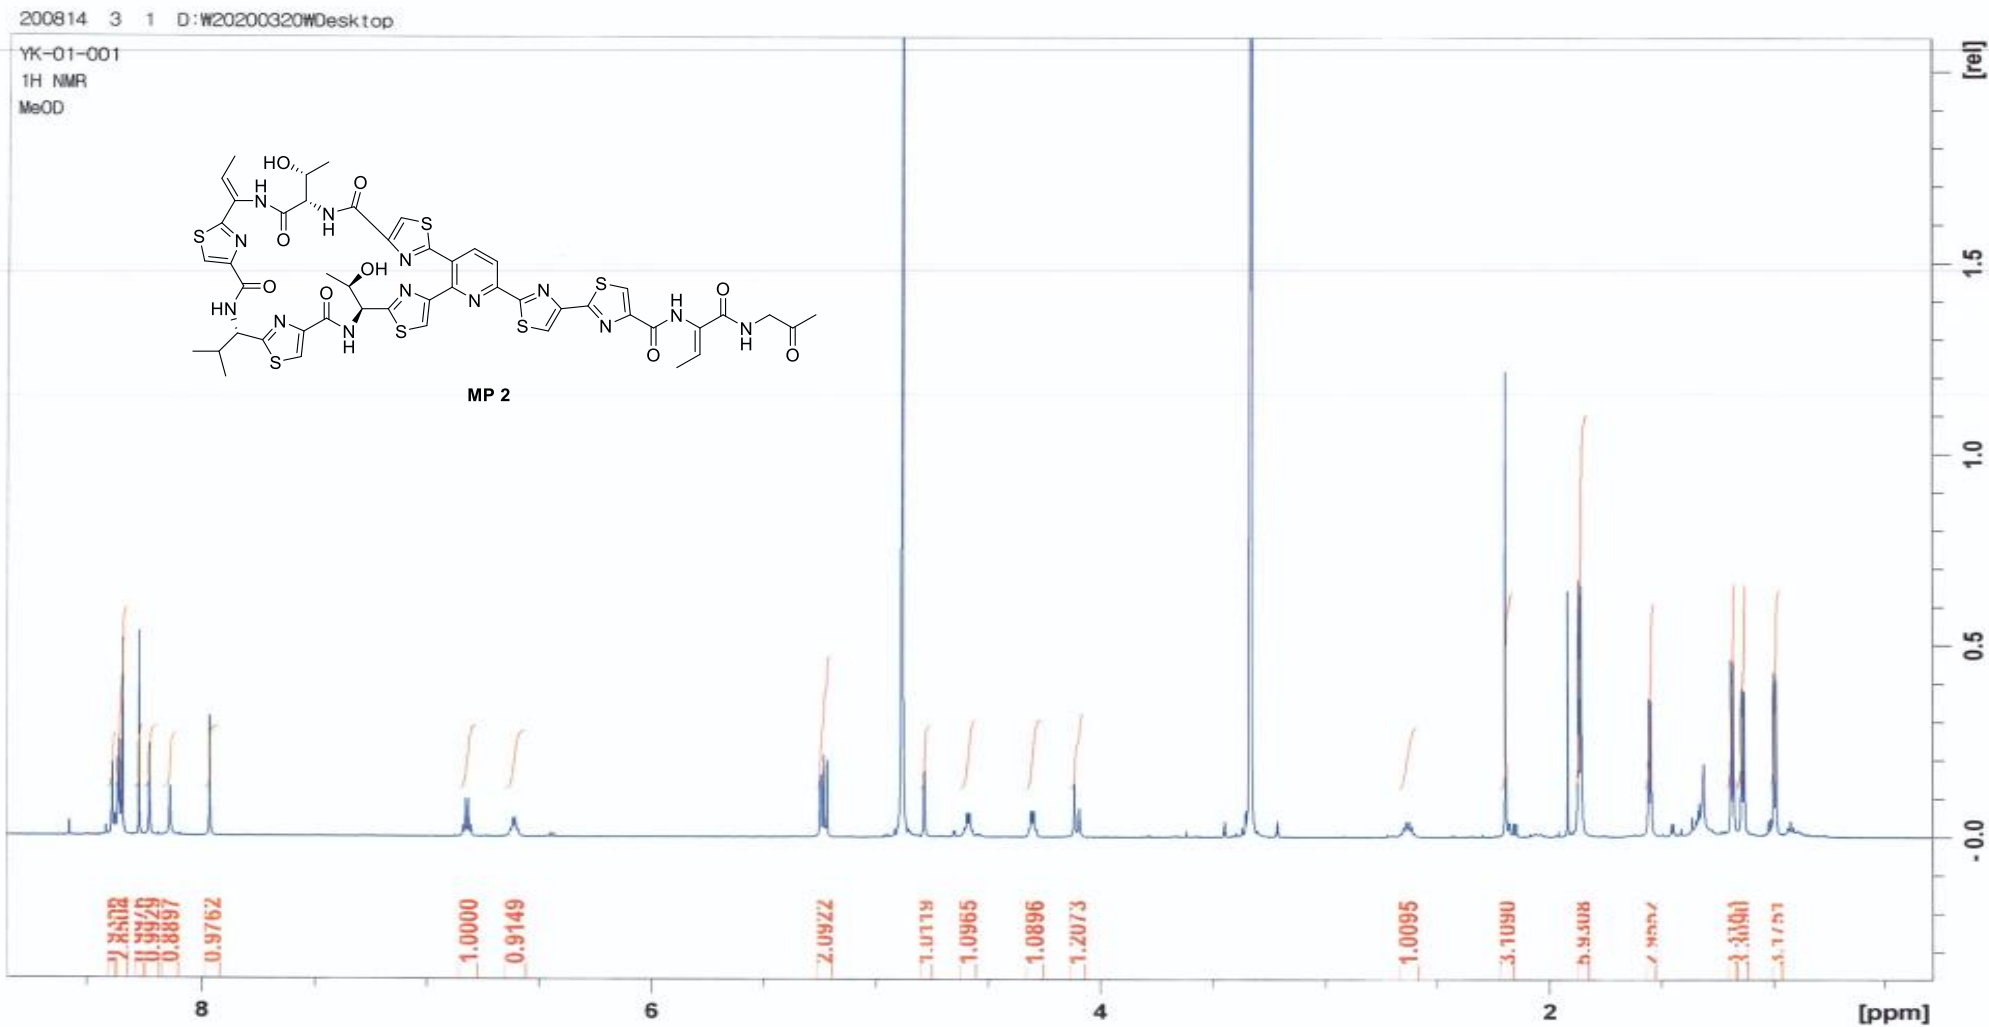

<sup>1</sup>H-NMR Spectrum of Synthetic Micrococcin P2, 1 (600 MHz, CD<sub>3</sub>OD)

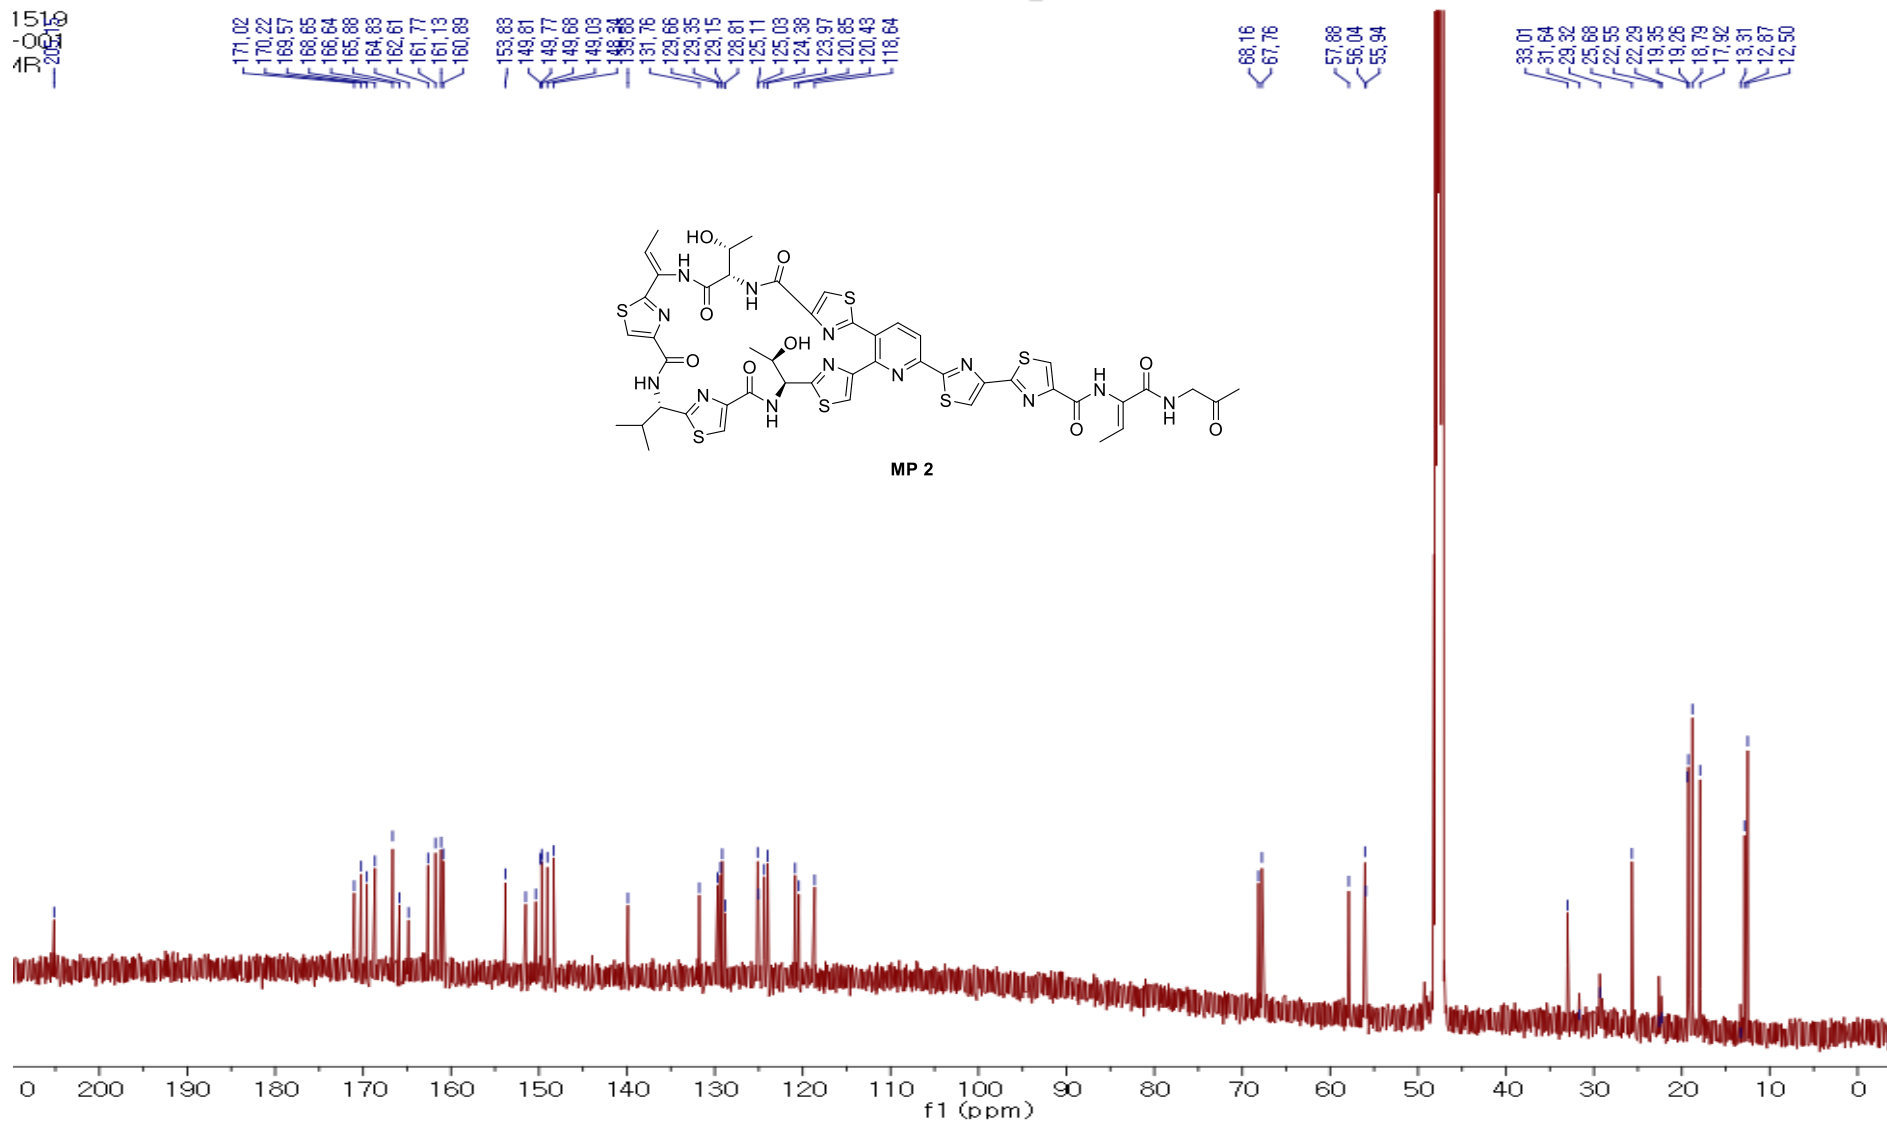

<sup>13</sup>C-NMR Spectrum of Synthetic Micrococcin P2, 1 (151 MHz, CD<sub>3</sub>OD)

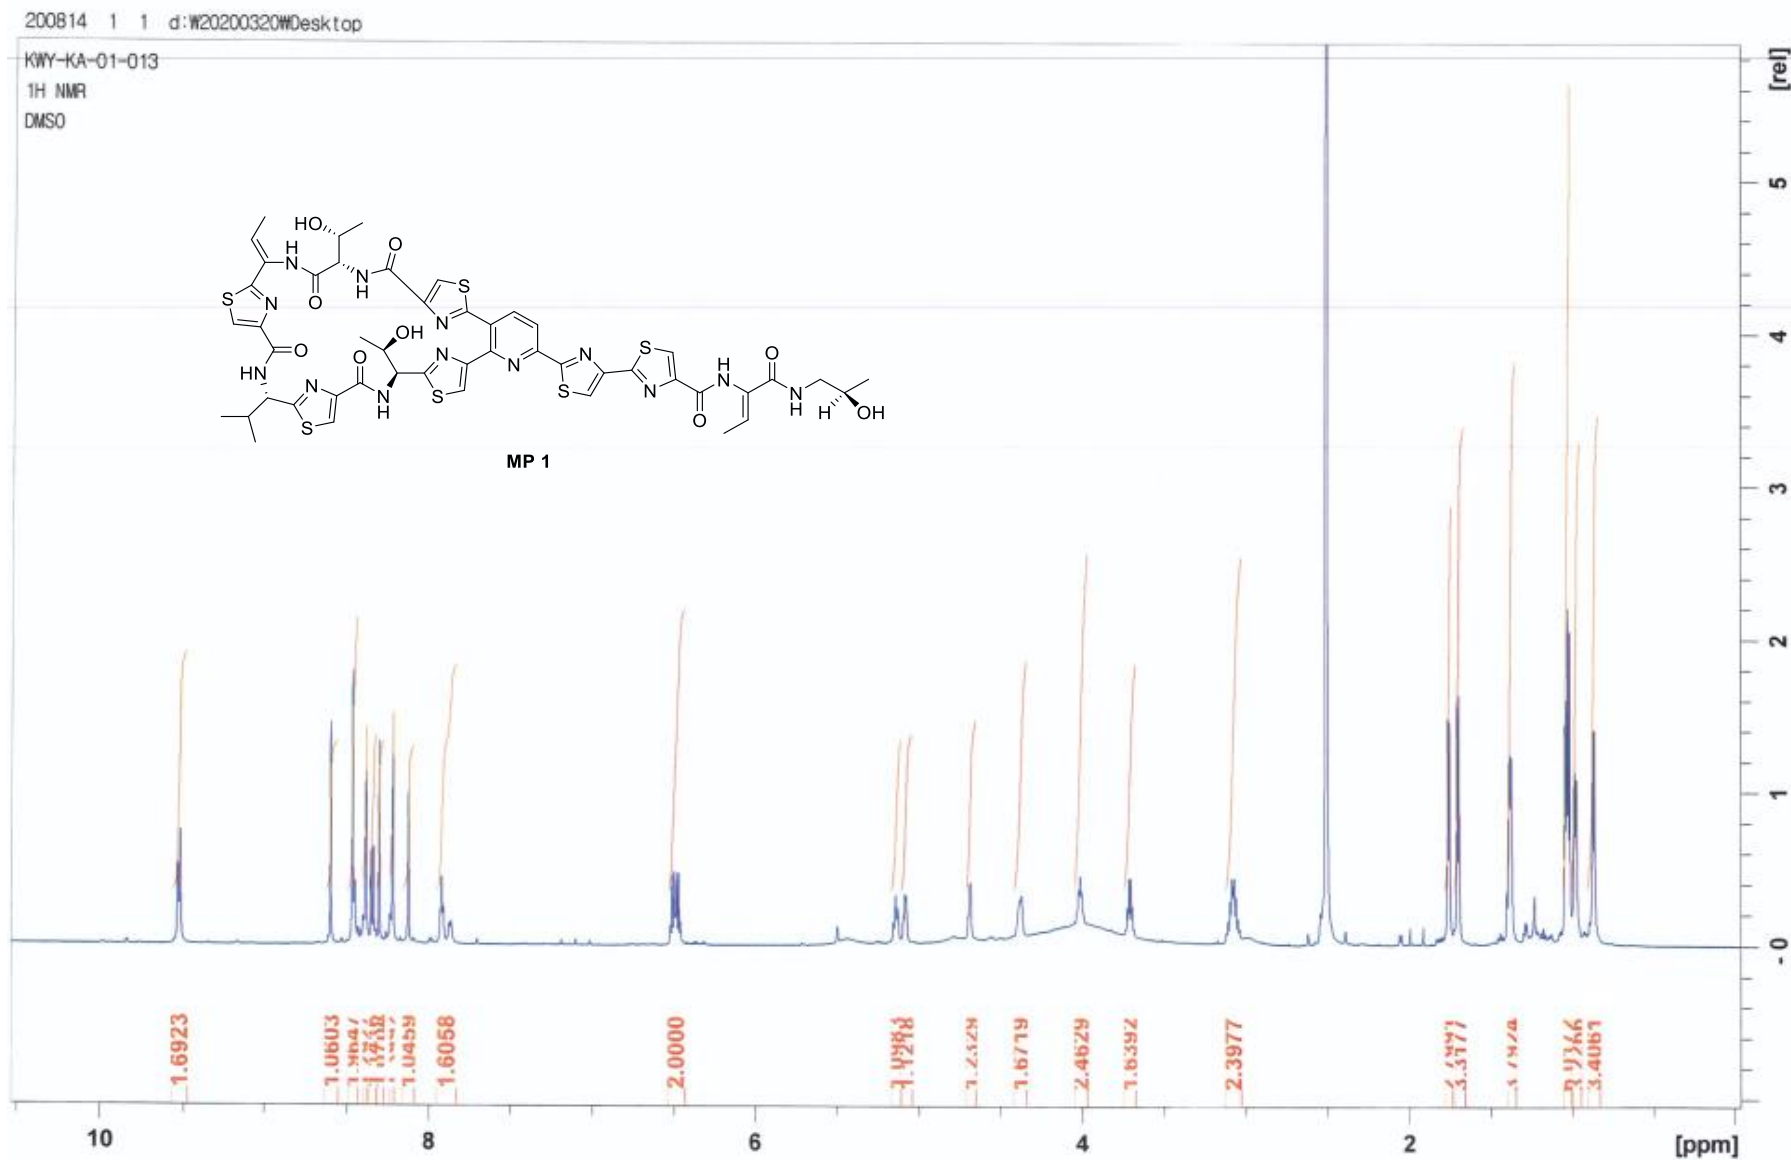

$^1\text{H}$  NMR spectrum of synthetic MP1 (600 MHz,  $\text{DMSO}-d_6$ )



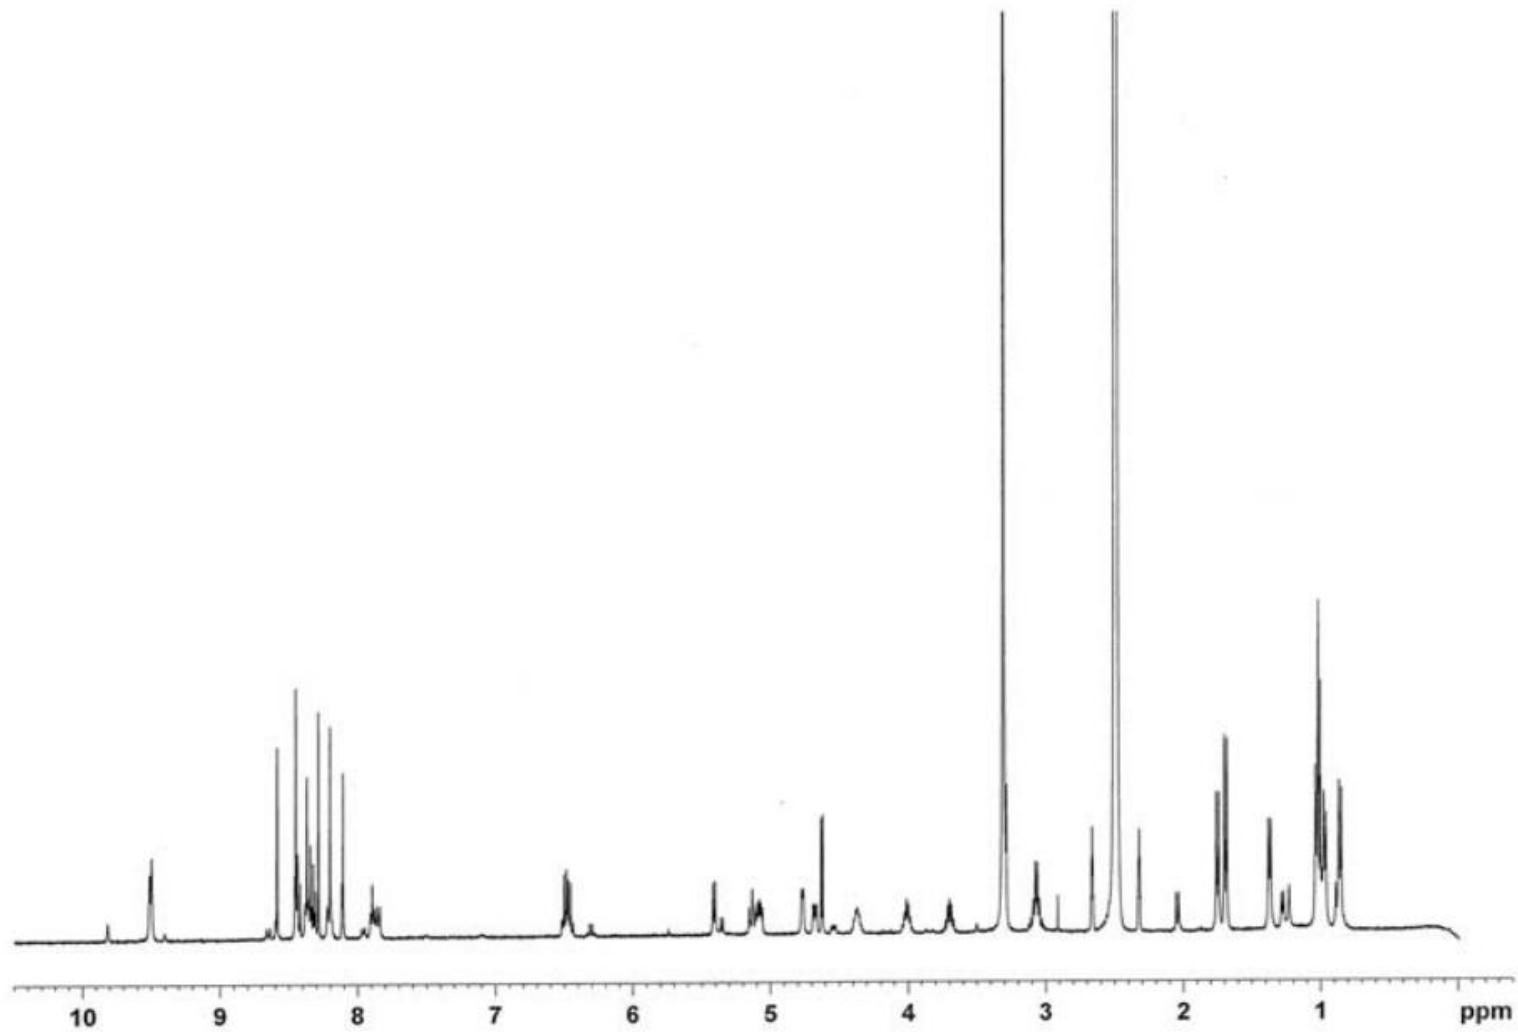

**<sup>1</sup>H NMR spectrum of authentic MP1 in DMSO-*d*<sub>6</sub><sup>1</sup> for comparison**

<sup>1</sup> This spectrum was reproduced from David Lefranc's dissertation (footnote 11).

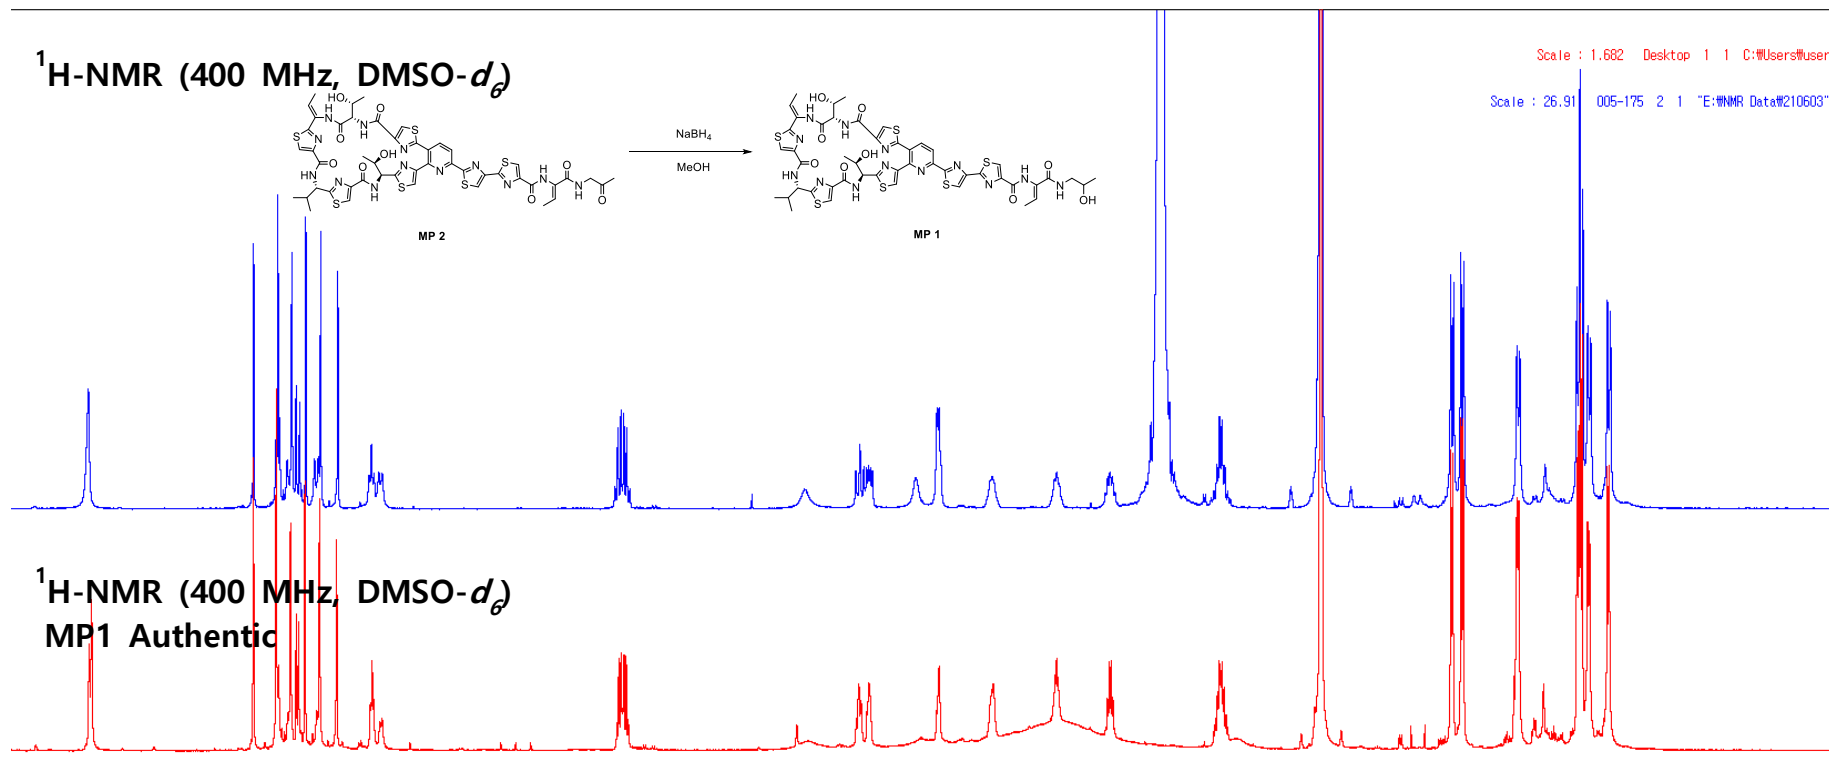

**$^1\text{H NMR}$  spectral comparison of reduced MP2 vs. MP1 ( $\text{DMSO-}d_6$ )**

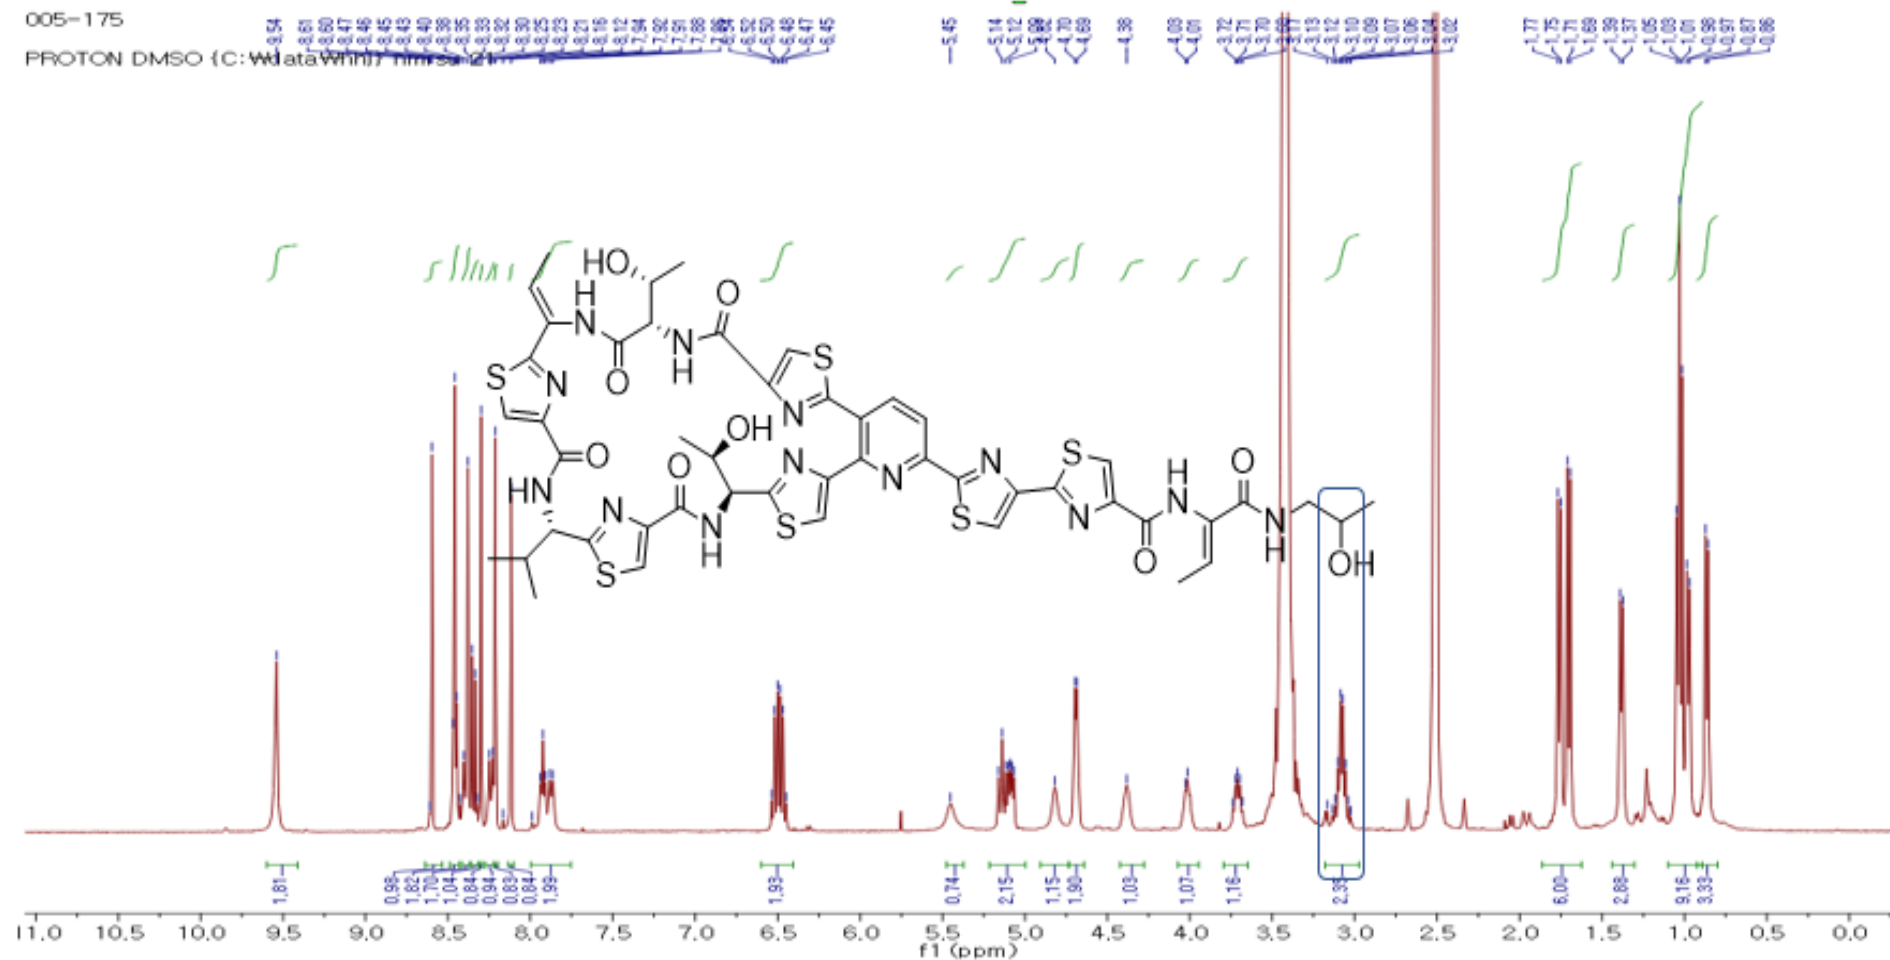

**$^1\text{H}$  NMR spectrum of reduced MP2 in  $\text{DMSO}-d_6$  (600 MHz): the epimers are not resolved**

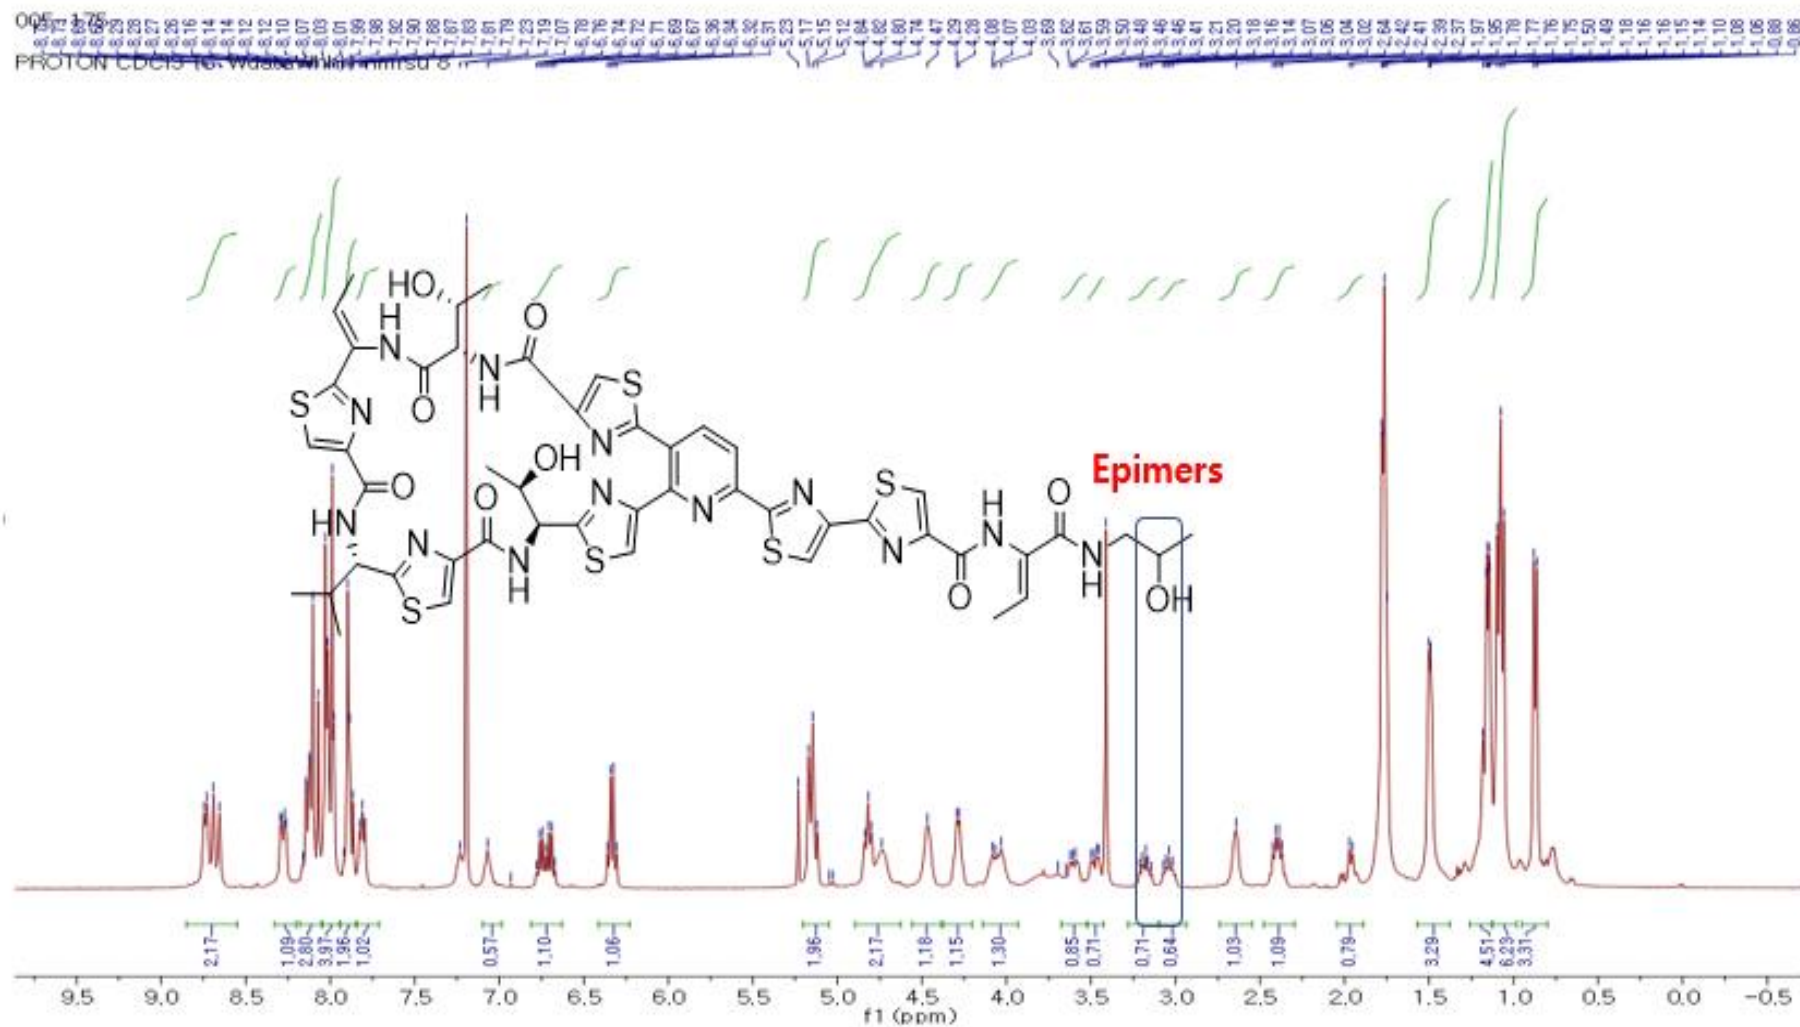

$^1\text{H}$  NMR spectrum of reduced MP2 in  $\text{CDCl}_3$  (600 MHz) clearly showing the presence of MP1 and *epi*-MP1

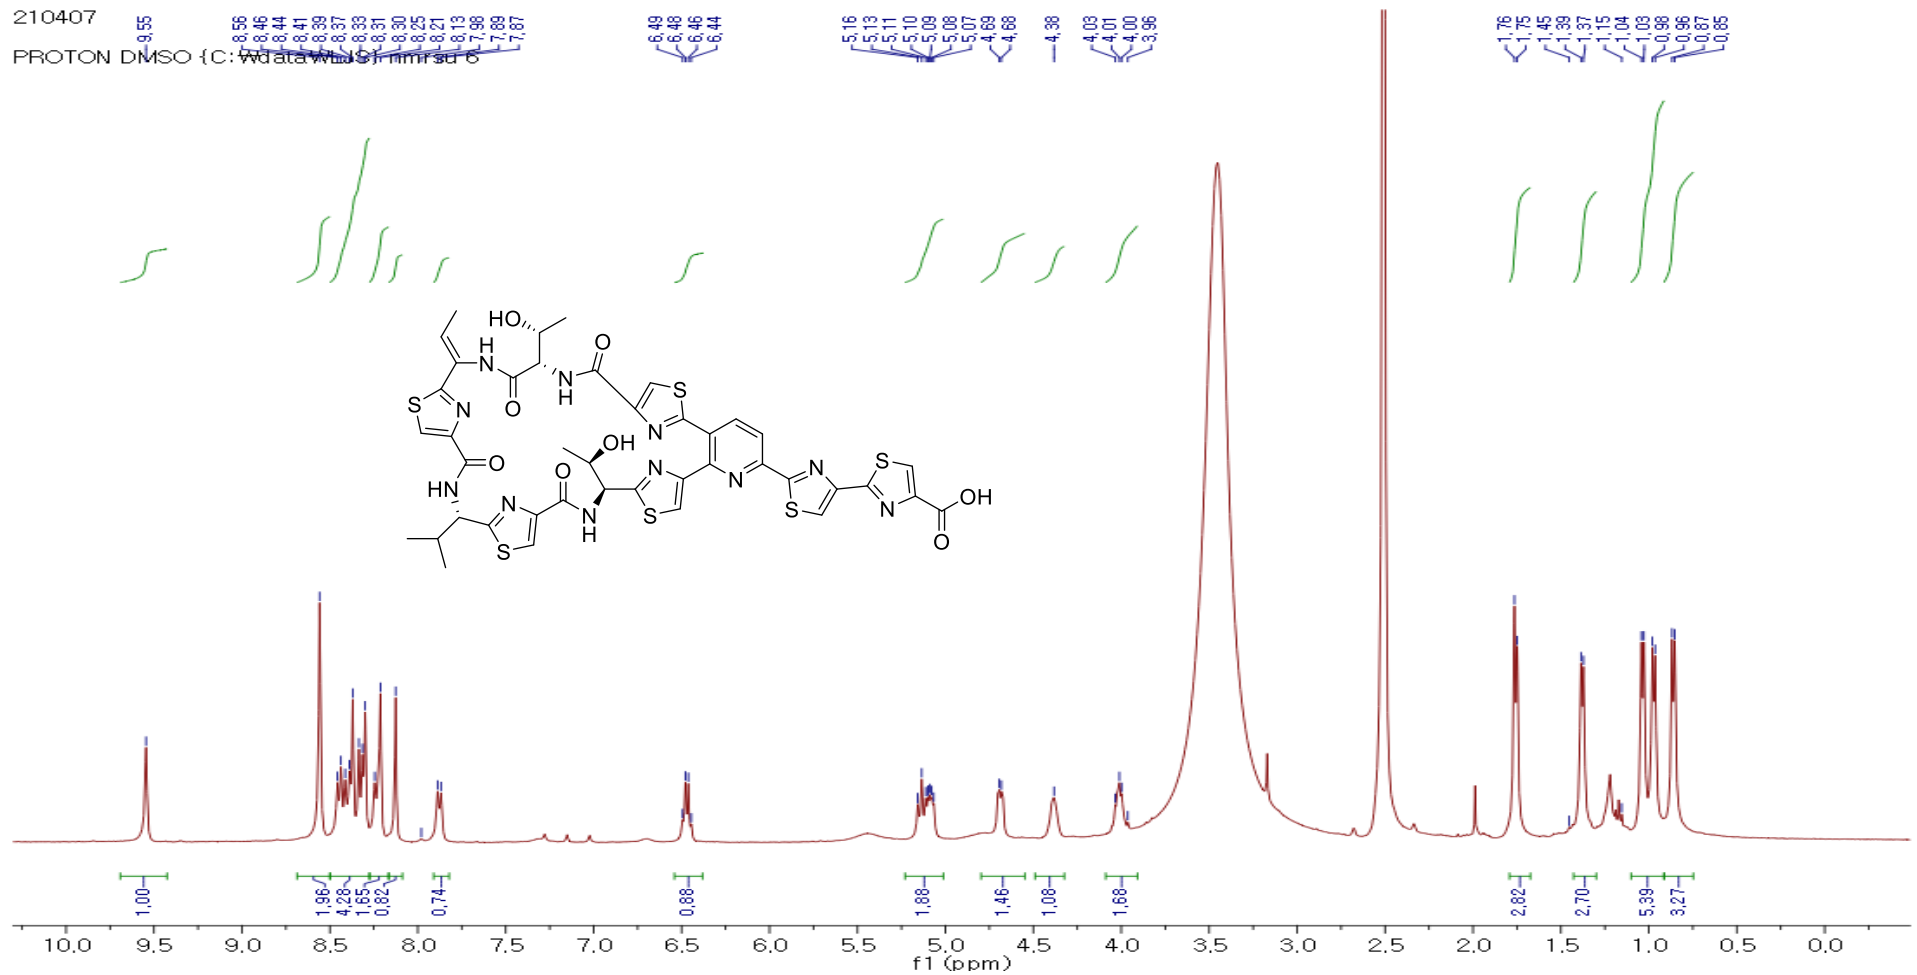

<sup>1</sup>H-NMR Spectrum of Compound 30 (400 MHz, DMSO-*d*<sub>6</sub>)

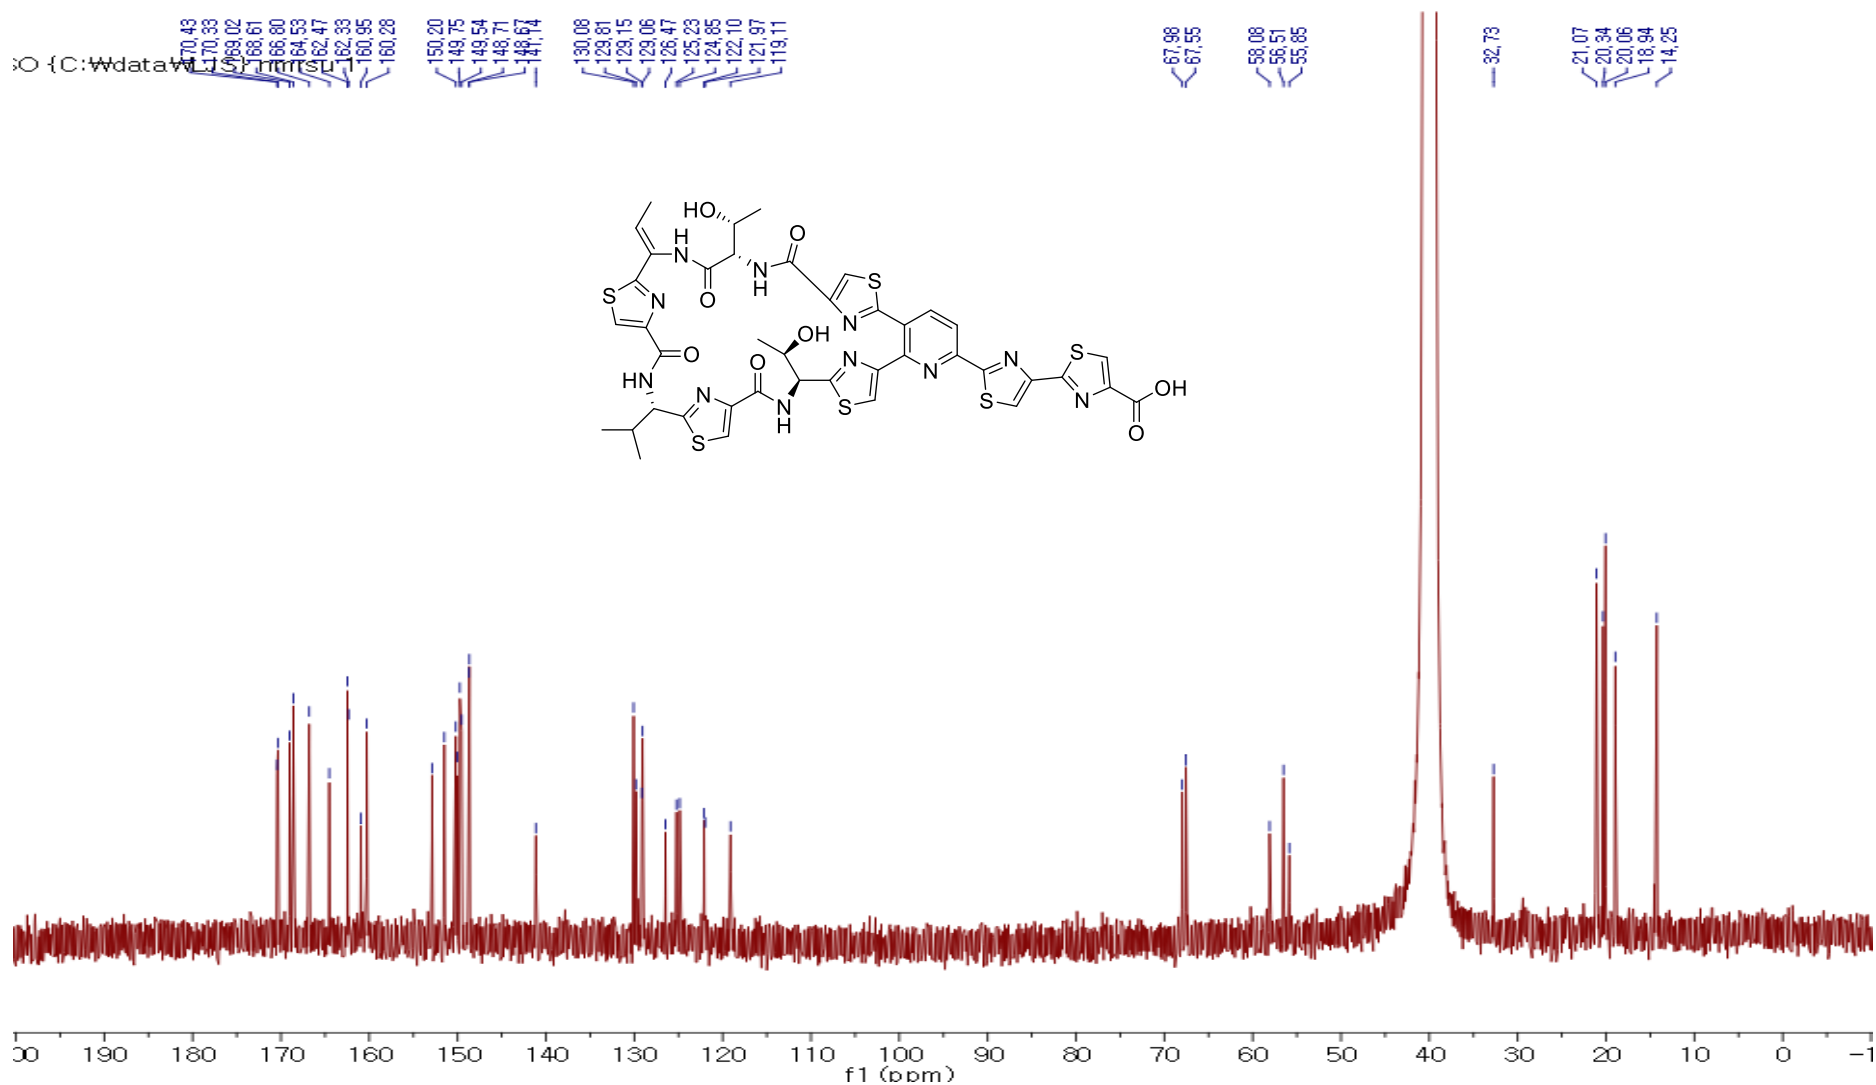

**<sup>13</sup>C-NMR Spectrum of Compound 30 (100 MHz, DMSO-*d*<sub>6</sub>)**

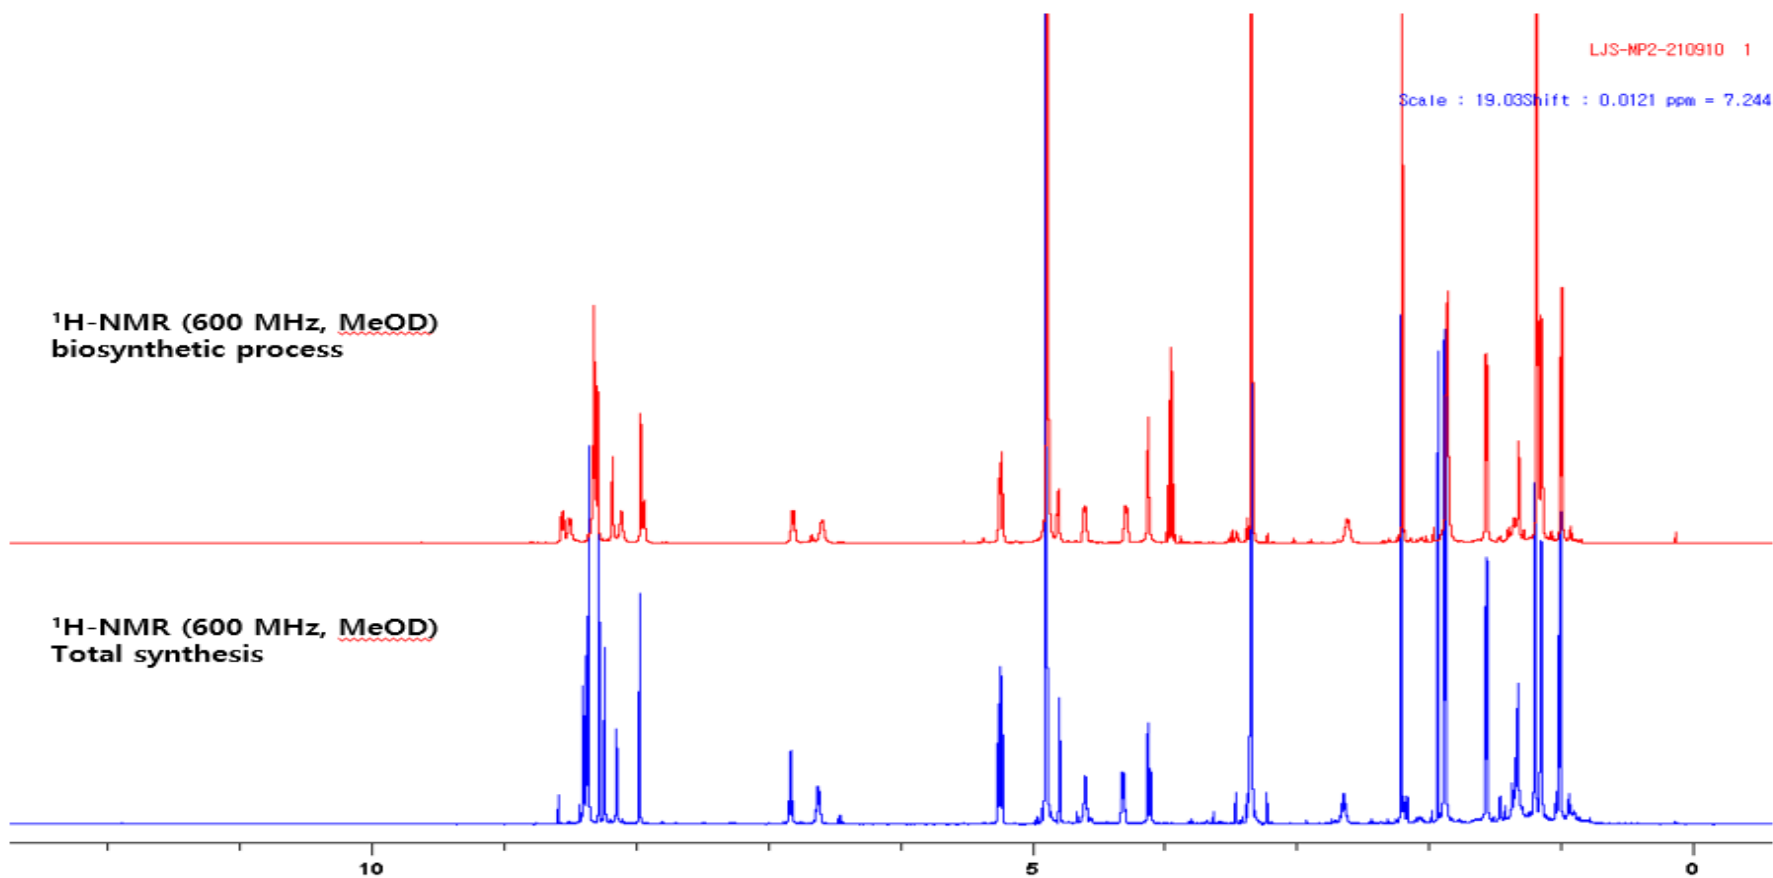

**<sup>1</sup>H-NMR Spectra of Fermented (top) vs. Synthetic MP2 (150 MHz, CD<sub>3</sub>OD)**

*small differences exist only at the level of exchangeable protons (OH and NH)*

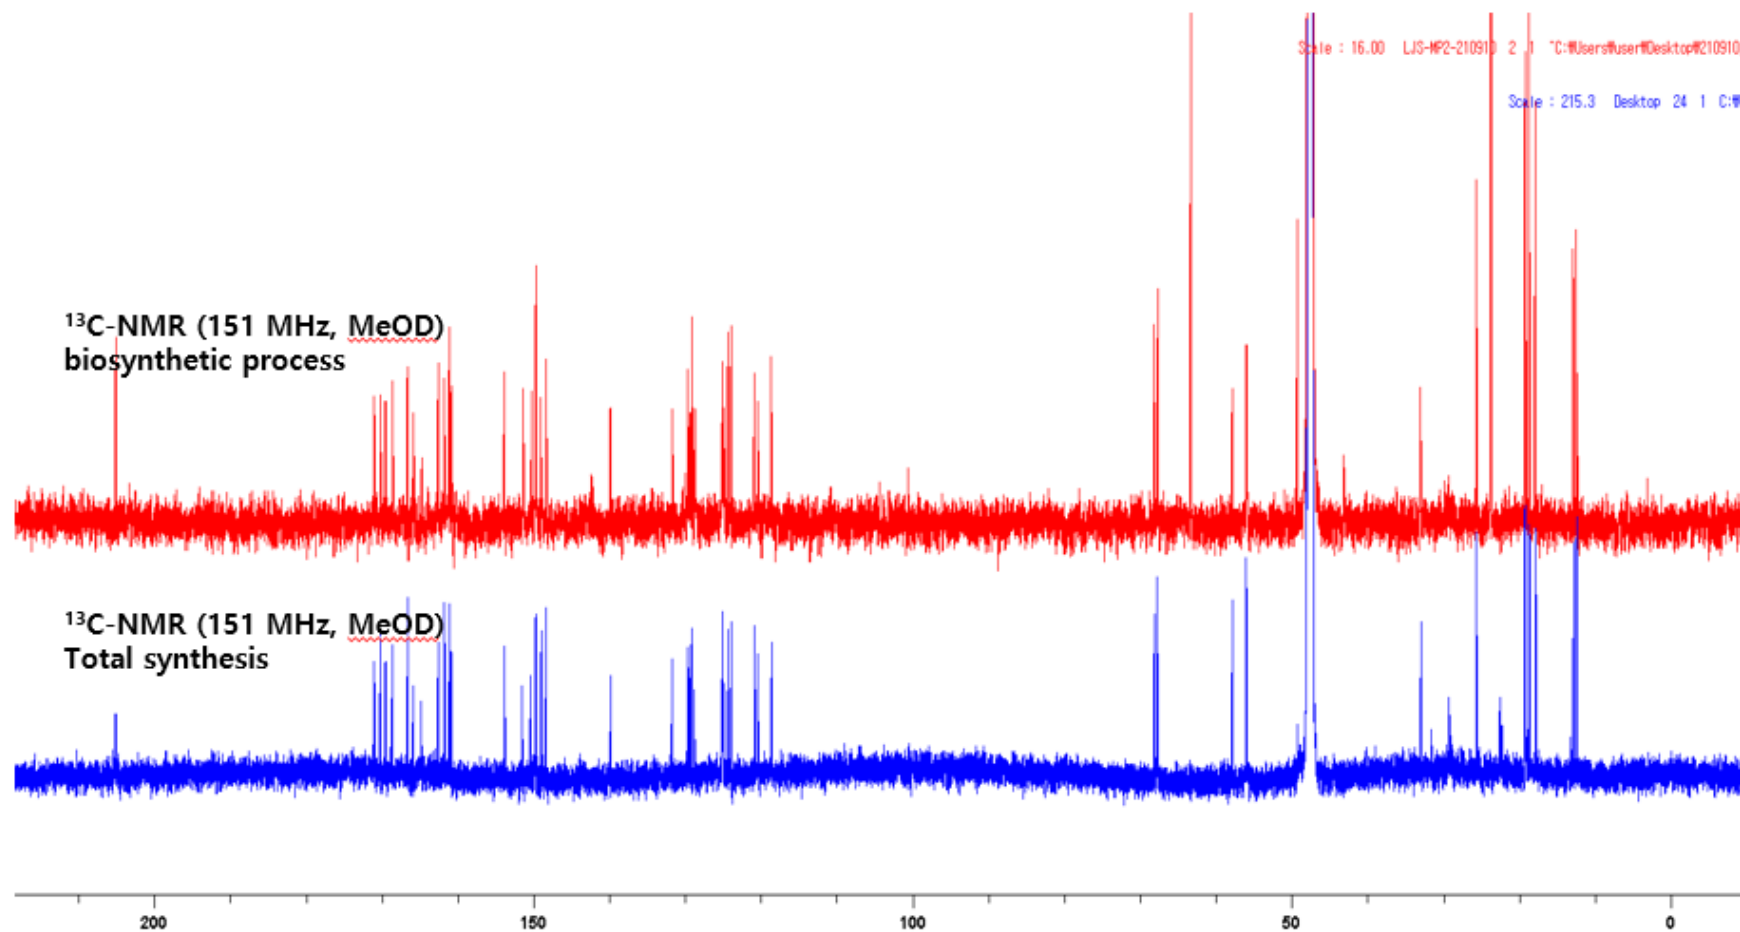

**$^{13}\text{C}$ -NMR Spectra of Fermented (top) vs. Synthetic MP2 (150 MHz,  $\text{CD}_3\text{OD}$ )**
